# Supplementary material for: A Systematic Review of Nutritional Lab Correlates with Chemotherapy Induced Peripheral Neuropathy
Source: MDPI journal article supplement (doi:10.3390/jcm11020355), 2022-01-12
Supplement: s1 [file s1]

**Title/ Topic:** Relationships Between Laboratory Measures of Nutrition and Chemotherapy-Induced Peripheral Neuropathy.

**Requesters/ Authors:** Cindy Toftthagen, Ph.D

The first round of searching was completed on June 04 or June 05, 2020. An updated search was run on December 08, 2021.

**Databases searched with number of original references and number of references after de-duplication.**

| Database                                                                     | Number of initial hits [06/04/2020] | Number after de-duplication [06/04/2020] | Number of hits [12/08/2021] | Number after de-duplication [12/08/2021] | Number after de-duplication with 06/04/2021 citation set [12/08/2021] |
|------------------------------------------------------------------------------|-------------------------------------|------------------------------------------|-----------------------------|------------------------------------------|-----------------------------------------------------------------------|
| 1. Ovid MEDLINE                                                              | 343                                 | 343                                      | 53                          | 53                                       | 38                                                                    |
| 2. Ovid EMBASE                                                               | 614                                 | 542                                      | 103                         | 91                                       | 79                                                                    |
| 3. Ovid Cochrane Central Register of Controlled Trials (CCRCT)               | 26                                  | 10                                       | 5                           | 2                                        | 2                                                                     |
| 4. Ovid Cochrane Database of Systematic Review (CDSR)                        | 0                                   | 0                                        | 1                           | 1                                        | 1                                                                     |
| 5. Scopus                                                                    | 270                                 | 236                                      | 33                          | 31                                       | 30                                                                    |
| 6. Web of Science - Science Citation Index Expanded (SCI-EXPANDED)           | 77                                  | 37                                       | 12                          | 4                                        | 3                                                                     |
| 7. Web of Science - Emerging Sources Citation Index (ESCI)                   | 4                                   | 4                                        | 1                           | 0                                        | 0                                                                     |
| 8. EBSCO - Cumulative Index to Nursing and Allied Health Literature (CINAHL) | 164                                 | 103                                      | 20                          | 14                                       | 14                                                                    |
| 9. Epistemonikos                                                             | 17                                  | 16                                       | 24                          | 21                                       | 4                                                                     |
| Grey Literature                                                              | 13                                  | 10                                       | 10                          | 9                                        | 9                                                                     |
| 10. ClinicalTrials.gov                                                       | - 10                                | - 0                                      | - 6                         | - 6                                      | - 6                                                                   |
| 11. medRxiv                                                                  | - 0                                 | - 0                                      | - 2                         | - 2                                      | - 2                                                                   |

|                   |             |             |            |            |            |
|-------------------|-------------|-------------|------------|------------|------------|
| 12. NICE Evidence | - 3         | - 0         | - 1        | - 0        | - 0        |
| 13. OpenGrey      | - 0         | - 0         | - 0        | - 0        | - 0        |
| 14. PROSPERO      | - 0         | - 0         | - 1        | - 1        | - 1        |
| <b>Total</b>      | <b>1528</b> | <b>1301</b> | <b>262</b> | <b>226</b> | <b>180</b> |

*Complete search strategy for each database and grey literature resources for the appendix.*

**1. Ovid MEDLINE(R)** 1946 to Present and Epub Ahead of Print, In-Process & Other Non-Indexed Citations and Ovid MEDLINE(R) Daily – searched June 4, 2020.

*Update: Ovid MEDLINE(R) 1946 to Present and Epub Ahead of Print, In-Process & Other Non-Indexed Citations and Ovid MEDLINE(R) Daily – date range searched: January 01, 2020 – current (searched on December 08, 2021).*

1. exp Peripheral Nervous System Diseases/ci [Chemically Induced]
2. exp Neuralgia/ci
3. 1 or 2
4. Peripheral Nervous System Diseases/
5. ((peripheral adj2 (nerve\* or nervous) adj2 (disease\* or disorder\*)) or "peripheral neuropath\*").ti,ab,oa,kw.
6. (PNS adj2 (disease\* or disorder\*)).ti,ab,oa,kw.
7. 4 or 5 or 6
8. exp Antineoplastic Agents/ or Antineoplastic Combined Chemotherapy Protocols/ or Chemotherapy, Adjuvant/ or (antineoplastic or chemotherap\* or chemo-therap\* or ((anticancer\* or anti-cancer\* or anticarcino\* or anti-carcino\* or antitumor or anti-tumor or antitumour\* or anti-tumour\* or carcinostatic) adj2 (therap\* or agent or agents or treatment\* or management\*)) or carcinochemo\* or "tumor inhibitor" or "tumour inhibitor").ti,ab,oa,kw.
9. ("paclitaxel" or "abi 007" or "abi007" or "abraxane" or "albumin bound paclitaxel" or "anzatax" or "apealea" or "asotax" or "biotax" or "bms 181339" or "bms181339" or "bmy 45622" or "bmy45622" or "bristaxol" or "britaxol" or "coroxane" or "dts 301" or "dts301" or "endotag-1" or "formoxol" or "genexol" or "genexol pm" or "hunxol" or "ifaxol" or "infinnium" or "intaxel" or "mbt 0206" or "mbt0206" or "medixel" or "mitotax" or "nab paclitaxel" or "nanoparticle albumin bound paclitaxel" or "nsc 125973" or "nsc 673089" or "nsc125973" or "nsc673089" or "oas pac 100" or "oaspac100" or "oncogel" or "onxol" or "pacitaxel" or "paclitaxel nab" or "pacxel" or "padexol" or "parexel" or "paxceed" or "paxene" or "paxus" or "praxel" or "taxocris" or "taxol" or "taycovit" or "yewtaxan").ti,ab,sh.
10. ("docetaxel" or "daxotel" or "dexotel" or "docefrez" or "docetaxel accord" or "lit 976" or "lit976" or "n debenzoyl n tert butoxycarbonyl 10 deacetylaxol" or "n tert butoxycarbonyl 10 deacetyl n

debenzoyltaxol" or "nsc 628503" or "nsc628503" or "oncodocel" or "rp 56976" or "rp56976" or "taxespira" or "taxoter" or "taxotere" or "texot").ti,ab,sh.

11. ("oxaliplatin" or "axiplatin" or "crisapla" or "croloxat" or "dacotin" or "dacplat" or "ebeoxal" or "elatofen" or "eloxatin" or "eloxatine" or "elplat" or "geneplatin" or "heloxatin" or "lipoxal" or "mbp 426" or "mbp426" or "medoxa" or "oplat" or "oxalatoplatinum" or "oxalatplatin" or "oxali" or "oxalip" or "oxaliplan" or "oxaliplatina" or "oxaliprol" or "oxaliquid" or "oxalisan" or "oxalisin" or "oxalizer" or "oxaltic" or "oxaltina" or "oxaplamyl" or "oxaviatin" or "platox" or "plaxitin" or "rectoxal" or "riboxatin" or "rp 54780" or "rp54780" or "sinoxal" or "sr 96669" or "sr96669" or "transplastin" or "velminox" or "xaliplat" or "xoplan").ti,ab,sh.

12. ("cisplatin" or "abiaplatin" or "biocisplatinum" or "biocysplatinum" or "blastolem" or "briplatin" or "cddp ti" or "cis ddp" or "cis diamine dichloroplatinum" or "cis diaminechloroplatinum" or "cis diaminedichloroplatinum" or "cis diammine dichloroplatinum" or "cis diamminedichloroplatinum" or "cis dichloridiammineplatinum" or "cis dichlorodiamine platinum" or "cis dichlorodiamine platinum" or "cis dichlorodiammineplatinum" or "cis platinumous diamino dichloride" or "cis platinum" or "cis platinum diamine dichloride" or "cis platinum diaminedichloride" or "cis platinum diamino dichloride" or "cis platinum diaminochloride" or "cis platinum diaminodichloride" or "cis platinum diammine dichloride" or "cis platinum diamminedichloride" or "cisplatin liposomal" or "cisplatin therapeutic implant" or "cisplatin-ebewe" or "cisplatine" or "cisplatino" or "cisplatinum" or "cisplatyl" or "citoplatino" or "cytoplatin" or "cytosplat" or "diamine dichloroplatinum" or "diaminodichloroplatinum" or "diamminedichloroplatinum" or "dichlorodiamine platinum" or "dichlorodiammineplatinum" or "docistin" or "elvecis" or "kemoplat" or "lederplatin" or "lipoplatin" or "liposomal cisplatin" or "mpi 5010" or "mpi5010" or "neoplatin" or "niyaplat" or "nk 801" or "noveldexis" or "nsc 119875" or "platamine" or "platamine rtu" or "platiblastin" or "platidiam" or "platimine" or "platinox" or "platiniol" or "platiniol aq" or "platinoxan" or "platinum diamine dichloride" or "platinum diaminedichloride" or "platinum diaminodichloride" or "platinum diamminedichloride" or "platiran" or "platistil" or "platistin" or "platosin" or "randa" or "romcis" or "sicate" or "spi 077" or "tecnoplatin").ti,ab,sh.

13. ("bortezomib" or "ldp 341" or "ldp341" or "mg 341" or "mg341" or "mln 341" or "mln341" or "ps 341" or "ps341" or "velcade" or "vincristine" or "l 37231" or "l37231" or "vin cristine" or "vincristin" or "vincrisul" or "vinblastine" or "le 29060" or "le29060" or "leukoblastin" or "rozevin" or "vin blastine" or "vinblastin" or "vincaleucoblastin" or "vincaleucoblastine" or "vincaleukoblastine" or "vincoblastin" or "vincoblastine" or "vincoleucoblastine" or "vincoleukoblastin" or "vinleucoblastine").ti,ab,sh.

14. ("thalidomide" or "beta thalidomide" or "contergan" or "distaval" or "isomin" or "k 17" or "kedavon" or "kevadon" or "neurosedine" or "neurosedine" or "nsc 66847" or "sedalis" or "shin naito" or "softenon" or "synovir" or "talimol" or "talizer" or "telagan" or "telargan" or "thado" or "thalidomid" or "thalidomide celgene" or "thalimodide" or "thalix" or "thalamid").ti,ab,sh.

15. or/8-14

16. 7 and 15

17. ((chemo\* or antineoplas\* or anti-neoplas\* or anticancer\* or anti-cancer\* or anticarcino\* or anti-carcino\* or antitumor or anti-tumor or antitumour or anti-tumour or carcinochemo\* or carcinostatic or "tumor inhibitor" or "tumour inhibitor")) adj3 (neuropath\* or neuralgia or neurotox\* or mononeuropath\* or mono-neuropath\* or polyneuropath\* or poly-neuropath\*).ti,ab,oa,kw.

18. 3 or 16 or 17

19. exp Clinical Laboratory Techniques/ or Clinical Laboratory Services/ or exp Laboratories/

20. ((laboratory adj2 (marker or markers or values or test\* or technique\* or service or services or diagnos\* or examin\* or evaluat\*)) or ("lab test" or "lab tests" or "lab result" or "lab results" or "lab value" or "lab values" or deficien\*)).ti,ab,oa,kw.

21. 19 or 20

22. exp Hemoglobins/ or Lipotropic Agents/ or exp Anemia/ or Methylmalonic Acid/ or Malonates/ or exp Homocysteine/ or exp Nutrients/ or Minerals/ or Vitamin A/ or Thiamine/ or Riboflavin/ or Niacinamide/ or Niacin/ or Pantothenic Acid/ or Vitamin B 6/ or Biotin/ or Folic Acid/ or Vitamin B 12/ or Ascorbic Acid/ or Vitamin D/ or Vitamin E/ or Vitamin K/ or Prothrombin Time/ or Calcium/ or Calcium, Dietary/ or Magnesium/ or Phosphorus, Dietary/ or Potassium/ or Potassium, Dietary/ or Sodium, Dietary/ or Chromium/ or Copper/ or Fluorides/ or Iodine/ or Iron/ or Iron, Dietary/ or Manganese/ or Molybdenum/ or Selenium/ or Zinc/

23. (hemoglobin or hemoglobins or haemoglobin or hemoglobine or haemoglobine or haemoglobins or hemoglobulin or hematocrit or ferrohaemoglobin or ferrohemoglobin or erythrocytes or eryhem or albumin or albumen or prealbumin or pre-albumin or total-protein or leptin or globulin or globulins or polyglobulin or poly-globulin or choline or bursine or fagine or vidine or thiamin or thiamine or anemi\* or anaemi\* or aneurin or riboflavin or riboflavine or "flavin mononucleotide" or "flavin-adenine dinucleotide" or niacin or niacinamide or enduramide or nicobion or nicotinamide or nicotinsaureamid or papulex or "pantothenic acid" or "calcium pantothenate" or dexol or "zinc pantothenate" or "pyridoxal phosphate" or "pyridoxal 5-phosphate" or "pyridoxal-P" or biotin or folate or "folic acid" or folacin or folvite or folvit or "pteroylglutamic acid" or cobalamin or cobalamins or cyanocobalamin or eritron or "B1" or "B2" or "B3" or "B5" or "B6" or "B7" or "B9" or "B12" or (B adj ("1" or "2" or "3" or "5" or "6" or "7" or "9" or "12")) or "methylmalonic acid" or "methyl malonate" or "methyl malonic acid" or methylmalonate or retinol or carotene or "Aquasol A" or phyto-menadione or menaquinone or menadione or calcium or chloride or magnesium or phosphorus or romag or potassium or kalium or sodium or chromium or copper or fluoride or iodine or iron or "Fe" or "Fe+++" or ferro or ferrum or manganese or molybdenum or selenium or zinc).ti,ab,oa,kw.

24. 22 or 23

25. 21 and 24

26. (((("complete blood" or "red blood cell" or erythrocyte or RBC or iron or reticulocyte) adj1 (count or indices)) or "CBC" or "hemogram" or (("coronary risk" or lipid or cholesterol or prothrombin or prothrombine or protrombin) adj1 (panel or test)) or Thrombotest or "Fe Tests").ti,ab,oa,kw.

27. (exp "Nutritional and Metabolic Diseases"/ not exp Overnutrition/) or Hypercalciuria/

28. (undernutrition\* or malnutrition\* or avitaminosis or ((nutrition\* or mineral\* or metabolic or nutrient\* or micronutrient\* or micro-nutrient\*) adj2 (deficien\* or diseases or disorder\*))).ti,ab,oa,kw.

29. (beriberi or pellagra or scurvy or rickets or osteomalacia or hypocalcem\* or hypo-calcem\* or hypercalcem\* or hyper-calcem\* or hypocalcaem\* or hypo-calcaem\* or hypercalcaem\* or hyper-calcaem\* or hypocalciur\* or hypo-calciur\* or hypercalciur\* or hyper-calciur\* or hypomagnesium\* or hypo-magnesium\* or hypermagnesium\* or hyper-magnesium\* or hypomagnesaem\* or hypo-magnesaem\* or hypermagnesaem\* or hyper-magnesaem\* or hypoalbuminem\* or hypo-albuminem\* or hyperalbuminem\* or hyper-albuminem\* or hypoalbuminaem\* or hypo-albuminaem\* or hyperalbuminaem\* or hyper-albuminaem\* or hypokalem\* or hypo-kalem\* or hyperkalem\* or hyper-kalem\* or hypokalaem\* or hypo-kalaem\* or hyperkalaem\* or hyper-kalaem\* or hypohomocysteinem\* or hypo-homocysteinem\* or hyperhomocysteinem\* or hyper-homocysteinem\*).ti,ab,oa,kw.

30. 25 or 26 or 27 or 28 or 29

31. 18 and 30

32. 31 not (Animals/ not (Animals/ and Humans/))
33. case reports.pt. or (case adj1 (report\* or series)).ti,ab.
34. 32 not 33
35. 34 not ((exp infant/ or exp child/ or adolescent/) not exp adult/)
36. 34 not (exp adult/ not (exp infant/ or exp child/ or adolescent/))
37. 34 not 36
38. 35 or 37
39. remove duplicates from 38
40. limit 39 to ed=20200101-20301231
41. limit 39 to dt=20200101-20301231
42. 40 or 41

**2. Ovid Embase** 1974 to 2020 June 03– searched June 4, 2020.

*Update:* Ovid **Embase** 1974 to 2021 December 07 – date range searched: January 01, 2020 – current (searched on December 08, 2021).

1. chemotherapy-induced peripheral neuropathy/
2. peripheral neuropathy/
3. ((peripheral adj2 (nerve\* or nervous) adj2 (disease\* or disorder\*)) or "peripheral neuropath\*").ti,ab.
4. (PNS adj2 (disease\* or disorder\*)).ti,ab.
5. 2 or 3 or 4
6. exp chemotherapy/ or antineoplastic agent/ or (antineoplastic or chemotherap\* or chemo-therap\* or ((anticancer\* or anti-cancer\* or anticarcino\* or anti-carcino\* or antitumor or anti-tumor or antitumour\* or anti-tumour\* or carcinostatic) adj2 (therap\* or agent or agents or treatment\* or management\*)) or carcinochemo\* or "tumor inhibitor" or "tumour inhibitor").ti,ab.
7. ("paclitaxel" or "abi 007" or "abi007" or "abraxane" or "albumin bound paclitaxel" or "anzatax" or "apealea" or "asotax" or "biotax" or "bms 181339" or "bms181339" or "bmy 45622" or "bmy45622" or "bristaxol" or "britaxol" or "coroxane" or "dts 301" or "dts301" or "endotag-1" or "formoxol" or "genexol" or "genexol pm" or "hunxol" or "ifaxol" or "infinnium" or "intaxel" or "mbt 0206" or "mbt0206" or "medixel" or "mitotax" or "nab paclitaxel" or "nanoparticle albumin bound paclitaxel" or "nsc 125973" or "nsc 673089" or "nsc125973" or "nsc673089" or "oas pac 100" or "oaspac100" or "oncogel" or "onxol" or "pacitaxel" or "paclitaxel nab" or "pacxel" or "padexol" or "parexel" or "paxceed" or "paxene" or "paxus" or "praxel" or "taxocris" or "taxol" or "taycovit" or "yewtaxan").ti,ab.

8. ("docetaxel" or "daxotel" or "dexotel" or "docefrez" or "docetaxel accord" or "lit 976" or "lit976" or "n debenzoyl n tert butoxycarbonyl 10 deacetyl taxol" or "n tert butoxycarbonyl 10 deacetyl n debenzoyl taxol" or "nsc 628503" or "nsc628503" or "oncodocel" or "rp 56976" or "rp56976" or "taxespira" or "taxoter" or "taxotere" or "texot").ti,ab.

9. ("oxaliplatin" or "axiplatin" or "crisapla" or "croloxat" or "dacotin" or "dacplat" or "ebeoxal" or "elatofen" or "eloxatin" or "eloxatine" or "elplat" or "geneplatin" or "heloxatin" or "lipoxal" or "mbp 426" or "mbp426" or "medoxa" or "oplat" or "oxalatoplatinum" or "oxalatplatin" or "oxali" or "oxalip" or "oxaliplan" or "oxaliplatina" or "oxaliprol" or "oxaliquid" or "oxalisan" or "oxalisin" or "oxalizer" or "oxaltic" or "oxaltina" or "oxaplamyl" or "oxaviatin" or "platox" or "plaxitin" or "rectoxal" or "riboxatin" or "rp 54780" or "rp54780" or "sinoxal" or "sr 96669" or "sr96669" or "transplastin" or "velminox" or "xaliplat" or "xoplan").ti,ab.

10. ("cisplatin" or "abiplatin" or "biocisplatinum" or "biocysplatinum" or "blastolem" or "briplatin" or "cddp ti" or "cis ddp" or "cis diamine dichloroplatinum" or "cis diaminechloroplatinum" or "cis diaminedichloroplatinum" or "cis diammine dichloroplatinum" or "cis diamminedichloroplatinum" or "cis dichloridiammineplatinum" or "cis dichlorodiamine platinum" or "cis dichlorodiamine platinum" or "cis dichlorodiammineplatinum" or "cis platinous diamino dichloride" or "cis platinum" or "cis platinum diamine dichloride" or "cis platinum diaminedichloride" or "cis platinum diamino dichloride" or "cis platinum diaminochloride" or "cis platinum diaminodichloride" or "cis platinum diammine dichloride" or "cis platinum diamminedichloride" or "cisplatin liposomal" or "cisplatin therapeutic implant" or "cisplatin-ebewe" or "cisplatin" or "cisplatino" or "cisplatinum" or "cisplatyl" or "citoplatino" or "cytoplatin" or "cytosplat" or "diamine dichloroplatinum" or "diaminodichloroplatinum" or "diamminedichloroplatinum" or "dichlorodiamine platinum" or "dichlorodiammineplatinum" or "docistin" or "elvecis" or "kemoplat" or "lederplatin" or "lipoplatin" or "liposomal cisplatin" or "mpi 5010" or "mpi5010" or "neoplatin" or "niyaplat" or "nk 801" or "noveldexis" or "nsc 119875" or "platamine" or "platamine rtu" or "platiblastin" or "platidiam" or "platimine" or "platinex" or "platinil" or "platinol" or "platinol aq" or "platinoxan" or "platinum diamine dichloride" or "platinum diaminedichloride" or "platinum diaminodichloride" or "platinum diamminedichloride" or "platiran" or "platistil" or "platistin" or "platosin" or "randa" or "romcis" or "sicate" or "spi 077" or "tecnoplatin").ti,ab.

11. ("bortezomib" or "ldp 341" or "ldp341" or "mg 341" or "mg341" or "mln 341" or "mln341" or "ps 341" or "ps341" or "velcade" or "vincristine" or "l 37231" or "l37231" or "vin cristine" or "vincristin" or "vincrisul" or "vinblastine" or "le 29060" or "le29060" or "leukoblastin" or "rozevin" or "vin blastine" or "vinblastin" or "vincaleucoblastin" or "vincaleucoblastine" or "vincaleukoblastine" or "vincoblastin" or "vincoblastine" or "vincoleucoblastine" or "vincoleukoblastin" or "vinleucoblastine").ti,ab.

12. ("thalidomide" or "beta thalidomide" or "contergan" or "distaval" or "isomin" or "k 17" or "kedavon" or "kevadon" or "neurosedine" or "neurosedine" or "nsc 66847" or "sedalis" or "shin naito" or "softenon" or "synovir" or "talimol" or "talizer" or "telagan" or "telargan" or "thado" or "thalidomid" or "thalidomide celgene" or "thalimodide" or "thalix" or "thalomid").ti,ab.

13. 6 or 7 or 8 or 9 or 10 or 11 or 12

14. 5 and 13

15. ((chemo\* or antineoplas\* or anti-neoplas\* or anticancer\* or anti-cancer\* or anticarcino\* or anti-carcino\* or antitumor or anti-tumor or antitumour or anti-tumour or carcinochemo\* or carcinostatic or "tumor inhibitor" or "tumour inhibitor") adj3 (neuropath\* or neuralgia or neurotox\* or mononeuropath\* or mono-neuropath\* or polyneuropath\* or poly-neuropath\*)).ti,ab.

16. 1 or 14 or 15

17. exp \*laboratory technique/ or \*clinical laboratory service/ or exp \*laboratory diagnosis/

18. ((laboratory adj2 (marker or markers or values or test\* or technique\* or service or services or diagnos\* or examin\* or evaluat\*)) or ("lab test" or "lab tests" or "lab result" or "lab results" or "lab value" or "lab values" or deficien\*)).ti,ab.

19. 17 or 18

20. exp \*hemoglobin/ or \*lipotropic agent/ or exp \*anemia/ or \*methylmalonic acid/ or \*malonic acid derivative/ or \*homocysteine/ or exp \*nutrient/ or \*mineral/ or exp \*carotenoid/ or \*thiamine/ or \*riboflavin/ or \*nicotinamide/ or \*nicotinic acid/ or \*pantothenic acid/ or \*pyridoxine/ or \*biotin/ or \*folic acid/ or \*cyanocobalamin/ or exp \*ascorbic acid/ or exp \*vitamin D/ or \*prothrombin time/ or \*calcium/ or \*magnesium/ or \*phosphorus/ or \*potassium/ or \*sodium/ or \*chromium/ or \*copper/ or \*fluoride/ or \*iodine/ or \*iron/ or \*manganese/ or \*molybdenum/ or \*selenium/ or \*zinc/

21. (hemoglobin or hemoglobins or haemoglobin or hemoglobine or haemoglobine or haemoglobins or hemoglobulin or hematocrit or ferrohaemoglobin or ferrohemoglobin or erythrocytes or eryhem or albumin or albumen or prealbumin or pre-albumin or total-protein or leptin or globulin or globulins or polyglobulin or poly-globulin or choline or bursine or fagine or vidine or thiamin or thiamine or anemi\* or anaemi\* or aneurin or riboflavin or riboflavine or "flavin mononucleotide" or "flavin-adenine dinucleotide" or niacin or niacinamide or enduramide or nicobion or nicotinamide or nicotinsaureamid or papulex or "pantothenic acid" or "calcium pantothenate" or dexol or "zinc pantothenate" or "pyridoxal phosphate" or "pyridoxal 5-phosphate" or "pyridoxal-P" or biotin or folate or "folic acid" or folacin or folvite or folvit or "pteroylglutamic acid" or cobalamin or cobalamins or cyanocobalamin or eritron or "B1" or "B2" or "B3" or "B5" or "B6" or "B7" or "B9" or "B12" or (B adj ("1" or "2" or "3" or "5" or "6" or "7" or "9" or "12")) or "methylmalonic acid" or "methyl malonate" or "methyl malonic acid" or methylmalonate or retinol or carotene or "Aquasol A" or phytomenadione or menaquinone or menadione or calcium or chloride or magnesium or phosphorus or romag or potassium or kalium or sodium or chromium or copper or fluoride or iodine or iron or "Fe" or "Fe+++" or ferro or ferrum or manganese or molybdenum or selenium or zinc).ti,ab.

22. 20 or 21

23. 19 and 22

24. (((("complete blood" or "red blood cell" or erythrocyte or RBC or iron or reticulocyte) adj1 (count or indices)) or "CBC" or "hemogram" or (("coronary risk" or lipid or cholesterol or prothrombin or prothrombine or protrombin) adj1 (panel or test)) or Thrombotest or "Fe Tests").ti,ab.

25. exp \*nutritional disorder/ or hypercalciuria/ or exp \*metabolic disorder/

26. (undernutrition\* or malnutrition\* or avitaminosis or ((nutrition\* or mineral\* or metabolic or nutrient\* or micronutrient\* or micro-nutrient\*) adj2 (deficien\* or diseases or disorder\*))).ti,ab.

27. (beriberi or pellagra or scurvy or rickets or osteomalacia or hypocalcem\* or hypo-calcem\* or hypercalcem\* or hyper-calcem\* or hypocalcaem\* or hypo-calcaem\* or hypercalcaem\* or hyper-calcaem\* or hypocalciur\* or hypo-calciur\* or hypercalciur\* or hyper-calciur\* or hypomagnesium\* or hypo-magnesium\* or hypermagnesium\* or hyper-magnesium\* or hypomagnesaem\* or hypo-magnesaem\* or hypermagnesaem\* or hyper-magnesaem\* or hypoalbuminem\* or hypo-albuminem\* or hyperalbuminem\* or hyper-albuminem\* or hypoalbuminaem\* or hypo-albuminaem\* or hyperalbuminaem\* or hyper-albuminaem\* or hypokalem\* or hypo-kalem\* or hyperkalem\* or hyper-kalem\* or hypokalaem\* or hypo-kalaem\* or hyperkalaem\* or hyper-kalaem\* or hypohomocysteinem\* or hypo-homocysteinem\* or hyperhomocysteinem\* or hyper-homocysteinem\*).ti,ab.

28. 23 or 24 or 25 or 26 or 27

29. 16 and 28

30. 29 not ((exp animal/ or nonhuman/) not exp human/)

31. 30 not (case adj1 (report\* or series)).ti,ab.

32. 31 not (exp juvenile/ not exp adult/)

33. 31 not (exp adult/ not exp juvenile/)

34. 31 not 33

35. 32 or 34

36. remove duplicates from 35

37. [limit 36 to dc=20200101-20301231](#)

**3. Ovid EBM Reviews - Cochrane Central Register of Controlled Trials** 1991 to May 2020 – searched June 4, 2020.

*Update:* Ovid EBM Reviews - [Cochrane Central Register of Controlled Trials](#) 1991 to November 2021 – date range searched: January 01, 2021 – current (searched on December 08, 2021).

1. ((peripheral adj2 (nerve\* or nervous) adj2 (disease\* or disorder\*)) or "peripheral neuropath\*").ti,ab.

2. (PNS adj2 (disease\* or disorder\*)).ti,ab.

3. 1 or 2



4. ("paclitaxel" or "abi 007" or "abi007" or "abraxane" or "albumin bound paclitaxel" or "anzatax" or "apealea" or "asotax" or "biotax" or "bms 181339" or "bms181339" or "bmy 45622" or "bmy45622" or "bristaxol" or "britaxol" or "coroxane" or "dts 301" or "dts301" or "endotag-1" or "formoxol" or "genexol" or "genexol pm" or "hunxol" or "ifaxol" or "infinium" or "intaxel" or "mbt 0206" or "mbt0206" or "medixel" or "mitotax" or "nab paclitaxel" or "nanoparticle albumin bound paclitaxel" or "nsc 125973" or "nsc 673089" or "nsc125973" or "nsc673089" or "oas pac 100" or "oaspac100" or "oncogel" or "onxol" or "pacitaxel" or "paclitaxel nab" or "pacxel" or "padexol" or "parexel" or "paxceed" or "paxene" or "paxus" or "praxel" or "taxocris" or "taxol" or "taycovit" or "yewtaxan").ti,ab.

5. ("docetaxel" or "daxotel" or "dexotel" or "docefrez" or "docetaxel accord" or "lit 976" or "lit976" or "n debenzoyl n tert butoxycarbonyl 10 deacetyl taxol" or "n tert butoxycarbonyl 10 deacetyl n debenzoyl taxol" or "nsc 628503" or "nsc628503" or "oncodocel" or "rp 56976" or "rp56976" or "taxespira" or "taxoter" or "taxotere" or "texot").ti,ab.

6. ("oxaliplatin" or "axi platin" or "crisapla" or "croloxat" or "dacotin" or "dacplat" or "ebeoxal" or "elatofen" or "eloxatin" or "eloxatine" or "elplat" or "geneplatin" or "heloxatin" or "lipoxal" or "mbp 426" or "mbp426" or "medoxa" or "oplat" or "oxalatoplatinum" or "oxalatplatin" or "oxali" or "oxalip" or "oxaliplan" or "oxaliplatina" or "oxaliprol" or "oxaliquid" or "oxalisan" or "oxalisin" or "oxalizer" or "oxaltic" or "oxaltina" or "oxaplaml" or "oxaviatin" or "platox" or "plaxitin" or "rectoxal" or "riboxatin" or "rp 54780" or "rp54780" or "sinoxal" or "sr 96669" or "sr96669" or "transplastin" or "velminox" or "xaliplat" or "xoplan").ti,ab.

7. ("cisplatin" or "abi platin" or "biocisplatinum" or "biocysplatinum" or "blastolem" or "briplatin" or "cddp ti" or "cis ddp" or "cis diamine dichloroplatinum" or "cis diaminechloroplatinum" or "cis diaminedichloroplatinum" or "cis diammine dichloroplatinum" or "cis diamminedichloroplatinum" or "cis dichlorodiammineplatinum" or "cis dichlorodiamine platinum" or "cis dichlorodiamine platinum" or "cis dichlorodiammineplatinum" or "cis platinumous diamino dichloride" or "cis platinum" or "cis platinum diamine dichloride" or "cis platinum diaminedichloride" or "cis platinum diamino dichloride" or "cis platinum diaminochloride" or "cis platinum diaminodichloride" or "cis platinum diammine dichloride" or "cis platinum diamminedichloride" or "cisplatin liposomal" or "cisplatin therapeutic implant" or "cisplatin-ebewe" or "cisplatine" or "cisplatino" or "cisplatinum" or "cisplatyl" or "citoplatino" or "cytoplatin" or "cytosplat" or "diamine dichloroplatinum" or "diaminodichloroplatinum" or "diamminedichloroplatinum" or "dichlorodiamine platinum" or "dichlorodiammineplatinum" or "docistin" or "elvecis" or "kemoplat" or "lederplatin" or "lipoplatin" or "liposomal cisplatin" or "mpi 5010" or "mpi5010" or "neoplatin" or "niyaplat" or "nk 801" or "noveldexis" or "nsc 119875" or "platamine" or "platamine rtu" or "platiblastin" or "platidiam" or "platimine" or "platinex" or "platinil" or "platinol" or "platinol aq" or "platinoxan" or "platinum diamine dichloride" or "platinum diaminedichloride" or "platinum diaminodichloride" or "platinum diamminedichloride" or "platiran" or "platistil" or "platistin" or "platosin" or "randa" or "romcis" or "sicate" or "spi 077" or "tecnoplatin").ti,ab.

8. ("bortezomib" or "ldp 341" or "ldp341" or "mg 341" or "mg341" or "mln 341" or "mln341" or "ps 341" or "ps341" or "velcade" or "vincristine" or "l 37231" or "l37231" or "vin cristine" or "vincristin" or "vincrisul" or "vinblastine" or "le 29060" or "le29060" or "leukoblastin" or "rozevin" or "vin blastine" or

"vinblastin" or "vincaleucoblastin" or "vincaleucoblastine" or "vincaleukoblastine" or "vincoblastin" or "vincoblastine" or "vincoleucoblastine" or "vincoleukoblastin" or "vinleucoblastine").ti,ab.

9. ("thalidomide" or "beta thalidomide" or "contergan" or "distaval" or "isomin" or "k 17" or "kedavon" or "kevadon" or "neurosedin" or "neurosedyne" or "nsc 66847" or "sedalis" or "shin naito" or "softenon" or "synovir" or "talimol" or "talizer" or "telagan" or "telargan" or "thado" or "thalidomid" or "thalidomide celgene" or "thalimodide" or "thalix" or "thalomid").ti,ab.

10. (antineoplastic or chemotherap\* or chemo-therap\* or ((anticancer\* or anti-cancer\* or anticarcino\* or anti-carcino\* or antitumor or anti-tumor or antitumour\* or anti-tumour\* or carcinostatic) adj2 (therap\* or agent or agents or treatment\* or management\*)) or carcinochemo\* or "tumor inhibitor" or "tumour inhibitor").ti,ab.

11. 4 or 5 or 6 or 7 or 8 or 9 or 10

12. 3 and 11

13. ((chemo\* or antineoplas\* or anti-neoplas\* or anticancer\* or anti-cancer\* or anticarcino\* or anti-carcino\* or antitumor or anti-tumor or antitumour or anti-tumour or carcinochemo\* or carcinostatic or "tumor inhibitor" or "tumour inhibitor") adj3 (neuropath\* or neuralgia or neurotox\* or mononeuropath\* or mono-neuropath\* or polyneuropath\* or poly-neuropath\*)).ti,ab.

14. 12 or 13

15. ((laboratory adj2 (marker or markers or values or test\* or technique\* or service or services or diagnos\* or examin\* or evaluat\*)) or ("lab test" or "lab tests" or "lab result" or "lab results" or "lab value" or "lab values" or deficien\*))ti,ab.

16. (hemoglobin or hemoglobins or haemoglobin or hemoglobine or haemoglobine or haemoglobins or hemoglobulin or hematocrit or ferrohaemoglobin or ferrohemoglobin or erythrocytes or eryhem or albumin or albumen or prealbumin or pre-albumin or total-protein or leptin or globulin or globulins or polyglobulin or poly-globulin or choline or bursine or fagine or vidine or thiamin or thiamine or anemi\* or anaemi\* or aneurin or riboflavin or riboflavine or "flavin mononucleotide" or "flavin-adenine dinucleotide" or niacin or niacinamide or enduramide or nicobion or nicotinamide or nicotinsaureamid or papulex or "pantothenic acid" or "calcium pantothenate" or dexol or "zinc pantothenate" or "pyridoxal phosphate" or "pyridoxal 5-phosphate" or "pyridoxal-P" or biotin or folate or "folic acid" or folacin or folvite or folvit or "pteroylglutamic acid" or cobalamin or cobalamins or cyanocobalamin or eritron or "B1" or "B2" or "B3" or "B5" or "B6" or "B7" or "B9" or "B12" or (B adj ("1" or "2" or "3" or "5" or "6" or "7" or "9" or "12")) or "methylmalonic acid" or "methyl malonate" or "methyl malonic acid" or methylmalonate or retinol or carotene or "Aquasol A" or phytomenadione or menaquinone or menadione or calcium or chloride or magnesium or phosphorus or romag or potassium or kalium or sodium or chromium or copper or fluoride or iodine or iron or "Fe" or "Fe+++" or ferro or ferrum or manganese or molybdenum or selenium or zinc).ti,ab.

17. 15 and 16

18. (((("complete blood" or "red blood cell" or erythrocyte or RBC or iron or reticulocyte) adj1 (count or indices)) or "CBC" or "hemogram" or (("coronary risk" or lipid or cholesterol or prothrombin or prothrombine or protrombin) adj1 (panel or test)) or Thrombotest or "Fe Tests").ti,ab.
19. (undernutrition\* or malnutrition\* or avitaminosis or ((nutrition\* or mineral\* or metabolic or nutrient\* or micronutrient\* or micro-nutrient\*) adj2 (deficien\* or diseases or disorder\*))).ti,ab.
20. (beriberi or pellagra or scurvy or rickets or osteomalacia or hypocalcem\* or hypo-calcem\* or hypercalcem\* or hyper-calcem\* or hypocalcaem\* or hypo-calcaem\* or hypercalcaem\* or hyper-calcaem\* or hypocalciur\* or hypo-calciur\* or hypercalciur\* or hyper-calciur\* or hypomagnesium\* or hypo-magnesium\* or hypermagnesium\* or hyper-magnesium\* or hypomagnesaem\* or hypo-magnesaem\* or hypermagnesaem\* or hyper-magnesaem\* or hypoalbuminem\* or hypo-albuminem\* or hyperalbuminem\* or hyper-albuminem\* or hypoalbuminaem\* or hypo-albuminaem\* or hyperalbuminaem\* or hyper-albuminaem\* or hypokalem\* or hypo-kalem\* or hyperkalem\* or hyper-kalem\* or hypokalaem\* or hypo-kalaem\* or hyperkalaem\* or hyper-kalaem\* or hypohomocysteinem\* or hypo-homocysteinem\* or hyperhomocysteinem\* or hyper-homocysteinem\*).ti,ab.
21. 17 or 18 or 19 or 20
22. 14 and 21
- 23      [limit 22 to yr="2020 -Current"](#)

**4. Ovid EBM Reviews - Cochrane Database of Systematic Reviews** 2005 to June 03, 2020 – searched June 4, 2020.

1. ((peripheral adj2 (nerve\* or nervous) adj2 (disease\* or disorder\*)) or "peripheral neuropath\*).ti,ab.
2. (PNS adj2 (disease\* or disorder\*).ti,ab.
3. 1 or 2
4. ("paclitaxel" or "abi 007" or "abi007" or "abraxane" or "albumin bound paclitaxel" or "anzatax" or "apealea" or "asotax" or "biotax" or "bms 181339" or "bms181339" or "bmy 45622" or "bmy45622" or "bristaxol" or "britaxol" or "coroxane" or "dts 301" or "dts301" or "endotag-1" or "formoxol" or "genexol" or "genexol pm" or "hunxol" or "ifaxol" or "infinium" or "intaxel" or "mbt 0206" or "mbt0206" or "medixel" or "mitotax" or "nab paclitaxel" or "nanoparticle albumin bound paclitaxel" or "nsc 125973" or "nsc 673089" or "nsc125973" or "nsc673089" or "oas pac 100" or "oaspac100" or "oncogel" or "onxol" or "pacitaxel" or "paclitaxel nab" or "pacxel" or "padexol" or "parexel" or "paxceed" or "paxene" or "paxus" or "praxel" or "taxocris" or "taxol" or "taycovit" or "yewtaxan").ti,ab.
5. ("docetaxel" or "daxotel" or "dexotel" or "docefrez" or "docetaxel accord" or "lit 976" or "lit976" or "n debenzoyl n tert butoxycarbonyl 10 deacetylaxol" or "n tert butoxycarbonyl 10 deacetyl n debenzoylaxol" or "nsc 628503" or "nsc628503" or "oncodocel" or "rp 56976" or "rp56976" or "taxespira" or "taxoter" or "taxotere" or "texot").ti,ab.

6. ("oxaliplatin" or "axiplatin" or "crisapla" or "croloxat" or "dacotin" or "dacplat" or "ebeoxal" or "elatofen" or "eloxatin" or "eloxatine" or "elplat" or "geneplatin" or "heloxatin" or "lipoxal" or "mbp 426" or "mbp426" or "medoxa" or "oplat" or "oxalatoplatinum" or "oxalatplatin" or "oxali" or "oxalip" or "oxaliplan" or "oxaliplatina" or "oxaliprol" or "oxaliquid" or "oxalisan" or "oxalisin" or "oxalizor" or "oxaltic" or "oxaltina" or "oxaplamyl" or "oxaviatin" or "platox" or "plaxitin" or "rectoxal" or "riboxatin" or "rp 54780" or "rp54780" or "sinoxal" or "sr 96669" or "sr96669" or "transplastin" or "velminox" or "xaliplat" or "xoplan").ti,ab.

7. ("cisplatin" or "abiplatin" or "biocisplatinum" or "biocysplatinum" or "blastolem" or "briplatin" or "cddp ti" or "cis ddp" or "cis diamine dichloroplatinum" or "cis diaminechloroplatinum" or "cis diaminedichloroplatinum" or "cis diammine dichloroplatinum" or "cis diamminedichloroplatinum" or "cis dichloridiammineplatinum" or "cis dichlorodiamine platinum" or "cis dichlorodiamine platinum" or "cis dichlorodiammineplatinum" or "cis platinous diamino dichloride" or "cis platinum" or "cis platinum diamine dichloride" or "cis platinum diaminedichloride" or "cis platinum diamino dichloride" or "cis platinum diaminochloride" or "cis platinum diaminodichloride" or "cis platinum diammine dichloride" or "cis platinum diamminedichloride" or "cisplatin liposomal" or "cisplatin therapeutic implant" or "cisplatin-ebewe" or "cisplatine" or "cisplatino" or "cisplatinum" or "cisplatyl" or "citoplatino" or "cytoplatin" or "cytosplat" or "diamine dichloroplatinum" or "diaminodichloroplatinum" or "diamminedichloroplatinum" or "dichlorodiamine platinum" or "dichlorodiammineplatinum" or "docistin" or "elvecis" or "kemoplat" or "lederplatin" or "lipoplatin" or "liposomal cisplatin" or "mpi 5010" or "mpi5010" or "neoplatin" or "niyaplat" or "nk 801" or "noveldexis" or "nsc 119875" or "platamine" or "platamine rtu" or "platiblastin" or "platidiam" or "platimine" or "platinex" or "platinil" or "platinol" or "platinol aq" or "platinoxan" or "platinum diamine dichloride" or "platinum diaminedichloride" or "platinum diaminodichloride" or "platinum diamminedichloride" or "platiran" or "platistil" or "platistin" or "platosin" or "randa" or "romcis" or "sicate" or "spi 077" or "tecnoplatin").ti,ab.

8. ("bortezomib" or "ldp 341" or "ldp341" or "mg 341" or "mg341" or "mln 341" or "mln341" or "ps 341" or "ps341" or "velcade" or "vincristine" or "l 37231" or "l37231" or "vin cristine" or "vincristin" or "vincrisul" or "vinblastine" or "le 29060" or "le29060" or "leukoblastin" or "rozevin" or "vin blastine" or "vinblastin" or "vincaleucoblastin" or "vincaleucoblastine" or "vincaleukoblastine" or "vincoblastin" or "vincoblastine" or "vincoleucoblastine" or "vincoleukoblastin" or "vinleucoblastine").ti,ab.

9. ("thalidomide" or "beta thalidomide" or "contergan" or "distaval" or "isomin" or "k 17" or "kedavon" or "kevadon" or "neurosedine" or "neurosedine" or "nsc 66847" or "sedalis" or "shin naito" or "softenon" or "synovir" or "talimol" or "talizer" or "telagan" or "telargan" or "thado" or "thalidomid" or "thalidomide celgene" or "thalimodide" or "thalix" or "thalomid").ti,ab.

10. (antineoplastic or chemotherap\* or chemo-therap\* or ((anticancer\* or anti-cancer\* or anticarcino\* or anti-carcino\* or antitumor or anti-tumor or antitumour\* or anti-tumour\* or carcinostatic) adj2 (therap\* or agent or agents or treatment\* or management\*)) or carcinochemo\* or "tumor inhibitor" or "tumour inhibitor").ti,ab.

11. 4 or 5 or 6 or 7 or 8 or 9 or 10

12. 3 and 11

13. ((chemo\* or antineoplas\* or anti-neoplas\* or anticancer\* or anti-cancer\* or anticarcino\* or anti-carcino\* or antitumor or anti-tumor or antitumour or anti-tumour or carcinochemo\* or carcinostatic or "tumor inhibitor" or "tumour inhibitor") adj3 (neuropath\* or neuralgia or neurotox\* or mononeuropath\* or mono-neuropath\* or polyneuropath\* or poly-neuropath\*)).ti,ab.

14. 12 or 13

15. ((laboratory adj2 (marker or markers or values or test\* or technique\* or service or services or diagnos\* or examin\* or evaluat\*)) or ("lab test" or "lab tests" or "lab result" or "lab results" or "lab value" or "lab values" or deficien\*)).ti,ab.

16. (hemoglobin or hemoglobins or haemoglobin or hemoglobine or haemoglobine or haemoglobins or hemoglobulin or hematocrit or ferrohaemoglobin or ferrohemo-globin or erythrocytes or eryhem or albumin or albumen or prealbumin or pre-albumin or total-protein or leptin or globulin or globulins or polyglobulin or poly-globulin or choline or bursine or fagine or vidine or thiamin or thiamine or anemi\* or anaemi\* or aneurin or riboflavin or riboflavine or "flavin mononucleotide" or "flavin-adenine dinucleotide" or niacin or niacinamide or enduramide or nicobion or nicotinamide or nicotinsaureamid or papulex or "pantothenic acid" or "calcium pantothenate" or dexol or "zinc pantothenate" or "pyridoxal phosphate" or "pyridoxal 5-phosphate" or "pyridoxal-P" or biotin or folate or "folic acid" or folacin or folvite or folvit or "pteroylglutamic acid" or cobalamin or cobalamins or cyanocobalamin or eritron or "B1" or "B2" or "B3" or "B5" or "B6" or "B7" or "B9" or "B12" or (B adj ("1" or "2" or "3" or "5" or "6" or "7" or "9" or "12")) or "methylmalonic acid" or "methyl malonate" or "methyl malonic acid" or methylmalonate or retinol or carotene or "Aquasol A" or phytomenadione or menaquinone or menadione or calcium or chloride or magnesium or phosphorus or romag or potassium or kalium or sodium or chromium or copper or fluoride or iodine or iron or "Fe" or "Fe+++" or ferro or ferrum or manganese or molybdenum or selenium or zinc).ti,ab.

17. 15 and 16

18. (((("complete blood" or "red blood cell" or erythrocyte or RBC or iron or reticulocyte) adj1 (count or indices)) or "CBC" or "hemogram" or (("coronary risk" or lipid or cholesterol or prothrombin or prothrombine or protrombin) adj1 (panel or test)) or Thrombotest or "Fe Tests").ti,ab.

19. (undernutrition\* or malnutrition\* or avitaminosis or ((nutrition\* or mineral\* or metabolic or nutrient\* or micronutrient\* or micro-nutrient\*) adj2 (deficien\* or diseases or disorder\*))).ti,ab.

20. (beriberi or pellagra or scurvy or rickets or osteomalacia or hypocalcem\* or hypo-calcem\* or hypercalcem\* or hyper-calcem\* or hypocalcaem\* or hypo-calcaem\* or hypercalcaem\* or hyper-calcaem\* or hypocalciur\* or hypo-calciur\* or hypercalciur\* or hyper-calciur\* or hypomagnesem\* or hypo-magnesem\* or hypermagnesem\* or hyper-magnesem\* or hypomagnesaem\* or hypo-magnesaem\* or hypermagnesaem\* or hyper-magnesaem\* or hypoalbuminem\* or hypo-albuminem\* or hyperalbuminem\* or hyper-albuminem\* or hypoalbuminaem\* or hypo-albuminaem\* or hyperalbuminaem\* or hyper-albuminaem\* or hypokalem\* or hypo-kalem\* or hyperkalem\* or hyper-kalem\* or hypokalaem\* or hypo-kalaem\* or hyperkalaem\* or hyper-kalaem\* or hypohomocysteinem\* or hypo-homocysteinem\* or hyperhomocysteinem\* or hyper-homocysteinem\*).ti,ab.

21. 17 or 18 or 19 or 20

22. 14 and 21

*Update:* Ovid EBM Reviews - [Cochrane Database of Systematic Reviews](#) 2005 to December 02, 2021 – date range searched: January 01, 2020 – current (searched on December 08, 2021).

1 ((peripheral adj2 (nerve\* or nervous) adj2 (disease\* or disorder\*)) or "peripheral neuropath\*").ti,ab.

2 (PNS adj2 (disease\* or disorder\*)).ti,ab.

3 1 or 2

Filter By Specific Date Year Range, From: 2020, To: 2030

**5. Scopus** Date range: 1823 to June 04, 2020 – searched June 04, 2020.

(((((TITLE-ABS-KEY ( ( peripheral W/2 ( nerve\* OR nervous ) W/2 ( disease\* OR disorder\* ) ) OR "peripheral neuropath\*" ) ) OR ( TITLE-ABS-KEY ( pns W/2 ( disease\* OR disorder\* ) ) ) ) AND ( ( TITLE-ABS-KEY ( antineoplastic OR chemotherap\* OR chemo-therap\* OR ( ( anticancer\* OR anti-cancer\* OR anticarcino\* OR anti-carcino\* OR antitumor OR anti-tumor OR antitumour\* OR anti-tumour\* OR carcinostatic ) W/2 ( therap\* OR agent OR agents OR treatment\* OR management\* ) ) OR carcinochemo\* OR "tumor inhibitor" OR "tumour inhibitor" ) ) OR ( TITLE-ABS-KEY ( "paclitaxel" OR "abi 007" OR "abi007" OR "abraxane" OR "albumin bound paclitaxel" OR "anzatax" OR "apealea" OR "asotax" OR "biotax" OR "bms 181339" OR "bms181339" OR "bmy 45622" OR "bmy45622" OR "bristaxol" OR "britaxol" OR "coroxane" OR "dts 301" OR "dts301" OR "endotag-1" OR "formoxol" OR "genexol" OR "genexol pm" OR "hunxol" OR "ifaxol" OR "infinium" OR "intaxel" OR "mbt 0206" OR "mbt0206" OR "medixel" OR "mitotax" OR "nab paclitaxel" OR "nanoparticle albumin bound paclitaxel" OR "nsc 125973" OR "nsc 673089" OR "nsc125973" OR "nsc673089" OR "oas pac 100" OR "oaspac100" OR "oncogel" OR "onxol" OR "pacitaxel" OR "paclitaxel nab" OR "paxcel" OR "padexol" OR "parexel" OR "paxceed" OR "paxene" OR "paxus" OR "praxel" OR "taxocris" OR "taxol" OR "taycovit" OR "yewtaxan" ) ) OR ( TITLE-ABS-KEY ( "docetaxel" OR "daxotel" OR "dexotel" OR "docefrez" OR "docetaxel accord" OR "lit 976" OR "lit976" OR "n debenzoyl n tert butoxycarbonyl 10 deacetyl taxol" OR "n tert butoxycarbonyl 10 deacetyl n debenzoyl taxol" OR "nsc 628503" OR "nsc628503" OR "oncodocel" OR "rp 56976" OR "rp56976" OR "taxespira" OR "taxoter" OR "taxotere" OR "texot" ) ) OR ( TITLE-ABS-KEY ( "oxaliplatin" OR "axiplatin" OR "crisapla" OR "croloxat" OR "dacotin" OR "dacplat" OR "ebeoxal" OR "elatofen" OR "eloxatin" OR "eloxatine" OR "elplat" OR "geneplatin" OR "heloxatin" OR "lipoxal" OR "mbp 426" OR "mbp426" OR "medoxa" OR "oplat" OR "oxalatoplatinum" OR "oxalatplatin" OR "oxali" OR "oxalip" OR "oxaliplan" OR "oxaliplatina" OR "oxaliprol" OR "oxaliquid" OR "oxalisan" OR "oxalisin" OR "oxalizer" OR "oxaltic" OR "oxaltina" OR "oxaplami" OR "oxaviatin" OR "platox" OR "plaxitin" OR "rectoxal" OR "riboxatin" OR "rp 54780" OR "rp54780" OR "sinoxal" OR "sr 96669" OR "sr96669" OR "transplastin" OR "velminox" OR "xaliplat" OR "xoplan" ) ) OR ( TITLE-ABS-KEY ( "cisplatin" OR "abiplatin" OR "biocisplatinum" OR

"biocysplatinum" OR "blastolem" OR "briplatin" OR "cddp ti" OR "cis ddp" OR "cis diamine  
 dichloroplatinum" OR "cis diaminechloroplatinum" OR "cis diaminedichloroplatinum" OR "cis diamine  
 dichloroplatinum" OR "cis diamminedichloroplatinum" OR "cis dichloridiammineplatinum" OR "cis  
 dichlorodiamine platinum" OR "cis dichlorodiamine platinum" OR "cis dichlorodiammineplatinum" OR  
 "cis platinous diamino dichloride" OR "cis platinum" OR "cis platinum diamine dichloride" OR "cis  
 platinum diaminedichloride" OR "cis platinum diamino dichloride" OR "cis platinum diaminochloride"  
 OR "cis platinum diaminodichloride" OR "cis platinum diammine dichloride" OR "cis platinum  
 diamminedichloride" OR "cisplatin liposomal" OR "cisplatin therapeutic implant" OR "cisplatin-ebewe"  
 OR "cisplatine" OR "cisplatino" OR "cisplatinum" OR "cisplatyl" OR "citoplatino" OR "cytoplatin" OR  
 "cytosplat" OR "diamine dichloroplatinum" OR "diaminodichloroplatinum" OR  
 "diamminedichloroplatinum" OR "dichlorodiamine platinum" OR "dichlorodiammineplatinum" OR  
 "docistin" OR "elvecis" OR "kemoplat" OR "lederplatin" OR "lipoplatin" OR "liposomal cisplatin" OR  
 "mpi 5010" OR "mpi5010" OR "neoplatin" OR "niyaplat" OR "nk 801" OR "noveldexis" OR "nsc  
 119875" OR "platamine" OR "platamine rtu" OR "platiblastin" OR "platidiam" OR "platimine" OR  
 "platinex" OR "platinil" OR "platinol" OR "platinol aq" OR "platinoxan" OR "platinum diamine  
 dichloride" OR "platinum diaminedichloride" OR "platinum diaminodichloride" OR "platinum  
 diamminedichloride" OR "platiran" OR "platistil" OR "platistin" OR "platosin" OR "randa" OR "romcis"  
 OR "sicate" OR "spi 077" OR "tecnoplatin" ) ) OR ( TITLE-ABS-KEY ( "bortezomib" OR "ldp 341"  
 OR "ldp341" OR "mg 341" OR "mg341" OR "mln 341" OR "mln341" OR "ps 341" OR "ps341" OR  
 "velcade" OR "vincristine" OR "l 37231" OR "l37231" OR "vin cristine" OR "vincristin" OR "vincrisul"  
 OR "vinblastine" OR "le 29060" OR "le29060" OR "leukoblastin" OR "rozevin" OR "vin blastine" OR  
 "vinblastin" OR "vincaleucoblastin" OR "vincaleucoblastine" OR "vincaleukoblastine" OR "vincoblastin"  
 OR "vincoblastine" OR "vincoleucoblastine" OR "vincoleukoblastin" OR "vinleucoblastine" ) ) OR (  
 TITLE-ABS-KEY ( "thalidomide" OR "beta thalidomide" OR "contergan" OR "distaval" OR "isomin"  
 OR "k 17" OR "kedavon" OR "kevadon" OR "neurosedine" OR "neurosedine" OR "nsc 66847" OR  
 "sedalis" OR "shin naito" OR "softenon" OR "synovir" OR "talimol" OR "talizer" OR "telagan" OR  
 "telargan" OR "thado" OR "thalidomid" OR "thalidomide celgene" OR "thalimodide" OR "thalix" OR  
 "thalomid" ) ) ) OR ( TITLE-ABS-KEY ( ( chemo\* OR antineoplas\* OR anti-neoplas\* OR anticancer\*  
 OR anti-cancer\* OR anticarcino\* OR anti-carcino\* OR antitumor OR anti-tumor OR antitumour OR anti-  
 tumour OR carcinochemo\* OR carcinostatic OR "tumor inhibitor" OR "tumour inhibitor" ) W/3 (   
 neuropath\* OR neuralgia OR neurotox\* OR mononeuropath\* OR mono-neuropath\* OR polyneuropath\*  
 OR poly-neuropath\* ) ) ) AND ( ( ( TITLE-ABS-KEY ( ( laboratory W/2 ( marker OR markers OR  
 values OR test\* OR technique\* OR service OR services OR diagnos\* OR examin\* OR evaluat\* ) ) OR (   
 "lab test" OR "lab tests" OR "lab result" OR "lab results" OR "lab value" OR "lab values" OR deficien\* )  
 ) ) AND ( TITLE-ABS-KEY ( hemoglobin OR hemoglobins OR haemoglobin OR hemoglobine OR  
 haemoglobine OR haemoglobins OR hemoglobulin OR hematocrit OR ferrohaemoglobin OR  
 ferrohämoglobin OR erythrocytes OR eryhem OR albumin OR albumen OR prealbumin OR pre-albumin  
 OR total-protein OR leptin OR globulin OR globulins OR polyglobulin OR poly-globulin OR choline OR  
 bursine OR fagine OR vidine OR thiamin OR thiamine OR anemi\* OR anaemi\* OR aneurin OR  
 riboflavin OR riboflavine OR "flavin mononucleotide" OR "flavin-adenine dinucleotide" OR niacin OR  
 niacinamide OR enduramide OR nicobion OR nicotinamide OR nicotinsaureamid OR papulex OR  
 "pantothenic acid" OR "calcium pantothenate" OR dexol OR "zinc pantothenate" OR "pyridoxal  
 phosphate" OR "pyridoxal 5-phosphate" OR "pyridoxal-P" OR biotin OR folate OR "folic acid" OR  
 folacin OR folvite OR folvit OR "pteroylglutamic acid" OR cobalamin OR cobalamins OR

cyanocobalamin OR eritron OR "B1" OR "B2" OR "B3" OR "B5" OR "B6" OR "B7" OR "B9" OR  
 "B12" OR ( b W/1 ( "1" OR "2" OR "3" OR "5" OR "6" OR "7" OR "9" OR "12" ) ) OR "methylmalonic  
 acid" OR "methyl malonate" OR "methyl malonic acid" OR methylmalonate OR retinol OR carotene OR  
 "Aquasol A" OR phytomenadione OR menaquinone OR menadione OR calcium OR chloride OR  
 magnesium OR phosphorus OR romag OR potassium OR kalium OR sodium OR chromium OR copper  
 OR fluoride OR iodine OR iron OR "Fe" OR "Fe+++" OR ferro OR ferrum OR manganese OR  
 molybdenum OR selenium OR zinc ) ) OR ( TITLE-ABS-KEY ( ( "complete blood" OR "red blood  
 cell" OR erythrocyte OR rbc OR iron OR reticulocyte ) W/1 ( count OR indices ) ) OR "CBC" OR  
 "hemogram" OR ( ( "coronary risk" OR lipid OR cholesterol OR prothrombin OR prothrombine OR  
 protrombin ) W/1 ( panel OR test ) ) OR thrombotest OR "Fe Tests" ) ) OR ( TITLE-ABS-KEY (   
 undernutrition\* OR malnutrition\* OR avitaminosis OR ( ( nutrition\* OR mineral\* OR metabolic OR  
 nutrient\* OR micronutrient\* OR micro-nutrient\* ) W/2 ( deficien\* OR diseases OR disorder\* ) ) ) ) OR (   
 TITLE-ABS-KEY ( beriberi OR pellagra OR scurvy OR rickets OR osteomalacia OR hypocalcem\* OR  
 hypo-calcem\* OR hypercalcem\* OR hyper-calcem\* OR hypocalcaem\* OR hypo-calcaem\* OR  
 hypercalcaem\* OR hyper-calcaem\* OR hypocalciur\* OR hypo-calciur\* OR hypercalciur\* OR hyper-  
 calciur\* OR hypomagnesium\* OR hypo-magnesium\* OR hypermagnesium\* OR hyper-magnesium\* OR  
 hypomagnesaem\* OR hypo-magnesaem\* OR hypermagnesaem\* OR hyper-magnesaem\* OR  
 hypoalbuminem\* OR hypo-albuminem\* OR hyperalbuminem\* OR hyper-albuminem\* OR  
 hypoalbuminaem\* OR hypo-albuminaem\* OR hyperalbuminaem\* OR hyper-albuminaem\* OR  
 hypokalem\* OR hypo-kalem\* OR hyperkalem\* OR hyper-kalem\* OR hypokalaem\* OR hypo-kalaem\*  
 OR hyperkalaem\* OR hyper-kalaem\* OR hypohomocysteinem\* OR hypo-homocysteinem\* OR  
 hyperhomocysteinem\* OR hyper-homocysteinem\* ) ) ) AND NOT ( ( PMID ( 0\* ) OR PMID ( 1\* ) OR  
 PMID ( 2\* ) OR PMID ( 3\* ) OR PMID ( 4\* ) OR PMID ( 5\* ) OR PMID ( 6\* ) OR PMID ( 7\* ) OR  
 PMID ( 8\* ) OR PMID ( 9\* ) ) ) ) AND NOT ( TITLE-ABS ( case W/1 ( report\* OR series ) ) ) ) AND  
 NOT ( TITLE-ABS ( infan\* OR newborn\* OR new-born\* OR perinat\* OR neonat\* OR baby OR baby\*  
 OR babies OR toddler\* OR minors OR minors\* OR boy OR boys OR boyfriend OR boyhood OR girl\*  
 OR kid OR kids OR child OR child\* OR children\* OR schoolchild\* OR schoolchild OR adolescen\* OR  
 juvenil\* OR youth\* OR teen\* OR under\*age\* OR pubescen\* OR pediatric\* OR paediatric\* OR  
 peadiatric\* OR prematur\* OR preterm\* OR school child OR "school child\*" OR school OR school\* ) ) ) or  
 ( ( ( ( ( ( TITLE-ABS-KEY ( ( peripheral W/2 ( nerve\* OR nervous ) W/2 ( disease\* OR disorder\* ) )  
 OR "peripheral neuropath\*" ) ) OR ( TITLE-ABS-KEY ( pns W/2 ( disease\* OR disorder\* ) ) ) ) AND ( (   
 TITLE-ABS-KEY ( antineoplastic OR chemotherap\* OR chemo-therap\* OR ( ( anticancer\* OR anti-  
 cancer\* OR anticarcino\* OR anti-carcino\* OR antitumor OR anti-tumor OR antitumour\* OR anti-  
 tumour\* OR carcinostatic ) W/2 ( therap\* OR agent OR agents OR treatment\* OR management\* ) ) OR  
 carcinochemo\* OR "tumor inhibitor" OR "tumour inhibitor" ) ) OR ( TITLE-ABS-KEY ( "paclitaxel" OR  
 "abi 007" OR "abi007" OR "abraxane" OR "albumin bound paclitaxel" OR "anzatax" OR "apealea" OR  
 "asotax" OR "biotax" OR "bms 181339" OR "bms181339" OR "bmy 45622" OR "bmy45622" OR  
 "bristaxol" OR "britaxol" OR "coroxane" OR "dts 301" OR "dts301" OR "endotag-1" OR "formoxol" OR  
 "genexol" OR "genexol pm" OR "hunxol" OR "ifaxol" OR "infinium" OR "intaxel" OR "mbt 0206" OR  
 "mbt0206" OR "medixel" OR "mitotax" OR "nab paclitaxel" OR "nanoparticle albumin bound paclitaxel"  
 OR "nsc 125973" OR "nsc 673089" OR "nsc125973" OR "nsc673089" OR "oas pac 100" OR  
 "oaspac100" OR "oncogel" OR "onxol" OR "pacitaxel" OR "paclitaxel nab" OR "pacxel" OR "padexol"  
 OR "parexel" OR "paxceed" OR "paxene" OR "paxus" OR "praxel" OR "taxocris" OR "taxol" OR  
 "taycovit" OR "yewtaxan" ) ) ) OR ( TITLE-ABS-KEY ( "docetaxel" OR "daxotel" OR "dexotel" OR



"docefrez" OR "docetaxel accord" OR "lit 976" OR "lit976" OR "n debenzoyl n tert butoxycarbonyl 10 deacetyl taxol" OR "n tert butoxycarbonyl 10 deacetyl n debenzoyl taxol" OR "nsc 628503" OR "nsc628503" OR "oncodocel" OR "rp 56976" OR "rp56976" OR "taxespira" OR "taxoter" OR "taxotere" OR "texot" ) ) OR ( TITLE-ABS-KEY ( "oxaliplatin" OR "axiplatin" OR "crisapla" OR "croloxat" OR "dacotin" OR "dacplat" OR "ebeoxal" OR "elatofen" OR "eloxatin" OR "eloxatine" OR "elplat" OR "geneplatin" OR "heloxatin" OR "lipoxal" OR "mbp 426" OR "mbp426" OR "medoxa" OR "oplat" OR "oxalatoplatinum" OR "oxalatplatin" OR "oxali" OR "oxalip" OR "oxaliplan" OR "oxaliplatina" OR "oxaliprol" OR "oxaliquid" OR "oxalisan" OR "oxalisin" OR "oxalizer" OR "oxaltic" OR "oxaltina" OR "oxaplaml" OR "oxaviatin" OR "platox" OR "plaxitin" OR "rectoxal" OR "riboxatin" OR "rp 54780" OR "rp54780" OR "sinoxal" OR "sr 96669" OR "sr96669" OR "transplastin" OR "velminox" OR "xaliplat" OR "xoplan" ) ) OR ( TITLE-ABS-KEY ( "cisplatin" OR "abioplatin" OR "biocisplatinum" OR "biocysplatinum" OR "blastolem" OR "briplatin" OR "cddp ti" OR "cis ddp" OR "cis diamine dichloroplatinum" OR "cis diaminechloroplatinum" OR "cis diaminedichloroplatinum" OR "cis diammine dichloroplatinum" OR "cis diamminedichloroplatinum" OR "cis dichloridiammineplatinum" OR "cis dichlorodiamine platinum" OR "cis dichlorodiamine platinum" OR "cis dichlorodiammineplatinum" OR "cis platinous diamino dichloride" OR "cis platinum" OR "cis platinum diamine dichloride" OR "cis platinum diaminedichloride" OR "cis platinum diamino dichloride" OR "cis platinum diaminochloride" OR "cis platinum diaminodichloride" OR "cis platinum diammine dichloride" OR "cis platinum diamminedichloride" OR "cisplatin liposomal" OR "cisplatin therapeutic implant" OR "cisplatin-ebewe" OR "cisplatine" OR "cisplatino" OR "cisplatinum" OR "cisplatyl" OR "citoplatino" OR "cytoplatin" OR "cytosplat" OR "diamine dichloroplatinum" OR "diaminodichloroplatinum" OR "diamminedichloroplatinum" OR "dichlorodiamine platinum" OR "dichlorodiammineplatinum" OR "docistin" OR "elvecis" OR "kemoplat" OR "lederplatin" OR "lipoplatin" OR "liposomal cisplatin" OR "mpi 5010" OR "mpi5010" OR "neoplatin" OR "niyaplat" OR "nk 801" OR "noveldexis" OR "nsc 119875" OR "platamine" OR "platamine rtu" OR "platiblastin" OR "platidiam" OR "platimine" OR "platinex" OR "platinil" OR "platinol" OR "platinol aq" OR "platinoxan" OR "platinum diamine dichloride" OR "platinum diaminedichloride" OR "platinum diaminodichloride" OR "platinum diamminedichloride" OR "platiran" OR "platistil" OR "platistin" OR "platosin" OR "randa" OR "romcis" OR "sicate" OR "spi 077" OR "tecnoplatin" ) ) OR ( TITLE-ABS-KEY ( "bortezomib" OR "ldp 341" OR "ldp341" OR "mg 341" OR "mg341" OR "mln 341" OR "mln341" OR "ps 341" OR "ps341" OR "velcade" OR "vincristine" OR "l 37231" OR "l37231" OR "vin cristine" OR "vincristin" OR "vincrisul" OR "vinblastine" OR "le 29060" OR "le29060" OR "leukoblastin" OR "rozevin" OR "vin blastine" OR "vinblastin" OR "vincaleucoblastin" OR "vincaleucoblastine" OR "vincaleukoblastine" OR "vincoblastin" OR "vincoblastine" OR "vincoleucoblastine" OR "vincoleukoblastin" OR "vinleucoblastine" ) ) OR ( TITLE-ABS-KEY ( "thalidomide" OR "beta thalidomide" OR "contergan" OR "distaval" OR "isomin" OR "k 17" OR "kedavon" OR "kevadon" OR "neurosedine" OR "neurosedine" OR "nsc 66847" OR "sedalis" OR "shin naito" OR "softenon" OR "synovir" OR "talimol" OR "talizer" OR "telagan" OR "telargan" OR "thado" OR "thalidomid" OR "thalidomide celgene" OR "thalimodide" OR "thalix" OR "thalomid" ) ) ) OR ( TITLE-ABS-KEY ( ( chemo\* OR antineoplas\* OR anti-neoplas\* OR anticancer\* OR anti-cancer\* OR anticarcino\* OR anti-carcino\* OR antitumor OR anti-tumor OR antitumour OR anti-tumour OR carcinochemo\* OR carcinostatic OR "tumor inhibitor" OR "tumour inhibitor" ) W/3 ( neuropath\* OR neuralgia OR neurotox\* OR mononeuropath\* OR mono-neuropath\* OR polyneuropath\* OR poly-neuropath\* ) ) ) AND ( ( TITLE-ABS-KEY ( ( laboratory W/2 ( marker OR markers OR values OR test\* OR technique\* OR service OR services OR diagnos\* OR examin\* OR evaluat\* ) ) OR (

"lab test" OR "lab tests" OR "lab result" OR "lab results" OR "lab value" OR "lab values" OR deficient\* ) ) AND ( TITLE-ABS-KEY ( hemoglobin OR hemoglobins OR haemoglobin OR hemoglobine OR haemoglobine OR haemoglobins OR hemoglobulin OR hematocrit OR ferrohaemoglobin OR ferrohemo-globin OR erythrocytes OR eryhem OR albumin OR albumen OR prealbumin OR pre-albumin OR total-protein OR leptin OR globulin OR globulins OR polyglobulin OR poly-globulin OR choline OR bursine OR fagine OR vidine OR thiamin OR thiamine OR anemi\* OR anaemi\* OR aneurin OR riboflavin OR riboflavine OR "flavin mononucleotide" OR "flavin-adenine dinucleotide" OR niacin OR niacinamide OR enduramide OR nicobion OR nicotinamide OR nicotinsaureamid OR papulex OR "pantothenic acid" OR "calcium pantothenate" OR dexol OR "zinc pantothenate" OR "pyridoxal phosphate" OR "pyridoxal 5-phosphate" OR "pyridoxal-P" OR biotin OR folate OR "folic acid" OR folacin OR folvite OR folvit OR "pteroylglutamic acid" OR cobalamin OR cobalamins OR cyanocobalamin OR eritron OR "B1" OR "B2" OR "B3" OR "B5" OR "B6" OR "B7" OR "B9" OR "B12" OR ( b W/1 ( "1" OR "2" OR "3" OR "5" OR "6" OR "7" OR "9" OR "12" ) ) OR "methylmalonic acid" OR "methyl malonate" OR "methyl malonic acid" OR methylmalonate OR retinol OR carotene OR "Aqualon A" OR phytomenadione OR menaquinone OR menadione OR calcium OR chloride OR magnesium OR phosphorus OR romag OR potassium OR kalium OR sodium OR chromium OR copper OR fluoride OR iodine OR iron OR "Fe" OR "Fe+++" OR ferro OR ferrum OR manganese OR molybdenum OR selenium OR zinc ) ) ) OR ( TITLE-ABS-KEY ( ( "complete blood" OR "red blood cell" OR erythrocyte OR rbc OR iron OR reticulocyte ) W/1 ( count OR indices ) ) OR "CBC" OR "hemogram" OR ( "coronary risk" OR lipid OR cholesterol OR prothrombin OR prothrombine OR protrombin ) W/1 ( panel OR test ) ) OR thrombotest OR "Fe Tests" ) ) OR ( TITLE-ABS-KEY ( undernutrition\* OR malnutrition\* OR avitaminosis OR ( nutrition\* OR mineral\* OR metabolic OR nutrient\* OR micronutrient\* OR micro-nutrient\* ) W/2 ( deficient\* OR diseases OR disorder\* ) ) ) ) OR ( TITLE-ABS-KEY ( beriberi OR pellagra OR scurvy OR rickets OR osteomalacia OR hypocalcemia\* OR hypo-calcemia\* OR hypercalcemia\* OR hyper-calcemia\* OR hypocalcaemia\* OR hypo-calcaemia\* OR hypercalcaemia\* OR hyper-calcaemia\* OR hypocalciuria\* OR hypo-calciuria\* OR hypercalciuria\* OR hyper-calciuria\* OR hypomagnesemia\* OR hypo-magnesemia\* OR hypermagnesemia\* OR hyper-magnesemia\* OR hypomagnesaemia\* OR hypo-magnesaemia\* OR hypermagnesaemia\* OR hyper-magnesaemia\* OR hypoalbuminemia\* OR hypo-albuminemia\* OR hyperalbuminemia\* OR hyper-albuminemia\* OR hypoalbuminaemia\* OR hypo-albuminaemia\* OR hyperalbuminaemia\* OR hyper-albuminaemia\* OR hypokalemia\* OR hypo-kalemia\* OR hyperkalemia\* OR hyper-kalemia\* OR hypokalaemia\* OR hypo-kalaemia\* OR hyperkalaemia\* OR hyper-kalaemia\* OR hypohomocysteinemia\* OR hypo-homocysteinemia\* OR hyperhomocysteinemia\* OR hyper-homocysteinemia\* ) ) ) ) AND NOT ( ( PMID ( 0\* ) OR PMID ( 1\* ) OR PMID ( 2\* ) OR PMID ( 3\* ) OR PMID ( 4\* ) OR PMID ( 5\* ) OR PMID ( 6\* ) OR PMID ( 7\* ) OR PMID ( 8\* ) OR PMID ( 9\* ) ) ) ) AND NOT ( TITLE-ABS ( case W/1 ( report\* OR series ) ) ) ) AND ( TITLE-ABS ( adult or adults or aged or elderly ) ) )

*Update:* [Scopus](#) Date range: 1823 to December 08, 2021 – searched December 08, 2021.

( ( ( ( ( ( ( ( TITLE-ABS-KEY ( ( peripheral W/2 ( nerve\* OR nervous ) W/2 ( disease\* OR disorder\* ) ) OR "peripheral neuropath\*" ) ) OR ( TITLE-ABS-KEY ( pns W/2 ( disease\* OR disorder\* ) ) ) ) ) ) ) ) AND ( ( TITLE-ABS-KEY ( antineoplastic OR chemotherap\* OR chemo-therap\* OR ( anticancer\* OR anti-cancer\* OR anticarcino\* OR anti-carcino\* OR antitumor OR anti-

tumor OR antitumour\* OR anti-tumour\* OR carcinostatic ) W/2 ( therap\* OR agent OR agents OR treatment\* OR management\* ) ) OR carciinochemo\* OR "tumor inhibitor" OR "tumour inhibitor" ) ) OR ( TITLE-ABS-KEY ( "paclitaxel" OR "abi 007" OR "abi007" OR "abraxane" OR "albumin bound paclitaxel" OR "anzatax" OR "apealea" OR "asotax" OR "biotax" OR "bms 181339" OR "bms181339" OR "bmy 45622" OR "bmy45622" OR "bristaxol" OR "britaxol" OR "coroxane" OR "dts 301" OR "dts301" OR "endotag-1" OR "formoxol" OR "genexol" OR "genexol pm" OR "hunxol" OR "ifaxol" OR "infinnium" OR "intaxel" OR "mbt 0206" OR "mbt0206" OR "medixel" OR "mitotax" OR "nab paclitaxel" OR "nanoparticle albumin bound paclitaxel" OR "nsc 125973" OR "nsc 673089" OR "nsc125973" OR "nsc673089" OR "oas pac 100" OR "oaspac100" OR "oncogel" OR "onxol" OR "pacitaxel" OR "paclitaxel nab" OR "pacxel" OR "padexol" OR "parexel" OR "paxceed" OR "paxene" OR "paxus" OR "praxel" OR "taxocris" OR "taxol" OR "taycovit" OR "yewtaxan" ) ) OR ( TITLE-ABS-KEY ( "docetaxel" OR "daxotel" OR "dexotel" OR "docefrez" OR "docetaxel accord" OR "lit 976" OR "lit976" OR "n debenzoyl n tert butoxycarbonyl 10 deacetylaxol" OR "n tert butoxycarbonyl 10 deacetyl n debenzoyltaxol" OR "nsc 628503" OR "nsc628503" OR "oncodocel" OR "rp 56976" OR "rp56976" OR "taxespira" OR "taxoter" OR "taxotere" OR "texot" ) ) OR ( TITLE-ABS-KEY ( "oxaliplatin" OR "axiplatin" OR "crisapla" OR "croloxat" OR "dacotin" OR "dacplat" OR "ebeoxal" OR "elatofen" OR "eloxatin" OR "eloxatine" OR "elplat" OR "geneplatin" OR "heloxatin" OR "lipoxal" OR "mbp 426" OR "mbp426" OR "medoxa" OR "oplat" OR "oxalatoplatinum" OR "oxalatplatin" OR "oxali" OR "oxalip" OR "oxaliplan" OR "oxaliplatina" OR "oxaliprol" OR "oxaliquid" OR "oxalisan" OR "oxalisin" OR "oxalizer" OR "oxaltic" OR "oxaltina" OR "oxaplamyl" OR "oxaviatin" OR "platox" OR "plaxitin" OR "rectoxal" OR "riboxatin" OR "rp 54780" OR "rp54780" OR "sinoxal" OR "sr 96669" OR "sr96669" OR "transplastin" OR "velminox" OR "xaliplat" OR "xoplan" ) ) OR ( TITLE-ABS-KEY ( "cisplatin" OR "abiplatin" OR "biocisplatinum" OR "biocysplatinum" OR "blastolem" OR "briplatin" OR "cddp ti" OR "cis ddp" OR "cis diamine dichloroplatinum" OR "cis diaminechloroplatinum" OR "cis diaminedichloroplatinum" OR "cis diammine dichloroplatinum" OR "cis diamminedichloroplatinum" OR "cis dichlorodiammineplatinum" OR "cis dichlorodiamine platinum" OR "cis dichlorodiammineplatinum" OR "cis platinous diamino dichloride" OR "cis platinum" OR "cis platinum diamine dichloride" OR "cis platinum diaminedichloride" OR "cis platinum diamino dichloride" OR "cis platinum diaminochloride" OR "cis platinum diaminodichloride" OR "cis platinum diammine dichloride" OR "cis platinum diamminedichloride" OR "cisplatin liposomal" OR "cisplatin therapeutic implant" OR "cisplatin-ebewe" OR "cisplatine" OR "cisplatino" OR "cisplatinum" OR "cisplatyl" OR "citoplatino" OR "cytoplatin" OR "cytosplat" OR "diamine dichloroplatinum" OR "diaminodichloroplatinum" OR "diamminedichloroplatinum" OR "dichlorodiamine platinum" OR "dichlorodiammineplatinum" OR "docistin" OR "elvecis" OR "kemoplat" OR "lederplatin" OR "lipoplatin" OR "liposomal cisplatin" OR "mpi 5010" OR "mpi5010" OR "neoplatin" OR "niyaplat" OR "nk 801" OR "noveldexis" OR "nsc 119875" OR "platamine" OR "platamine rtu" OR "platiblastin" OR "platidiam" OR "platimine" OR "platinex" OR "platinil" OR "platinol" OR "platinol aq" OR "platinoxan" OR "platinum diamine dichloride" OR "platinum diaminedichloride" OR "platinum diaminodichloride" OR "platinum diamminedichloride" OR "platiran" OR "platistil" OR "platistin" OR "platosin" OR "randa" OR "romcis" OR "sicatem" OR "spi 077" OR "tecnoplatin" ) ) OR ( TITLE-ABS-KEY ( "bortezomib" OR "ldp 341" OR "ldp341" OR "mg 341" OR "mg341" OR "mln 341" OR "mln341" OR "ps

341" OR "ps341" OR "velcade" OR "vincristine" OR "l 37231" OR "l37231" OR "vin cristine"  
 OR "vincristin" OR "vincrisul" OR "vinblastine" OR "le 29060" OR "le29060" OR "leukoblastin"  
 OR "rozevin" OR "vin blastine" OR "vinblastin" OR "vincaleucoblastin" OR "vincaleucoblastine"  
 OR "vincaleukoblastine" OR "vincoblastin" OR "vincoblastine" OR "vincoleucoblastine" OR  
 "vincoleukoblastin" OR "vinleucoblastine" ) ) OR ( TITLE-ABS-KEY ( "thalidomide" OR "beta  
 thalidomide" OR "contergan" OR "distaval" OR "isomin" OR "k 17" OR "kedavon" OR  
 "kevadon" OR "neurosedin" OR "neurosedyne" OR "nsc 66847" OR "sedalis" OR "shin naito" OR  
 "softenon" OR "synovir" OR "talimol" OR "talizer" OR "telagan" OR "telargan" OR "thado" OR  
 "thalidomid" OR "thalidomide celgene" OR "thalimodide" OR "thalix" OR "thalomid" ) ) ) ) OR ( ( ( TITLE-ABS-KEY ( ( chemo\* OR antineoplas\* OR anti-neoplas\* OR anticancer\* OR anti-cancer\*  
 OR anticarcino\* OR anti-carcino\* OR antitumor OR anti-tumor OR antitumour OR anti-tumour  
 OR carcinochemo\* OR carcinostatic OR "tumor inhibitor" OR "tumour inhibitor" ) W/3 ( ( ( neuropath\* OR neuralgia OR neurotox\* OR mononeuropath\* OR mono-neuropath\* OR  
 polyneuropath\* OR poly-neuropath\* ) ) ) ) AND ( ( ( TITLE-ABS-KEY ( ( laboratory W/2 ( marker  
 OR markers OR values OR test\* OR technique\* OR service OR services OR diagnos\* OR  
 examin\* OR evaluat\* ) ) OR ( "lab test" OR "lab tests" OR "lab result" OR "lab results" OR "lab  
 value" OR "lab values" OR deficien\* ) ) ) AND ( TITLE-ABS-KEY ( hemoglobin OR hemoglobins  
 OR haemoglobin OR hemoglobine OR haemoglobine OR haemoglobins OR hemoglobulin OR  
 hematocrit OR ferrohaemoglobin OR ferrohemoglobin OR erythrocytes OR eryhem OR albumin  
 OR albumen OR prealbumin OR pre-albumin OR total-protein OR leptin OR globulin OR  
 globulins OR polyglobulin OR poly-globulin OR choline OR bursine OR fagine OR vidine OR  
 thiamin OR thiamine OR anemi\* OR anaemi\* OR aneurin OR riboflavin OR riboflavine OR  
 "flavin mononucleotide" OR "flavin-adenine dinucleotide" OR niacin OR niacinamide OR  
 enduramide OR nicobion OR nicotinamide OR nicotinsaureamid OR papulex OR "pantothenic  
 acid" OR "calcium pantothenate" OR dexol OR "zinc pantothenate" OR "pyridoxal phosphate" OR  
 "pyridoxal 5-phosphate" OR "pyridoxal-P" OR biotin OR folate OR "folic acid" OR folacin OR  
 folvite OR folvit OR "pteroylglutamic acid" OR cobalamin OR cobalamins OR cyanocobalamin  
 OR eritron OR "B1" OR "B2" OR "B3" OR "B5" OR "B6" OR "B7" OR "B9" OR "B12" OR  
 ( b W/1 ( "1" OR "2" OR "3" OR "5" OR "6" OR "7" OR "9" OR "12" ) ) OR "methylmalonic  
 acid" OR "methyl malonate" OR "methyl malonic acid" OR methylmalonate OR retinol OR  
 carotene OR "Aquasol A" OR phytomenadione OR menaquinone OR menadione OR calcium OR  
 chloride OR magnesium OR phosphorus OR romag OR potassium OR kalium OR sodium OR  
 chromium OR copper OR fluoride OR iodine OR iron OR "Fe" OR "Fe+++" OR ferro OR  
 ferrum OR manganese OR molybdenum OR selenium OR zinc ) ) ) OR ( TITLE-ABS-KEY ( ( ( ( "complete blood" OR "red blood cell" OR erythrocyte OR rbc OR iron OR reticulocyte ) W/1 ( ( count OR indices ) ) OR "CBC" OR "hemogram" OR ( ( "coronary risk" OR lipid OR cholesterol  
 OR prothrombin OR prothrombine OR protrombin ) W/1 ( panel OR test ) ) OR thrombotest OR  
 "Fe Tests" ) ) ) OR ( TITLE-ABS-KEY ( ( undernutrition\* OR malnutrition\* OR avitaminosis OR ( ( nutrition\* OR mineral\* OR metabolic OR nutrient\* OR micronutrient\* OR micro-nutrient\* ) W/2 ( deficien\* OR diseases OR disorder\* ) ) ) ) OR ( TITLE-ABS-KEY ( ( beriberi OR pellagra OR  
 scurvy OR rickets OR osteomalacia OR hypocalcem\* OR hypo-calcem\* OR hypercalcem\* OR  
 hyper-calcem\* OR hypocalcaem\* OR hypo-calcaem\* OR hypercalcaem\* OR hyper-calcaem\* OR  
 hypocalciur\* OR hypo-calciur\* OR hypercalciur\* OR hyper-calciur\* OR hypomagnesium\* OR  
 hypo-magnesium\* OR hypermagnesium\* OR hyper-magnesium\* OR hypomagnesaem\* OR hypo-

magnesaem\* OR hypermagnesaem\* OR hyper-magnesaem\* OR hypoalbuminem\* OR hypo-  
 albuminem\* OR hyperalbuminem\* OR hyper-albuminem\* OR hypoalbuminaem\* OR hypo-  
 albuminaem\* OR hyperalbuminaem\* OR hyper-albuminaem\* OR hypokalem\* OR hypo-kalem\*  
 OR hyperkalem\* OR hyper-kalem\* OR hypokalaem\* OR hypo-kalaem\* OR hyperkalaem\* OR  
 hyper-kalaem\* OR hypohomocysteinem\* OR hypo-homocysteinem\* OR hyperhomocysteinem\* OR  
 hyper-homocysteinem\* )))) AND NOT ( ( PMID ( 0\* ) OR PMID ( 1\* ) OR PMID ( 2\* ) OR  
 PMID ( 3\* ) OR PMID ( 4\* ) OR PMID ( 5\* ) OR PMID ( 6\* ) OR PMID ( 7\* ) OR PMID ( 8\* )  
 OR PMID ( 9\* ) ) ) ) AND NOT ( TITLE-ABS ( case W/1 ( report\* OR series ) ) ) ) AND NOT (   
 TITLE-ABS ( infan\* OR newborn\* OR new-born\* OR perinat\* OR neonat\* OR baby OR baby\*  
 OR babies OR toddler\* OR minors OR minors\* OR boy OR boys OR boyfriend OR boyhood  
 OR girl\* OR kid OR kids OR child OR child\* OR children\* OR schoolchild\* OR schoolchild  
 OR adolescen\* OR juvenil\* OR youth\* OR teen\* OR under\*age\* OR pubescen\* OR pediatric\*  
 OR paediatric\* OR peadiatric\* OR prematur\* OR preterm\*or AND school AND child OR "school  
 child\*" OR school OR school\* ) ) ) OR ( ( ( ( ( ( ( ( TITLE-ABS-KEY ( ( peripheral W/2 ( nerve\*  
 OR nervous ) W/2 ( disease\* OR disorder\* ) ) OR "peripheral neuropath\*" ) ) OR ( TITLE-ABS-  
 KEY ( pns W/2 ( disease\* OR disorder\* ) ) ) ) AND ( ( TITLE-ABS-KEY ( antineoplastic OR  
 chemotherap\* OR chemo-therap\* OR ( ( anticancer\* OR anti-cancer\* OR anticarcino\* OR anti-  
 carcino\* OR antitumor OR anti-tumor OR antitumour\* OR anti-tumour\* OR carcinostatic ) W/2 (   
 therap\* OR agent OR agents OR treatment\* OR management\* ) ) OR carcinochemo\* OR "tumor  
 inhibitor" OR "tumour inhibitor" ) ) OR ( TITLE-ABS-KEY ( "paclitaxel" OR "abi 007" OR  
 "abi007" OR "abraxane" OR "albumin bound paclitaxel" OR "anzatax" OR "apealea" OR "asotax"  
 OR "biotax" OR "bms 181339" OR "bms181339" OR "bmy 45622" OR "bmy45622" OR  
 "bristaxol" OR "britaxol" OR "coroxane" OR "dts 301" OR "dts301" OR "endotag-1" OR  
 "formoxol" OR "genexol" OR "genexol pm" OR "hunxol" OR "ifaxol" OR "infinnium" OR  
 "intaxel" OR "mbt 0206" OR "mbt0206" OR "medixel" OR "mitotax" OR "nab paclitaxel" OR  
 "nanoparticle albumin bound paclitaxel" OR "nsc 125973" OR "nsc 673089" OR "nsc125973" OR  
 "nsc673089" OR "oas pac 100" OR "oaspac100" OR "oncogel" OR "onxol" OR "pacitaxel" OR  
 "paclitaxel nab" OR "pacxel" OR "padexol" OR "parexel" OR "paxceed" OR "paxene" OR  
 "paxus" OR "praxel" OR "taxocris" OR "taxol" OR "taycovit" OR "yewtaxan" ) ) ) OR ( TITLE-  
 ABS-KEY ( "docetaxel" OR "daxotel" OR "dexotel" OR "docefrez" OR "docetaxel accord" OR "lit  
 976" OR "lit976" OR "n debenzoyl n tert butoxycarbonyl 10 deacetyl taxol" OR "n tert  
 butoxycarbonyl 10 deacetyl n debenzoyl taxol" OR "nsc 628503" OR "nsc628503" OR "oncodocel"  
 OR "rp 56976" OR "rp56976" OR "taxespira" OR "taxoter" OR "taxotere" OR "texot" ) ) ) OR (   
 TITLE-ABS-KEY ( "oxaliplatin" OR "axioplantin" OR "crisapla" OR "croloxat" OR "dacotin" OR  
 "dacplat" OR "ebeoxal" OR "elatofen" OR "eloxatin" OR "eloxatine" OR "elplat" OR "geneplatin"  
 OR "heloxatin" OR "lipoxal" OR "mbp 426" OR "mbp426" OR "medoxa" OR "oplat" OR  
 "oxalatoplatinum" OR "oxalatplatin" OR "oxali" OR "oxalip" OR "oxaliplan" OR "oxaliplatina"  
 OR "oxaliprol" OR "oxaliquid" OR "oxalisan" OR "oxalisin" OR "oxalizer" OR "oxaltic" OR  
 "oxaltina" OR "oxaplaml" OR "oxaviatin" OR "platox" OR "plaxitin" OR "rectoxal" OR  
 "riboxatin" OR "rp 54780" OR "rp54780" OR "sinoxal" OR "sr 96669" OR "sr96669" OR  
 "transplastin" OR "velminox" OR "xaliplat" OR "xoplan" ) ) ) OR ( TITLE-ABS-KEY ( "cisplatin"  
 OR "abiplatin" OR "biocisplatinum" OR "biocysplatinum" OR "blastolem" OR "briplatin" OR  
 "cddp ti" OR "cis ddp" OR "cis diamine dichloroplatinum" OR "cis diaminechloroplatinum" OR "cis  
 diaminedichloroplatinum" OR "cis diammine dichloroplatinum" OR "cis diamminedichloroplatinum"



OR "cis dichloridiammineplatinum" OR "cis dichlorodiamine platinum" OR "cis dichlorodiamine platinum" OR "cis dichlorodiammineplatinum" OR "cis platinous diamino dichloride" OR "cis platinum" OR "cis platinum diamine dichloride" OR "cis platinum diaminedichloride" OR "cis platinum diamino dichloride" OR "cis platinum diaminochloride" OR "cis platinum diaminodichloride" OR "cis platinum diammine dichloride" OR "cis platinum diamminedichloride" OR "cisplatin liposomal" OR "cisplatin therapeutic implant" OR "cisplatin-ebewe" OR "cisplatine" OR "cisplatino" OR "cisplatinum" OR "cisplatyl" OR "citoplatino" OR "cytoplatin" OR "cytosplat" OR "diamine dichloroplatinum" OR "diaminodichloroplatinum" OR "diamminedichloroplatinum" OR "dichlorodiamine platinum" OR "dichlorodiammineplatinum" OR "docistin" OR "elvecis" OR "kemoplat" OR "lederplatin" OR "lipoplatin" OR "liposomal cisplatin" OR "mpi 5010" OR "mpi5010" OR "neoplatin" OR "niyaplat" OR "nk 801" OR "noveldexis" OR "nsc 119875" OR "platamine" OR "platamine rtu" OR "platiblastin" OR "platidiam" OR "platimine" OR "platinex" OR "platinil" OR "platinol" OR "platinol aq" OR "platinoxan" OR "platinum diamine dichloride" OR "platinum diaminedichloride" OR "platinum diaminodichloride" OR "platinum diamminedichloride" OR "platiran" OR "platistil" OR "platistin" OR "platosin" OR "randa" OR "romcis" OR "sicatem" OR "spi 077" OR "tecnoplatin" ) ) OR ( TITLE-ABS-KEY ( "bortezomib" OR "ldp 341" OR "ldp341" OR "mg 341" OR "mg341" OR "mln 341" OR "mln341" OR "ps 341" OR "ps341" OR "velcade" OR "vincristine" OR "l 37231" OR "l37231" OR "vin cristine" OR "vincristin" OR "vincrisul" OR "vinblastine" OR "le 29060" OR "le29060" OR "leukoblastin" OR "rozevin" OR "vin blastine" OR "vinblastin" OR "vincaleucoblastin" OR "vincaleucoblastine" OR "vincaleukoblastine" OR "vincoblastin" OR "vincoblastine" OR "vincoleucoblastine" OR "vincoleukoblastin" OR "vinleucoblastine" ) ) OR ( TITLE-ABS-KEY ( "thalidomide" OR "beta thalidomide" OR "contergan" OR "distaval" OR "isomin" OR "k 17" OR "kedavon" OR "kevadon" OR "neurosedin" OR "neurosedyne" OR "nsc 66847" OR "sedalis" OR "shin naito" OR "softenon" OR "synovir" OR "talimol" OR "talizer" OR "telagan" OR "telargan" OR "thado" OR "thalidomid" OR "thalidomide celgene" OR "thalimodide" OR "thalix" OR "thalomid" ) ) ) ) OR ( TITLE-ABS-KEY ( ( chemo\* OR antineoplas\* OR anti-neoplas\* OR anticancer\* OR anti-cancer\* OR anticarcino\* OR anti-carcino\* OR antitumor OR anti-tumor OR antitumour OR anti-tumour OR carcinochemo\* OR carcinostatic OR "tumor inhibitor" OR "tumour inhibitor" ) W/3 ( neuropath\* OR neuralgia OR neurotox\* OR mononeuropath\* OR mono-neuropath\* OR polyneuropath\* OR poly-neuropath\* ) ) ) ) AND ( ( ( TITLE-ABS-KEY ( ( laboratory W/2 ( marker OR markers OR values OR test\* OR technique\* OR service OR services OR diagnos\* OR examin\* OR evaluat\* ) ) OR ( "lab test" OR "lab tests" OR "lab result" OR "lab results" OR "lab value" OR "lab values" OR deficient\* ) ) ) AND ( TITLE-ABS-KEY ( hemoglobin OR hemoglobins OR haemoglobin OR hemoglobine OR haemoglobine OR haemoglobins OR hemoglobulin OR hematocrit OR ferrohaemoglobin OR ferrohemoglobin OR erythrocytes OR eryhem OR albumin OR albumen OR prealbumin OR pre-albumin OR total-protein OR leptin OR globulin OR globulins OR polyglobulin OR poly-globulin OR choline OR bursine OR fagine OR vidine OR thiamin OR thiamine OR anemi\* OR anaemi\* OR aneurin OR riboflavin OR riboflavine OR "flavin mononucleotide" OR "flavin-adenine dinucleotide" OR niacin OR niacinamide OR enduramide OR nicobion OR nicotinamide OR nicotinsaureamid OR papulex OR "pantothenic acid" OR "calcium pantothenate" OR dexol OR "zinc pantothenate" OR "pyridoxal phosphate" OR "pyridoxal 5-phosphate" OR "pyridoxal-P" OR biotin OR folate OR "folic acid" OR folacin OR folvite OR folvit OR "pteroylglutamic acid" OR cobalamin OR cobalamins OR cyanocobalamin

OR eritron OR "B1" OR "B2" OR "B3" OR "B5" OR "B6" OR "B7" OR "B9" OR "B12" OR (b W/1 ("1" OR "2" OR "3" OR "5" OR "6" OR "7" OR "9" OR "12")) OR "methylmalonic acid" OR "methyl malonate" OR "methyl malonic acid" OR methylmalonate OR retinol OR carotene OR "Aquasol A" OR phytomenadione OR menaquinone OR menadione OR calcium OR chloride OR magnesium OR phosphorus OR romag OR potassium OR kalium OR sodium OR chromium OR copper OR fluoride OR iodine OR iron OR "Fe" OR "Fe+++" OR ferro OR ferrum OR manganese OR molybdenum OR selenium OR zinc))) OR (TITLE-ABS-KEY((( "complete blood" OR "red blood cell" OR erythrocyte OR rbc OR iron OR reticulocyte) W/1 (count OR indices)) OR "CBC" OR "hemogram" OR (( "coronary risk" OR lipid OR cholesterol OR prothrombin OR prothrombine OR protrombin) W/1 (panel OR test)) OR thrombotest OR "Fe Tests")) OR (TITLE-ABS-KEY( (undernutrition\* OR malnutrition\* OR avitaminosis OR ( (nutrition\* OR mineral\* OR metabolic OR nutrient\* OR micronutrient\* OR micro-nutrient\*) W/2 (deficien\* OR diseases OR disorder\*)))) OR (TITLE-ABS-KEY( (beriberi OR pellagra OR scurvy OR rickets OR osteomalacia OR hypocalcem\* OR hypo-calcem\* OR hypercalcem\* OR hyper-calcem\* OR hypocalcaem\* OR hypo-calcaem\* OR hypercalcaem\* OR hyper-calcaem\* OR hypocalciur\* OR hypo-calciur\* OR hypercalciur\* OR hyper-calciur\* OR hypomagnesium\* OR hypo-magnesium\* OR hypermagnesium\* OR hyper-magnesium\* OR hypomagnesaem\* OR hypo-magnesaem\* OR hypermagnesaem\* OR hyper-magnesaem\* OR hypoalbuminem\* OR hypo-albuminem\* OR hyperalbuminem\* OR hyper-albuminem\* OR hypoalbuminaem\* OR hypo-albuminaem\* OR hyperalbuminaem\* OR hyper-albuminaem\* OR hypokalem\* OR hypo-kalem\* OR hyperkalem\* OR hyper-kalem\* OR hypokalaem\* OR hypo-kalaem\* OR hyperkalaem\* OR hyper-kalaem\* OR hypohomocysteinem\* OR hypo-homocysteinem\* OR hyperhomocysteinem\* OR hyper-homocysteinem\*)) AND NOT ((PMID(0\*) OR PMID(1\*) OR PMID(2\*) OR PMID(3\*) OR PMID(4\*) OR PMID(5\*) OR PMID(6\*) OR PMID(7\*) OR PMID(8\*) OR PMID(9\*)) AND NOT (TITLE-ABS(case W/1 (report\* OR series)))) AND (TITLE-ABS(adult OR adults OR aged OR elderly))) AND (LIMIT-TO(PUBYEAR, 2021) OR LIMIT-TO(PUBYEAR, 2020))

## 6. Web of Science Core Collection: Citation Indexes

- **Science Citation Index Expanded (SCI-EXPANDED)** --1975-present

Data last updated: 2020-06-03 – searched June 4, 2020.

|      |                                                                                                                   |
|------|-------------------------------------------------------------------------------------------------------------------|
| # 27 | #26 OR #24<br>Indexes=SCI-EXPANDED Timespan=All years                                                             |
| # 26 | #22 AND #25<br>Indexes=SCI-EXPANDED Timespan=All years                                                            |
| # 25 | TS=(adult or adults or aged or elderly)<br>Indexes=SCI-EXPANDED Timespan=All years                                |
| # 24 | #22 NOT #23<br>Indexes=SCI-EXPANDED Timespan=All years                                                            |
| # 23 | TS=(infan* OR newborn* OR new-born* OR perinat* OR neonat* OR baby OR baby* OR babies OR toddler* OR minors OR mi |

|      |                                                                                                                                                                                                                                                                                                                                                                                                                                                                                                                                                                                                                                                                                                                                                                                                                                                                                                                                                                                                                                                                                                                                                                                                                                                                                                                                                                                                                                                                                                                                                 |
|------|-------------------------------------------------------------------------------------------------------------------------------------------------------------------------------------------------------------------------------------------------------------------------------------------------------------------------------------------------------------------------------------------------------------------------------------------------------------------------------------------------------------------------------------------------------------------------------------------------------------------------------------------------------------------------------------------------------------------------------------------------------------------------------------------------------------------------------------------------------------------------------------------------------------------------------------------------------------------------------------------------------------------------------------------------------------------------------------------------------------------------------------------------------------------------------------------------------------------------------------------------------------------------------------------------------------------------------------------------------------------------------------------------------------------------------------------------------------------------------------------------------------------------------------------------|
|      | nors* OR boy OR boys OR boyfriend OR boyhood OR girl* OR kid OR kids OR child OR child* OR children* OR schoolchild* OR schoolchild OR adolescen* OR juvenil* OR youth* OR teen* OR under*age* OR pubescen* OR pediatric* OR paediatric* OR peadiatric* OR prematur* OR preterm*OR school child OR "school child*" OR school OR school*)<br>Indexes=SCI-EXPANDED Timespan=All years                                                                                                                                                                                                                                                                                                                                                                                                                                                                                                                                                                                                                                                                                                                                                                                                                                                                                                                                                                                                                                                                                                                                                             |
| # 22 | #21 AND #14<br>Indexes=SCI-EXPANDED Timespan=All years                                                                                                                                                                                                                                                                                                                                                                                                                                                                                                                                                                                                                                                                                                                                                                                                                                                                                                                                                                                                                                                                                                                                                                                                                                                                                                                                                                                                                                                                                          |
| # 21 | #20 OR #19 OR #18 OR #17<br>Indexes=SCI-EXPANDED Timespan=All years                                                                                                                                                                                                                                                                                                                                                                                                                                                                                                                                                                                                                                                                                                                                                                                                                                                                                                                                                                                                                                                                                                                                                                                                                                                                                                                                                                                                                                                                             |
| # 20 | TS=(beriberi or pellagra or scurvy or rickets or osteomalacia or hypocalcem* or hypocalcem* or hypercalcem* or hyper-calcem* or hypocalcaem* or hypocalcaem* or hypercalcaem* or hyper-calcaem* or hypocalciur* or hypocalciur* or hypercalciur* or hyper-calciur* or hypomagnesium* or hypomagnesium* or hypermagnesium* or hyper-magnesium* or hypomagnesaem* or hypomagnesaem* or hypermagnesaem* or hyper-magnesaem* or hypoalbuminem* or hypoalbuminem* or hyperalbuminem* or hyper-albuminem* or hypoalbuminaem* or hypoalbuminaem* or hyperalbuminaem* or hyper-albuminaem* or hypokalem* or hypokalem* or hyperkalem* or hyper-kalem* or hypokalaem* or hypokalaem* or hyperkalaem* or hyper-kalaem* or hypohomocysteinem* or hypohomocysteinem* or hyperhomocysteinem* or hyper-homocysteinem*)<br>Indexes=SCI-EXPANDED Timespan=All years                                                                                                                                                                                                                                                                                                                                                                                                                                                                                                                                                                                                                                                                                             |
| # 19 | TS=(undernutrition* or malnutrition* or avitaminosis or ((nutrition* or mineral* or metabolic or nutrient* or micronutrient* or micro-nutrient*) NEAR/2 (deficien* or diseases or disorder* ))<br>Indexes=SCI-EXPANDED Timespan=All years                                                                                                                                                                                                                                                                                                                                                                                                                                                                                                                                                                                                                                                                                                                                                                                                                                                                                                                                                                                                                                                                                                                                                                                                                                                                                                       |
| # 18 | TS=((("complete blood" or "red blood cell" or erythrocyte or RBC or iron or reticulocyte) NEAR/1 (count or indices) ) or "CBC" or "hemogram" or ((("coronary risk" or lipid or cholesterol or prothrombin or prothrombine or protrombin) NEAR/1 (panel or test) ) or Thrombotest or "Fe Tests")<br>Indexes=SCI-EXPANDED Timespan=All years                                                                                                                                                                                                                                                                                                                                                                                                                                                                                                                                                                                                                                                                                                                                                                                                                                                                                                                                                                                                                                                                                                                                                                                                      |
| # 17 | #16 AND #15<br>Indexes=SCI-EXPANDED Timespan=All years                                                                                                                                                                                                                                                                                                                                                                                                                                                                                                                                                                                                                                                                                                                                                                                                                                                                                                                                                                                                                                                                                                                                                                                                                                                                                                                                                                                                                                                                                          |
| # 16 | TS=(hemoglobin or hemoglobins or haemoglobin or hemoglobine or haemoglobine or haemoglobins or hemoglobulin or hematocrit or ferrohaemoglobin or ferrohemoglobin or erythrocytes or erythem or albumin or albumen or prealbumin or pre-albumin or total-protein or leptin or globulin or globulins or polyglobulin or polyglobulin or choline or bursine or fagine or vidine or thiamin or thiamine or anemi* or anaemi* or aneurin or riboflavin or riboflavine or "flavin mononucleotide" or "flavin-adenine dinucleotide" or niacin or niacinamide or enduramide or nicobion or nicotinamide or nicotinsauareamid or papulex or "pantothenic acid" or "calcium pantothenate" or dexol or "zinc pantothenate" or "pyridoxal phosphate" or "pyridoxal 5-phosphate" or "pyridoxal-P" or biotin or folate or "folic acid" or folacin or folvite or folvit or "pteroylglutamic acid" or cobalamin or cobalamins or cyanocobalamin or eritron or "B1" or "B2" or "B3" or "B5" or "B6" or "B7" or "B9" or "B12" or (B NEAR/1 ("1" or "2" or "3" or "5" or "6" or "7" or "9" or "12") ) or "methylmalonic acid" or "methyl malonate" or "methyl malonic acid" or methylmalonate or retinol or carotene or "Aquasol A" or phytomenadione or menaquinone or menadione or calcium or chloride or magnesium or phosphorus or romag or potassium or kalium or sodium or chromium or copper or fluoride or iodine or iron or "Fe" or "Fe+++" or ferro or ferrum or manganese or molybdenum or selenium or zinc)<br>Indexes=SCI-EXPANDED Timespan=All years |
| # 15 | TS=((laboratory NEAR/2 (marker or markers or values or test* or technique* or service or services or diagnos* or examin* or evaluat*) ) or ("lab test" or "lab tests" or "lab result" or "lab results" or "lab value" or "lab values" or deficien*) )                                                                                                                                                                                                                                                                                                                                                                                                                                                                                                                                                                                                                                                                                                                                                                                                                                                                                                                                                                                                                                                                                                                                                                                                                                                                                           |



|      |                                                                                                                                                                                                                                                                                                                                                                                                                                                                                                                                                                                                                                                                                                                                                                                                                                                                                                                                                                                                                                                                                                                                                                                                                                                                                                                                                                                                                                                                                                                                                                                                                                                                                                                                                                                                           |
|------|-----------------------------------------------------------------------------------------------------------------------------------------------------------------------------------------------------------------------------------------------------------------------------------------------------------------------------------------------------------------------------------------------------------------------------------------------------------------------------------------------------------------------------------------------------------------------------------------------------------------------------------------------------------------------------------------------------------------------------------------------------------------------------------------------------------------------------------------------------------------------------------------------------------------------------------------------------------------------------------------------------------------------------------------------------------------------------------------------------------------------------------------------------------------------------------------------------------------------------------------------------------------------------------------------------------------------------------------------------------------------------------------------------------------------------------------------------------------------------------------------------------------------------------------------------------------------------------------------------------------------------------------------------------------------------------------------------------------------------------------------------------------------------------------------------------|
|      | Indexes=SCI-EXPANDED Timespan=All years                                                                                                                                                                                                                                                                                                                                                                                                                                                                                                                                                                                                                                                                                                                                                                                                                                                                                                                                                                                                                                                                                                                                                                                                                                                                                                                                                                                                                                                                                                                                                                                                                                                                                                                                                                   |
| # 14 | #13 OR #12<br>Indexes=SCI-EXPANDED Timespan=All years                                                                                                                                                                                                                                                                                                                                                                                                                                                                                                                                                                                                                                                                                                                                                                                                                                                                                                                                                                                                                                                                                                                                                                                                                                                                                                                                                                                                                                                                                                                                                                                                                                                                                                                                                     |
| # 13 | TS=((chemo* or antineoplas* or anti-neoplas* or anticancer* or anti-cancer* or anticarcino* or anti-carcino* or antitumor or anti-tumor or antitumour or anti-tumour or carcinochemo* or carcinostatic or "tumor inhibitor" or "tumour inhibitor") NEAR/3 (neuropath* or neuralgia or neurotox* or mononeuropath* or mono-neuropath* or polyneuropath* or polyneuropath*))<br>Indexes=SCI-EXPANDED Timespan=All years                                                                                                                                                                                                                                                                                                                                                                                                                                                                                                                                                                                                                                                                                                                                                                                                                                                                                                                                                                                                                                                                                                                                                                                                                                                                                                                                                                                     |
| # 12 | #11 AND #3<br>Indexes=SCI-EXPANDED Timespan=All years                                                                                                                                                                                                                                                                                                                                                                                                                                                                                                                                                                                                                                                                                                                                                                                                                                                                                                                                                                                                                                                                                                                                                                                                                                                                                                                                                                                                                                                                                                                                                                                                                                                                                                                                                     |
| # 11 | #10 OR #9 OR #8 OR #7 OR #6 OR #5 OR #4<br>Indexes=SCI-EXPANDED Timespan=All years                                                                                                                                                                                                                                                                                                                                                                                                                                                                                                                                                                                                                                                                                                                                                                                                                                                                                                                                                                                                                                                                                                                                                                                                                                                                                                                                                                                                                                                                                                                                                                                                                                                                                                                        |
| # 10 | TS=(antineoplastic or chemotherap* or chemo-therap* or ((anticancer* or anti-cancer* or anticarcino* or anti-carcino* or antitumor or anti-tumor or antitumour* or anti-tumour* or carcinostatic) NEAR/2 (therap* or agent or agents or treatment* or management*)) or carcinochemo* or "tumor inhibitor" or "tumour inhibitor")<br>Indexes=SCI-EXPANDED Timespan=All years                                                                                                                                                                                                                                                                                                                                                                                                                                                                                                                                                                                                                                                                                                                                                                                                                                                                                                                                                                                                                                                                                                                                                                                                                                                                                                                                                                                                                               |
| # 9  | TS=("thalidomide" or "beta thalidomide" or "contergan" or "distaval" or "isomin" or "k 17" or "kedavon" or "kevadon" or "neurosedin" or "neurosedyne" or "nsc 66847" or "sedalis" or "shin naito" or "softenon" or "synovir" or "talimol" or "talizer" or "telagan" or "telargan" or "thado" or "thalidomid" or "thalidomide celgene" or "thalimodide" or "thalix" or "thalomid")<br>Indexes=SCI-EXPANDED Timespan=All years                                                                                                                                                                                                                                                                                                                                                                                                                                                                                                                                                                                                                                                                                                                                                                                                                                                                                                                                                                                                                                                                                                                                                                                                                                                                                                                                                                              |
| # 8  | TS=("bortezomib" or "ldp 341" or "ldp341" or "mg 341" or "mg341" or "mln 341" or "mln341" or "ps 341" or "ps341" or "velcade" or "vincristine" or "l 37231" or "l37231" or "vin cristine" or "vincristin" or "vincrisul" or "vinblastine" or "le 29060" or "le29060" or "leukoblastin" or "rozevin" or "vin blastine" or "vinblastin" or "vincaleucoblastin" or "vincaleucoblastine" or "vincaleukoblastine" or "vincoblastin" or "vincoblastine" or "vincoleucoblastine" or "vincoleukoblastin" or "vinleucoblastine")<br>Indexes=SCI-EXPANDED Timespan=All years                                                                                                                                                                                                                                                                                                                                                                                                                                                                                                                                                                                                                                                                                                                                                                                                                                                                                                                                                                                                                                                                                                                                                                                                                                        |
| # 7  | TS=("cisplatin" or "abiplatin" or "biocisplatinum" or "biocysplatinum" or "blastolem" or "briplatin" or "cddp ti" or "cis ddp" or "cis diamine dichloroplatinum" or "cis diaminechloroplatinum" or "cis diaminedichloroplatinum" or "cis diammine dichloroplatinum" or "cis diamminedichloroplatinum" or "cis dichlorodiammineplatinum" or "cis dichloroadiamine platinum" or "cis dichlorodiamine platinum" or "cis dichlorodiammineplatinum" or "cis platinous diamino dichloride" or "cis platinum" or "cis platinum diamine dichloride" or "cis platinum diaminedichloride" or "cis platinum diamino dichloride" or "cis platinum diaminochloride" or "cis platinum diaminodichloride" or "cis platinum diammine dichloride" or "cis platinum diamminedichloride" or "cisplatin liposomal" or "cisplatin therapeutic implant" or "cisplatin-ebewe" or "cisplatine" or "cisplatino" or "cisplatinum" or "cisplatyl" or "citoplatino" or "cytoplatin" or "cytosplat" or "diamine dichloroplatinum" or "diaminodichloroplatinum" or "diamminedichloroplatinum" or "dichlorodiamine platinum" or "dichlorodiammineplatinum" or "docistin" or "elvecis" or "kemoplat" or "lederplatin" or "lipoplatin" or "liposomal cisplatin" or "mpi 5010" or "mpi5010" or "neoplatin" or "niyaplat" or "nk 801" or "noveldexis" or "nsc 119875" or "platamine" or "platamine rtu" or "platiblastin" or "platidiam" or "platimine" or "platinex" or "platinil" or "platinol" or "platinol aq" or "platinoxan" or "platinum diamine dichloride" or "platinum diaminedichloride" or "platinum diaminodichloride" or "platinum diamminedichloride" or "platiran" or "platistil" or "platistin" or "platosin" or "randa" or "romcis" or "sicatem" or "spi 077" or "tecnoplatin")<br>Indexes=SCI-EXPANDED Timespan=All years |
| # 6  | TS=("oxaliplatin"                                                                                                                                                                                                                                                                                                                                                                                                                                                                                                                                                                                                                                                                                                                                                                                                                                                                                                                                                                                                                                                                                                                                                                                                                                                                                                                                                                                                                                                                                                                                                                                                                                                                                                                                                                                         |

|     |                                                                                                                                                                                                                                                                                                                                                                                                                                                                                                                                                                                                                                                                                                                                                                                                                                                                      |
|-----|----------------------------------------------------------------------------------------------------------------------------------------------------------------------------------------------------------------------------------------------------------------------------------------------------------------------------------------------------------------------------------------------------------------------------------------------------------------------------------------------------------------------------------------------------------------------------------------------------------------------------------------------------------------------------------------------------------------------------------------------------------------------------------------------------------------------------------------------------------------------|
|     | <p>or "axiplatin" or "crisapla" or "croloxat" or "dacotin" or "dacplat" or "ebeoxal" or "elatofen" or "eloxatin" or "eloxatine" or "elplat" or "geneplatin" or "heloxatin" or "lipoxal" or "mbp 426" or "mbp426" or "medoxa" or "oplat" or "oxalatoplatinum" or "oxalatplatin" or "oxali" or "oxalip" or "oxaliplan" or "oxaliplatina" or "oxaliprol" or "oxaliquid" or "oxalisan" or "oxalisin" or "oxalizo" or "oxaltic" or "oxaltina" or "oxaplamyl" or "oxaviatin" or "platox" or "plaxitin" or "rectoxal"</p> <p>or "riboxatin" or "rp 54780" or "rp54780" or "sinoxal" or "sr 96669" or "sr96669" or "transplastin" or "velminox" or "xaliplat" or "xoplan")</p> <p>Indexes=SCI-EXPANDED Timespan=All years</p>                                                                                                                                                |
| # 5 | <p>TS=("docetaxel" or "daxotel" or "dexotel" or "docefrez" or "docetaxel accord" or "lit 976" or "lit976" or "n debenzoyl n tert butoxycarbonyl 10 deacetylaxol" or "n tert butoxycarbonyl 10 deacetyl n debenzoyl axol" or "nsc 628503" or "nsc628503" or "oncodocel" or "rp 56976" or "rp56976" or "taxespira" or "taxoter" or "taxotere" or "texot")</p> <p>Indexes=SCI-EXPANDED Timespan=All years</p>                                                                                                                                                                                                                                                                                                                                                                                                                                                           |
| # 4 | <p>TS=("paclitaxel" or "abi 007" or "abi007" or "abraxane" or "albumin bound paclitaxel" or "anzatax" or "apealea" or "asotax" or "biotax" or "bms 181339" or "bms181339" or "bmy 45622" or "bmy45622" or "bristaxol" or "britaxol" or "coroxane" or "dts 301" or "dts301" or "endotag-1" or "formoxol" or "genexol" or "genexol pm" or "hunxol" or "ifaxol" or "infinnium" or "intaxel" or "mbt 0206" or "mbt0206" or "medixel" or "mitotax" or "nab paclitaxel" or "nanoparticle albumin bound paclitaxel" or "nsc 125973" or "nsc 673089" or "nsc125973" or "nsc673089" or "oas pac 100" or "oaspac100" or "oncogel" or "onxol" or "pacitaxel" or "paclitaxel nab" or "pacxel" or "padexol" or "parexel" or "paxceed" or "paxene" or "paxus" or "praxel" or "taxocris" or "taxol" or "taycovit" or "yewtaxan")</p> <p>Indexes=SCI-EXPANDED Timespan=All years</p> |
| # 3 | <p>#2 OR #1</p> <p>Indexes=SCI-EXPANDED Timespan=All years</p>                                                                                                                                                                                                                                                                                                                                                                                                                                                                                                                                                                                                                                                                                                                                                                                                       |
| # 2 | <p>TS=(PNS NEAR/2 (disease* or disorder*))</p> <p>Indexes=SCI-EXPANDED Timespan=All years</p>                                                                                                                                                                                                                                                                                                                                                                                                                                                                                                                                                                                                                                                                                                                                                                        |
| # 1 | <p>TS=((peripheral NEAR/2 (nerve* or nervous) NEAR/2 (disease* or disorder*)) or "peripheral neuropath*")</p> <p>Indexes=SCI-EXPANDED Timespan=All years</p>                                                                                                                                                                                                                                                                                                                                                                                                                                                                                                                                                                                                                                                                                                         |

**Update: Web of Science Classic Core Collection: Science Citation Index Expanded (SCI-EXPANDED) – 1975 to present.**

Timespan: 2020-01-01 to 2030-12-31. Limited results to 2020 to present (searched on December 08, 2021). <https://www.webofscience.com/wos/woscc/summary/fd7782bf-5730-4b8a-9ab4-18ded8223ad3-17f74533/relevance/1>

|      |                                                                                                                                                       |
|------|-------------------------------------------------------------------------------------------------------------------------------------------------------|
| # 23 | #21 AND #14 and 2021 or 2020 (Publication Years)<br>  Exact search                                                                                    |
| # 22 | #21 AND #14<br>  Exact search                                                                                                                         |
| # 21 | #20 OR #19 OR #18 OR #17<br>  Exact search                                                                                                            |
| # 20 | TS=(beriberi or pellagra or scurvy or rickets or osteomalacia or hypocalcem* or hypocalcem* or hypercalcem* or hyper-calcem* or hypocalcaem* or hypo- |

|      |                                                                                                                                                                                                                                                                                                                                                                                                                                                                                                                                                                                                                                                                                                                                                                                                                                                                                                                                                                                                                                                                                                                                                                                                                                                                                                                                                                                                                                                                                                                      |
|------|----------------------------------------------------------------------------------------------------------------------------------------------------------------------------------------------------------------------------------------------------------------------------------------------------------------------------------------------------------------------------------------------------------------------------------------------------------------------------------------------------------------------------------------------------------------------------------------------------------------------------------------------------------------------------------------------------------------------------------------------------------------------------------------------------------------------------------------------------------------------------------------------------------------------------------------------------------------------------------------------------------------------------------------------------------------------------------------------------------------------------------------------------------------------------------------------------------------------------------------------------------------------------------------------------------------------------------------------------------------------------------------------------------------------------------------------------------------------------------------------------------------------|
|      | calcaem* or hypercalcaem* or hyper-calcaem* or hypocalciur* or hypocalciur* or hypercalciur* or hyper-calciur* or hypomagnesium* or hypomagnesium* or hypermagnesium* or hyper-magnesium* or hypomagnesaem* or hypomagnesaem* or hypermagnesaem* or hyper-magnesaem* or hypoalbuminem* or hypoalbuminem* or hyperalbuminem* or hyper-albuminem* or hypoalbuminaem* or hypoalbuminaem* or hyperalbuminaem* or hyper-albuminaem* or hypokalem* or hypokalem* or hyperkalem* or hyper-kalem* or hypokalaem* or hypokalaem* or hyperkalaem* or hyper-kalaem* or hypohomocysteinem* or hypohomocysteinem* or hyperhomocysteinem* or hyper-homocysteinem*)<br>  Exact search                                                                                                                                                                                                                                                                                                                                                                                                                                                                                                                                                                                                                                                                                                                                                                                                                                               |
| # 19 | TS=(undernutrition* or malnutrition* or avitaminosis or ((nutrition* or mineral* or metabolic or nutrient* or micronutrient* or micro-nutrient*)) NEAR/2 (deficien* or diseases or disorder*))<br>  Exact search                                                                                                                                                                                                                                                                                                                                                                                                                                                                                                                                                                                                                                                                                                                                                                                                                                                                                                                                                                                                                                                                                                                                                                                                                                                                                                     |
| # 18 | TS=((("complete blood" or "red blood cell" or erythrocyte or RBC or iron or reticulocyte) NEAR/1 (count or indices)) or "CBC" or "hemogram" or (("coronary risk" or lipid or cholesterol or prothrombin or prothrombine or protrombin) NEAR/1 (panel or test)) or Thrombotest or "Fe Tests")<br>  Exact search                                                                                                                                                                                                                                                                                                                                                                                                                                                                                                                                                                                                                                                                                                                                                                                                                                                                                                                                                                                                                                                                                                                                                                                                       |
| # 17 | #16 AND #15<br>  Exact search                                                                                                                                                                                                                                                                                                                                                                                                                                                                                                                                                                                                                                                                                                                                                                                                                                                                                                                                                                                                                                                                                                                                                                                                                                                                                                                                                                                                                                                                                        |
| # 16 | TS=(hemoglobin or hemoglobins or haemoglobin or hemoglobine or haemoglobine or haemoglobins or hemoglobulin or hematocrit or ferrohaemoglobin or ferrohemoglobin or erythrocytes or eryhem or albumin or albumen or prealbumin or pre-albumin or total-protein or leptin or globulin or globulins or polyglobulin or polyglobulin or choline or bursine or fagine or vidine or thiamin or thiamine or anemi* or anaemi* or aneurin or riboflavin or riboflavine or "flavin mononucleotide" or "flavin-adenine dinucleotide" or niacin or niacinamide or enduramide or nicobion or nicotinamide or nicotinsauareamid or papulex or "pantothenic acid" or "calcium pantothenate" or dexol or "zinc pantothenate" or "pyridoxal phosphate" or "pyridoxal 5-phosphate" or "pyridoxal-P" or biotin or folate or "folic acid" or folacin or folvite or folvit or "pteroylglutamic acid" or cobalamin or cobalamins or cyanocobalamin or eritron or "B1" or "B2" or "B3" or "B5" or "B6" or "B7" or "B9" or "B12" or (B NEAR/1 ("1" or "2" or "3" or "5" or "6" or "7" or "9" or "12")) or "methylmalonic acid" or "methyl malonate" or "methyl malonic acid" or methylmalonate or retinol or carotene or "Aquasol A" or phytomenadione or menaquinone or menadione or calcium or chloride or magnesium or phosphorus or romag or potassium or kalium or sodium or chromium or copper or fluoride or iodine or iron or "Fe" or "Fe+++" or ferro or ferrum or manganese or molybdenum or selenium or zinc)<br>  Exact search |
| # 15 | TS=((laboratory NEAR/2 (marker or markers or values or test* or technique* or service or services or diagnos* or examin* or evaluat*)) or ("lab test" or "lab tests" or "lab result" or "lab results" or "lab value" or "lab values" or deficien*))<br>  Exact search                                                                                                                                                                                                                                                                                                                                                                                                                                                                                                                                                                                                                                                                                                                                                                                                                                                                                                                                                                                                                                                                                                                                                                                                                                                |
| # 14 | #13 OR #12<br>  Exact search                                                                                                                                                                                                                                                                                                                                                                                                                                                                                                                                                                                                                                                                                                                                                                                                                                                                                                                                                                                                                                                                                                                                                                                                                                                                                                                                                                                                                                                                                         |
| # 13 | TS=((chemo* or antineoplas* or anti-neoplas* or anticancer* or anti-cancer* or anticarcino* or anti-carcino* or antitumor or anti-tumor or antitumour or anti-tumour or carcinochemo* or carcinostatic or "tumor inhibitor" or "tumour inhibitor") NEAR/3 (neuropath* or neuralgia or neurotox* or mononeuropath* or mono-neuropath* or polyneuropath* or polyneuropath*))<br>  Exact search                                                                                                                                                                                                                                                                                                                                                                                                                                                                                                                                                                                                                                                                                                                                                                                                                                                                                                                                                                                                                                                                                                                         |
| # 12 | #11 AND #3<br>  Exact search                                                                                                                                                                                                                                                                                                                                                                                                                                                                                                                                                                                                                                                                                                                                                                                                                                                                                                                                                                                                                                                                                                                                                                                                                                                                                                                                                                                                                                                                                         |
| # 11 | #10 OR #9 OR #8 OR #7 OR #6 OR #5 OR #4<br>  Exact search                                                                                                                                                                                                                                                                                                                                                                                                                                                                                                                                                                                                                                                                                                                                                                                                                                                                                                                                                                                                                                                                                                                                                                                                                                                                                                                                                                                                                                                            |

|      |                                                                                                                                                                                                                                                                                                                                                                                                                                                                                                                                                                                                                                                                                                                                                                                                                                                                                                                                                                                                                                                                                                                                                                                                                                                                                                                                                                                                                                                                                                                                                                                                                                                                                                                                                                                    |
|------|------------------------------------------------------------------------------------------------------------------------------------------------------------------------------------------------------------------------------------------------------------------------------------------------------------------------------------------------------------------------------------------------------------------------------------------------------------------------------------------------------------------------------------------------------------------------------------------------------------------------------------------------------------------------------------------------------------------------------------------------------------------------------------------------------------------------------------------------------------------------------------------------------------------------------------------------------------------------------------------------------------------------------------------------------------------------------------------------------------------------------------------------------------------------------------------------------------------------------------------------------------------------------------------------------------------------------------------------------------------------------------------------------------------------------------------------------------------------------------------------------------------------------------------------------------------------------------------------------------------------------------------------------------------------------------------------------------------------------------------------------------------------------------|
| # 10 | TS=(antineoplastic or chemotherap* or chemo-therap* or ((anticancer* or anti-cancer* or anticarcino* or anti-carcino* or antitumor or anti-tumor or antitumour* or anti-tumour* or carcinostatic) NEAR/2 (therap* or agent or agents or treatment* or management*)) or carcinochemo* or "tumor inhibitor" or "tumour inhibitor")<br>  Exact search                                                                                                                                                                                                                                                                                                                                                                                                                                                                                                                                                                                                                                                                                                                                                                                                                                                                                                                                                                                                                                                                                                                                                                                                                                                                                                                                                                                                                                 |
| # 9  | TS=("thalidomide" or "beta thalidomide" or "contergan" or "distaval" or "isomin" or "k 17" or "kedavon" or "kevadon" or "neurosedine" or "neurosedine" or "nsc 66847" or "sedalis" or "shin naito" or "softenon" or "synovir" or "talimol" or "talizer" or "telagan" or "telargan" or "thado" or "thalidomid" or "thalidomide celgene" or "thalimodide" or "thalix" or "thalomid")<br>  Exact search                                                                                                                                                                                                                                                                                                                                                                                                                                                                                                                                                                                                                                                                                                                                                                                                                                                                                                                                                                                                                                                                                                                                                                                                                                                                                                                                                                               |
| # 8  | TS=("bortezomib" or "ldp 341" or "ldp341" or "mg 341" or "mg341" or "mln 341" or "mln341" or "ps 341" or "ps341" or "velcade" or "vincristine" or "l 37231" or "l37231" or "vin cristine" or "vincristin" or "vincrisul" or "vinblastine" or "le 29060" or "le29060" or "leukoblastin" or "rozevin" or "vin blastine" or "vinblastin" or "vincaleucoblastin" or "vincaleucoblastine" or "vincaleukoblastine" or "vincoblastin" or "vincoblastine" or "vincoleucoblastine" or "vincoleukoblastin" or "vinleucoblastine")<br>  Exact search                                                                                                                                                                                                                                                                                                                                                                                                                                                                                                                                                                                                                                                                                                                                                                                                                                                                                                                                                                                                                                                                                                                                                                                                                                          |
| # 7  | TS=("cisplatin" or "abiplatin" or "biocisplatinum" or "biocysplatinum" or "blastolem" or "briplatin" or "cddp ti" or "cis ddp" or "cis diamine dichloroplatinum" or "cis diaminechloroplatinum" or "cis diaminedichloroplatinum" or "cis diammine dichloroplatinum" or "cis diamminedichloroplatinum" or "cis dichlorodiammineplatinum" or "cis dichlorodiamine platinum" or "cis dichlorodiamine platinum" or "cis dichlorodiammineplatinum" or "cis platinum diamino dichloride" or "cis platinum" or "cis platinum diamine dichloride" or "cis platinum diaminedichloride" or "cis platinum diamino dichloride" or "cis platinum diaminochloride" or "cis platinum diaminodichloride" or "cis platinum diammine dichloride" or "cis platinum diamminedichloride" or "cisplatin liposomal" or "cisplatin therapeutic implant" or "cisplatin-ebewe" or "cisplatine" or "cisplatino" or "cisplatinum" or "cisplatyl" or "citoplatino" or "cytoplatin" or "cytosplat" or "diamine dichloroplatinum" or "diaminodichloroplatinum" or "diamminedichloroplatinum" or "dichlorodiamine platinum" or "dichlorodiammineplatinum" or "docistin" or "elvecis" or "kemoplat" or "lederplatin" or "lipoplatin" or "liposomal cisplatin" or "mpi 5010" or "mpi5010" or "neoplatin" or "niyaplat" or "nk 801" or "noveldexis" or "nsc 119875" or "platamine" or "platamine rtu" or "platiblastin" or "platidiam" or "platimine" or "platinox" or "platinitil" or "platinol" or "platinol aq" or "platinoxan" or "platinum diamine dichloride" or "platinum diaminedichloride" or "platinum diamminodichloride" or "platinum diamminedichloride" or "platiran" or "platistil" or "platistin" or "platosin" or "randa" or "romcis" or "sicatein" or "spi 077" or "tecnoplatin")<br>  Exact search |
| # 6  | TS=("oxaliplatin" or "axiplatin" or "crisapla" or "croloxat" or "dacotin" or "dacplat" or "ebeoxal" or "elatofen" or "eloxatin" or "eloxatine" or "elplat" or "geneplatin" or "heloxatin" or "lipoxal" or "mbp 426" or "mbp426" or "medoxa" or "oplat" or "oxalatoplatinum" or "oxalatplatin" or "oxali" or "oxalip" or "oxaliplan" or "oxaliplatina" or "oxaliprol" or "oxaliquid" or "oxalisan" or "oxalisin" or "oxalizer" or "oxaltic" or "oxaltina" or "oxaplamiyl" or "oxaviatin" or "platox" or "plaxitin" or "rectoxal" or "riboxatin" or "rp 54780" or "rp54780" or "sinoxal" or "sr 96669" or "sr96669" or "transplastin" or "velminox" or "xaliplat" or "xoplan")<br>  Exact search                                                                                                                                                                                                                                                                                                                                                                                                                                                                                                                                                                                                                                                                                                                                                                                                                                                                                                                                                                                                                                                                                     |
| # 5  | TS=("docetaxel" or "daxotel" or "dexotel" or "docefrez" or "docetaxel accord" or "lit 976" or "lit976" or "n debenzoyl n tert butoxycarbonyl 10 deacetylaxol" or "n tert butoxycarbonyl 10 deacetyl n debenzoylaxol" or "nsc 628503" or "nsc628503" or "oncodocel" or "rp 56976" or "rp56976" or "taxespira" or "taxoter" or "taxotere" or "textot")<br>  Exact search                                                                                                                                                                                                                                                                                                                                                                                                                                                                                                                                                                                                                                                                                                                                                                                                                                                                                                                                                                                                                                                                                                                                                                                                                                                                                                                                                                                                             |
| # 4  | TS=("paclitaxel" or "abi 007" or "abi007" or "abraxane" or "albumin bound paclitaxel" or "anzatax" or "apealea" or "asotax" or "biotax" or "bms 181339" or "bms181339" or "bmy 45622" or "bmy45622" or "br                                                                                                                                                                                                                                                                                                                                                                                                                                                                                                                                                                                                                                                                                                                                                                                                                                                                                                                                                                                                                                                                                                                                                                                                                                                                                                                                                                                                                                                                                                                                                                         |

|   |                                                                                                                                                                                                                                                                                                                                                                                                                                                                                                                                                                                                                       |
|---|-----------------------------------------------------------------------------------------------------------------------------------------------------------------------------------------------------------------------------------------------------------------------------------------------------------------------------------------------------------------------------------------------------------------------------------------------------------------------------------------------------------------------------------------------------------------------------------------------------------------------|
|   | istaxol" or "britaxol" or "coroxane" or "dts 301" or "dts301" or "endotag-1" or "formoxol" or "genexol" or "genexol pm" or "hunxol" or "ifaxol" or "infinium" or "intaxe1" or "mbt 0206" or "mbt0206" or "medixel" or "mitotax" or "nab paclitaxel" or "nanoparticle albumin bound paclitaxel" or "nsc 125973" or "nsc 673089" or "nsc125973" or "nsc673089" or "oas pac 100" or "oaspac100" or "oncogel" or "onxol" or "pacitaxel" or "paclitaxel nab" or "pacxel" or "padexol" or "parexel" or "paxceed" or "paxene" or "paxus" or "praxel" or "taxocris" or "taxol" or "taycovit" or "yewtaxan")<br>  Exact search |
| 3 | #2 OR #1<br>  Exact search                                                                                                                                                                                                                                                                                                                                                                                                                                                                                                                                                                                            |
| 2 | TS=(PNS NEAR/2 (disease* or disorder*))<br>  Exact search                                                                                                                                                                                                                                                                                                                                                                                                                                                                                                                                                             |
| 1 | TS=((peripheral NEAR/2 (nerve* or nervous) NEAR/2 (disease* or disorder*)) or "peripheral neuropath*")<br>  Exact search                                                                                                                                                                                                                                                                                                                                                                                                                                                                                              |

## 7. Web of Science Core Collection: Citation Indexes

- **Emerging Sources Citation Index (ESCI) --2015-present**

Data last updated: 2020-06-03 – searched June 4, 2020.

|      |                                                                                                                                                                                                                                                                                                                                                                                                                                                                                             |
|------|---------------------------------------------------------------------------------------------------------------------------------------------------------------------------------------------------------------------------------------------------------------------------------------------------------------------------------------------------------------------------------------------------------------------------------------------------------------------------------------------|
| # 27 | #26 OR #24<br>Indexes=ESCI Timespan=All years                                                                                                                                                                                                                                                                                                                                                                                                                                               |
| # 26 | #22 AND #25<br>Indexes=ESCI Timespan=All years                                                                                                                                                                                                                                                                                                                                                                                                                                              |
| # 25 | TS=(adult or adults or aged or elderly)<br>Indexes=ESCI Timespan=All years                                                                                                                                                                                                                                                                                                                                                                                                                  |
| # 24 | #22 NOT #23<br>Indexes=ESCI Timespan=All years                                                                                                                                                                                                                                                                                                                                                                                                                                              |
| # 23 | TS=(infan* OR newborn* OR newborn* OR perinat* OR neonat* OR baby OR baby* OR babies OR toddler* OR minors OR minors* OR boy OR boys OR boyfriend OR boyhood OR girl* OR kid OR kids OR child OR child* OR children* OR schoolchild* OR schoolchild OR adolescen* OR juvenil* OR youth* OR teen* OR under*age* OR pubescen* OR pediatric* OR paediatric* OR peadiatric* OR prematur* OR preterm*OR school child OR "school child*" OR school OR school*)<br>Indexes=ESCI Timespan=All years |
| # 22 | #21 AND #14<br>Indexes=ESCI Timespan=All years                                                                                                                                                                                                                                                                                                                                                                                                                                              |
| # 21 | #20 OR #19 OR #18 OR #17<br>Indexes=ESCI Timespan=All years                                                                                                                                                                                                                                                                                                                                                                                                                                 |
| # 20 | TS=(beriberi or pellagra or scurvy or rickets or osteomalacia or hypocalcem* or hypocalcem* or hypercalcem* or hyper-calcem* or hypocalcaem* or hypocalcaem* or hypercalcaem* or hyper-calcaem* or hypocalciur* or hypocalciur* or hypercalciur* or hyper-calciur* or hypomagnesem* or hypomagnesem* or hypermagnesem* or hyper-magnesem* or hypomagnesaem* or hypo-                                                                                                                        |

|      |                                                                                                                                                                                                                                                                                                                                                                                                                                                                                                                                                                                                                                                                                                                                                                                                                                                                                                                                                                                                                                                                                                                                                                                                                                                                                                                                                                                                                                                                                                                                         |
|------|-----------------------------------------------------------------------------------------------------------------------------------------------------------------------------------------------------------------------------------------------------------------------------------------------------------------------------------------------------------------------------------------------------------------------------------------------------------------------------------------------------------------------------------------------------------------------------------------------------------------------------------------------------------------------------------------------------------------------------------------------------------------------------------------------------------------------------------------------------------------------------------------------------------------------------------------------------------------------------------------------------------------------------------------------------------------------------------------------------------------------------------------------------------------------------------------------------------------------------------------------------------------------------------------------------------------------------------------------------------------------------------------------------------------------------------------------------------------------------------------------------------------------------------------|
|      | magnesaem* or hypermagnesaem* or hyper-magnesaem* or hypoalbuminem* or hypoalbuminem* or hyperalbuminem* or hyper-albuminem* or hypoalbuminaem* or hypoalbuminaem* or hyperalbuminaem* or hyper-albuminaem* or hypokalem* or hypokalem* or hyperkalem* or hyper-kalem* or hypokalaem* or hypokalaem* or hyperkalaem* or hyper-kalaem* or hypohomocysteinem* or hypohomocysteinem* or hyperhomocysteinem* or hyper-homocysteinem*)<br>Indexes=ESCI Timespan=All years                                                                                                                                                                                                                                                                                                                                                                                                                                                                                                                                                                                                                                                                                                                                                                                                                                                                                                                                                                                                                                                                    |
| # 19 | TS=(undernutrition* or malnutrition* or avitaminosis or ((nutrition* or mineral* or metabolic or nutrient* or micronutrient* or micro-nutrient*) NEAR/2 (deficien* or diseases or disorder*) ))<br>Indexes=ESCI Timespan=All years                                                                                                                                                                                                                                                                                                                                                                                                                                                                                                                                                                                                                                                                                                                                                                                                                                                                                                                                                                                                                                                                                                                                                                                                                                                                                                      |
| # 18 | TS=((("complete blood" or "red blood cell" or erythrocyte or RBC or iron or reticulocyte) NEAR/1 (count or indices) ) or "CBC" or "hemogram" or (("coronary risk" or lipid or cholesterol or prothrombin or prothrombine or protrombin) NEAR/1 (panel or test) ) or Thrombotest or "Fe Tests")<br>Indexes=ESCI Timespan=All years                                                                                                                                                                                                                                                                                                                                                                                                                                                                                                                                                                                                                                                                                                                                                                                                                                                                                                                                                                                                                                                                                                                                                                                                       |
| # 17 | #16 AND #15<br>Indexes=ESCI Timespan=All years                                                                                                                                                                                                                                                                                                                                                                                                                                                                                                                                                                                                                                                                                                                                                                                                                                                                                                                                                                                                                                                                                                                                                                                                                                                                                                                                                                                                                                                                                          |
| # 16 | TS=(hemoglobin or hemoglobins or haemoglobin or hemoglobine or haemoglobine or haemoglobins or hemoglobulin or hematocrit or ferrohaemoglobin or ferrohemoglobin or erythrocytes or erythem or albumin or albumen or prealbumin or pre-albumin or total-protein or leptin or globulin or globulins or polyglobulin or polyglobulin or choline or bursine or fagine or vidine or thiamin or thiamine or anemi* or anaemi* or aneurin or riboflavin or riboflavine or "flavin mononucleotide" or "flavin-adenine dinucleotide" or niacin or niacinamide or enduramide or nicobion or nicotinamide or nicotinsaureamid or papulex or "pantothenic acid" or "calcium pantothenate" or dexol or "zinc pantothenate" or "pyridoxal phosphate" or "pyridoxal 5-phosphate" or "pyridoxal-P" or biotin or folate or "folic acid" or folacin or folvite or folvit or "pteroylglutamic acid" or cobalamin or cobalamins or cyanocobalamin or eritron or "B1" or "B2" or "B3" or "B5" or "B6" or "B7" or "B9" or "B12" or (B NEAR/1 ("1" or "2" or "3" or "5" or "6" or "7" or "9" or "12")) ) or "methylmalonic acid" or "methyl malonate" or "methyl malonic acid" or methylmalonate or retinol or carotene or "Aquasol A" or phytomenadione or menaquinone or menadione or calcium or chloride or magnesium or phosphorus or romag or potassium or kalium or sodium or chromium or copper or fluoride or iodine or iron or "Fe" or "Fe+++" or ferro or ferrum or manganese or molybdenum or selenium or zinc)<br>Indexes=ESCI Timespan=All years |
| # 15 | TS=((laboratory NEAR/2 (marker or markers or values or test* or technique* or service or services or diagnos* or examin* or evaluat*) ) or ("lab test" or "lab tests" or "lab result" or "lab results" or "lab value" or "lab values" or deficient*) )<br>Indexes=ESCI Timespan=All years                                                                                                                                                                                                                                                                                                                                                                                                                                                                                                                                                                                                                                                                                                                                                                                                                                                                                                                                                                                                                                                                                                                                                                                                                                               |
| # 14 | #13 OR #12<br>Indexes=ESCI Timespan=All years                                                                                                                                                                                                                                                                                                                                                                                                                                                                                                                                                                                                                                                                                                                                                                                                                                                                                                                                                                                                                                                                                                                                                                                                                                                                                                                                                                                                                                                                                           |
| # 13 | TS=((chemo* or antineoplas* or anti-neoplas* or anticancer* or anticancer* or anticarcino* or anti-carcino* or antitumor or anti-tumor or antitumour or anti-tumour or carcinochemo* or carcinostatic or "tumor inhibitor" or "tumour inhibitor") NEAR/3 (neuropath* or neuralgia or neurotox* or mononeuropath* or mono-neuropath* or polyneuropath* or polyneuropath*) )<br>Indexes=ESCI Timespan=All years                                                                                                                                                                                                                                                                                                                                                                                                                                                                                                                                                                                                                                                                                                                                                                                                                                                                                                                                                                                                                                                                                                                           |
| # 12 | #11 AND #3                                                                                                                                                                                                                                                                                                                                                                                                                                                                                                                                                                                                                                                                                                                                                                                                                                                                                                                                                                                                                                                                                                                                                                                                                                                                                                                                                                                                                                                                                                                              |

|      |                                                                                                                                                                                                                                                                                                                                                                                                                                                                                                                                                                                                                                                                                                                                                                                                                                                                                                                                                                                                                                                                                                                                                                                                                                                                                                                                                                                                                                                                                                                                                                                                                                                                                                                                                                                        |
|------|----------------------------------------------------------------------------------------------------------------------------------------------------------------------------------------------------------------------------------------------------------------------------------------------------------------------------------------------------------------------------------------------------------------------------------------------------------------------------------------------------------------------------------------------------------------------------------------------------------------------------------------------------------------------------------------------------------------------------------------------------------------------------------------------------------------------------------------------------------------------------------------------------------------------------------------------------------------------------------------------------------------------------------------------------------------------------------------------------------------------------------------------------------------------------------------------------------------------------------------------------------------------------------------------------------------------------------------------------------------------------------------------------------------------------------------------------------------------------------------------------------------------------------------------------------------------------------------------------------------------------------------------------------------------------------------------------------------------------------------------------------------------------------------|
|      | Indexes=ESCI Timespan=All years                                                                                                                                                                                                                                                                                                                                                                                                                                                                                                                                                                                                                                                                                                                                                                                                                                                                                                                                                                                                                                                                                                                                                                                                                                                                                                                                                                                                                                                                                                                                                                                                                                                                                                                                                        |
| # 11 | #10 OR #9 OR #8 OR #7 OR #6 OR #5 OR #4<br>Indexes=ESCI Timespan=All years                                                                                                                                                                                                                                                                                                                                                                                                                                                                                                                                                                                                                                                                                                                                                                                                                                                                                                                                                                                                                                                                                                                                                                                                                                                                                                                                                                                                                                                                                                                                                                                                                                                                                                             |
| # 10 | TS=(antineoplastic or chemotherap* or chemo-therap* or ((anticancer* or anti-cancer* or anticarcino* or anti-carcino* or antitumor or anti-tumor or antitumour* or anti-tumour* or carcinostatic) NEAR/2 (therap* or agent or agents or treatment* or management*)) or carcinochemo* or "tumor inhibitor" or "tumour inhibitor")<br>Indexes=ESCI Timespan=All years                                                                                                                                                                                                                                                                                                                                                                                                                                                                                                                                                                                                                                                                                                                                                                                                                                                                                                                                                                                                                                                                                                                                                                                                                                                                                                                                                                                                                    |
| # 9  | TS=("thalidomide"<br>or "beta thalidomide" or "contergan" or "distaval" or "isomin" or "k 17" or "kedavon" or "kevadon" or "neurosedin" or "neurosedyne" or "nsc 66847" or "sedalis" or "shin naito" or "softenon" or "synovir" or "talimol" or "talizer" or "telagan" or "telargan" or "thado" or "thalidomid" or "thalidomide celgene" or "thalimodide" or "thalix" or "thalomid")<br>Indexes=ESCI Timespan=All years                                                                                                                                                                                                                                                                                                                                                                                                                                                                                                                                                                                                                                                                                                                                                                                                                                                                                                                                                                                                                                                                                                                                                                                                                                                                                                                                                                |
| # 8  | TS=("bortezomib"<br>or "ldp 341" or "ldp341" or "mg 341" or "mg341" or "mln 341" or "mln341" or "ps 341" or "ps341" or "velcade" or "vincristine" or "l 37231" or "l37231" or "vin cristine" or "vincristin" or "vincrisul" or "vinblastine" or "le 29060" or "le29060" or "leukoblastin" or "rozevin" or "vin blastine" or "vinblastin" or "vincaleucoblastin" or "vincaleucoblastine" or "vincaleukoblastine" or "vincoblastin" or "vincoblastine" or "vincoleucoblastine" or "vincoleukoblastin" or "vinleucoblastine")<br>Indexes=ESCI Timespan=All years                                                                                                                                                                                                                                                                                                                                                                                                                                                                                                                                                                                                                                                                                                                                                                                                                                                                                                                                                                                                                                                                                                                                                                                                                          |
| # 7  | TS=("cisplatin"<br>or "abiplatin" or "biocisplatinum" or "biocysplatinum" or "blastolem" or "briplatin" or "cddp ti" or "cis ddp" or "cis diamine dichloroplatinum" or "cis diaminechloroplatinum" or "cis diaminedichloroplatinum" or "cis diammine dichloroplatinum" or "cis diamminedichloroplatinum" or "cis dichlorodiammineplatinum" or "cis dichloroadiamine platinum" or "cis dichlorodiamine platinum" or "cis dichlorodiammineplatinum" or "cis platinous diamino dichloride" or "cis platinum" or "cis platinum diamine dichloride" or "cis platinum diaminedichloride" or "cis platinum diamino dichloride" or "cis platinum diaminochloride" or "cis platinum diaminodichloride" or "cis platinum diammine dichloride" or "cis platinum diamminedichloride" or "cisplatin liposomal" or "cisplatin therapeutic implant" or "cisplatin-ebewe" or "cisplatin" or "cisplatino" or "cisplatinum" or "cisplatyl" or "citoplatino" or "cytoplatin" or "cytosplat" or "diamine dichloroplatinum" or "diaminodichloroplatinum" or "diamminedichloroplatinum" or "dichlorodiamine platinum" or "dichlorodiammineplatinum" or "docistin" or "elvecis" or "kemoplat" or "lederplatin" or "lipoplatin" or "liposomal cisplatin" or "mpi 5010" or "mpi5010" or "neoplatin" or "niyaplat" or "nk 801" or "noveldexis" or "nsc 119875" or "platamine" or "platamine rtu" or "platiblastin" or "platidiam" or "platimine" or "platinex" or "platiniol" or "platinol aq" or "platinoxan" or "platinum diamine dichloride" or "platinum diaminedichloride" or "platinum diaminodichloride" or "platinum diamminedichloride" or "platiran" or "platistil" or "platistin" or "platosin" or "randa" or "romcis" or "sicatem" or "spi 077" or "tecnoplatin")<br>Indexes=ESCI Timespan=All years |
| # 6  | TS=("oxaliplatin"<br>or "axiplatin" or "crisapla" or "croloxat" or "dacotin" or "dacplat" or "ebeoxal" or "elatofen" or "eloxatin" or "eloxatine" or "elplat" or "geneplatin" or "heloxatin" or "lipoxal" or "mbp 426" or "mbp426" or "medoxa" or "oplat" or "oxalatoplatinum" or "oxalatplatin" or "oxali" or "oxalip" or "oxaliplan" or "oxaliplatina" or "oxaliprol" or "oxaliquid" or "oxalisan" or "oxalisin" or "oxalizo                                                                                                                                                                                                                                                                                                                                                                                                                                                                                                                                                                                                                                                                                                                                                                                                                                                                                                                                                                                                                                                                                                                                                                                                                                                                                                                                                         |

|     |                                                                                                                                                                                                                                                                                                                                                                                                                                                                                                                                                                                                                                                                                                                                                                                                                                                          |
|-----|----------------------------------------------------------------------------------------------------------------------------------------------------------------------------------------------------------------------------------------------------------------------------------------------------------------------------------------------------------------------------------------------------------------------------------------------------------------------------------------------------------------------------------------------------------------------------------------------------------------------------------------------------------------------------------------------------------------------------------------------------------------------------------------------------------------------------------------------------------|
|     | r" or "oxaltic" or "oxaltina" or "oxaplamyl" or "oxaviatin" or "platox" or "plaxitin" or "rectoxal" or "riboxatin" or "rp 54780" or "rp54780" or "sinoxal" or "sr 96669" or "sr96669" or "transplast in" or "velminox" or "xaliplat" or "xoplan")<br>Indexes=ESCI Timespan=All years                                                                                                                                                                                                                                                                                                                                                                                                                                                                                                                                                                     |
| # 5 | TS=("docetaxel" or "daxotel" or "dexotel" or "docefrez" or "docetaxel accord" or "lit 976" or "lit976" or "n debe nzoyl n tert butoxycarbonyl 10 deacetyltaxol" or "n tert butoxycarbonyl 10 deacetyl n debenzoylt axol" or "nsc 628503" or "nsc628503" or "oncodocel" or "rp 56976" or "rp56976" or "taxespira" or "taxoter" or "taxotere" or "texot")<br>Indexes=ESCI Timespan=All years                                                                                                                                                                                                                                                                                                                                                                                                                                                               |
| # 4 | TS=("paclitaxel" or "abi 007" or "abi007" or "abraxane" or "albumin bound paclitaxel" or "anzatax" or "apealea" or "asotax" or "biotax" or "bms 181339" or "bms181339" or "bmy 45622" or "bmy45622" or "b ristaxol" or "britaxol" or "coroxane" or "dts 301" or "dts301" or "endotag- l" or "formoxol" or "genexol" or "genexol pm" or "hunxol" or "ifaxol" or "infinnium" or "intax el" or "mbt 0206" or "mbt0206" or "medixel" or "mitotax" or "nab paclitaxel" or "nanoparticle a lbumin bound paclitaxel" or "nsc 125973" or "nsc 673089" or "nsc125973" or "nsc673089" or "o as pac 100" or "oaspac100" or "oncogel" or "onxol" or "pacitaxel" or "paclitaxel nab" or "pacxe l" or "padexol" or "parexel" or "paxceed" or "paxene" or "paxus" or "praxel" or "taxocris" or "t axol" or "taycovit" or "yewtaxan")<br>Indexes=ESCI Timespan=All years |
| # 3 | #2 OR #1<br>Indexes=ESCI Timespan=All years                                                                                                                                                                                                                                                                                                                                                                                                                                                                                                                                                                                                                                                                                                                                                                                                              |
| # 2 | TS=(PNS NEAR/2 (disease* or disorder* ) )<br>Indexes=ESCI Timespan=All years                                                                                                                                                                                                                                                                                                                                                                                                                                                                                                                                                                                                                                                                                                                                                                             |
| # 1 | TS=((peripheral NEAR/2 (nerve* or nervous) NEAR/2 (disease* or disorder* ) ) or "peripheral neuropath*")<br>Indexes=ESCI Timespan=All years                                                                                                                                                                                                                                                                                                                                                                                                                                                                                                                                                                                                                                                                                                              |

Update: **Web of Science Core Collection: Emerging Sources Citation Index (ESCI)** --2015-present

Timespan: 2020-01-01 to 2030-12-31. Limited results to 2020 to present (searched on December 08, 2021). <https://www.webofscience.com/wos/woscc/summary/2b719d27-efc4-49c1-9faf-1ecd01bdbca-17f74876/relevance/1>

|      |                                                                                                                                                            |
|------|------------------------------------------------------------------------------------------------------------------------------------------------------------|
| # 23 | #21 AND #14 and 2021 or 2020 (Publication Years)<br>  Exact search                                                                                         |
| # 22 | #21 AND #14<br>  Exact search                                                                                                                              |
| # 21 | #20 OR #19 OR #18 OR #17<br>  Exact search                                                                                                                 |
| # 20 | TS=(beriberi or pellagra or scurvy or rickets or osteomalacia or hypocalcem* or hypo-<br>calcem* or hypercalcem* or hyper-calcem* or hypocalcaem* or hypo- |



|      |                                                                                                                                                                                                                                                                                                                                                                                                                                                                                                                                                                                                                                                                                                                                                                                                                                                                                                                                                                                                                                                                                                                                                                                                                                                                                                                                                                                                                                                                                                                      |
|------|----------------------------------------------------------------------------------------------------------------------------------------------------------------------------------------------------------------------------------------------------------------------------------------------------------------------------------------------------------------------------------------------------------------------------------------------------------------------------------------------------------------------------------------------------------------------------------------------------------------------------------------------------------------------------------------------------------------------------------------------------------------------------------------------------------------------------------------------------------------------------------------------------------------------------------------------------------------------------------------------------------------------------------------------------------------------------------------------------------------------------------------------------------------------------------------------------------------------------------------------------------------------------------------------------------------------------------------------------------------------------------------------------------------------------------------------------------------------------------------------------------------------|
|      | calcaem* or hypercalcaem* or hyper-calcaem* or hypocalciur* or hypocalciur* or hypercalciur* or hyper-calciur* or hypomagnesium* or hypomagnesium* or hypermagnesium* or hyper-magnesium* or hypomagnesaem* or hypomagnesaem* or hypermagnesaem* or hyper-magnesaem* or hypoalbuminem* or hypoalbuminem* or hyperalbuminem* or hyper-albuminem* or hypoalbuminaem* or hypoalbuminaem* or hyperalbuminaem* or hyper-albuminaem* or hypokalem* or hypokalem* or hyperkalem* or hyper-kalem* or hypokalaem* or hypokalaem* or hyperkalaem* or hyper-kalaem* or hypohomocysteinem* or hypohomocysteinem* or hyperhomocysteinem* or hyper-homocysteinem*)<br>  Exact search                                                                                                                                                                                                                                                                                                                                                                                                                                                                                                                                                                                                                                                                                                                                                                                                                                               |
| # 19 | TS=(undernutrition* or malnutrition* or avitaminosis or ((nutrition* or mineral* or metabolic or nutrient* or micronutrient* or micro-nutrient*)) NEAR/2 (deficien* or diseases or disorder*))<br>  Exact search                                                                                                                                                                                                                                                                                                                                                                                                                                                                                                                                                                                                                                                                                                                                                                                                                                                                                                                                                                                                                                                                                                                                                                                                                                                                                                     |
| # 18 | TS=((("complete blood" or "red blood cell" or erythrocyte or RBC or iron or reticulocyte) NEAR/1 (count or indices)) or "CBC" or "hemogram" or (("coronary risk" or lipid or cholesterol or prothrombin or prothrombine or protrombin) NEAR/1 (panel or test)) or Thrombotest or "Fe Tests")<br>  Exact search                                                                                                                                                                                                                                                                                                                                                                                                                                                                                                                                                                                                                                                                                                                                                                                                                                                                                                                                                                                                                                                                                                                                                                                                       |
| # 17 | #16 AND #15<br>  Exact search                                                                                                                                                                                                                                                                                                                                                                                                                                                                                                                                                                                                                                                                                                                                                                                                                                                                                                                                                                                                                                                                                                                                                                                                                                                                                                                                                                                                                                                                                        |
| # 16 | TS=(hemoglobin or hemoglobins or haemoglobin or hemoglobine or haemoglobine or haemoglobins or hemoglobulin or hematocrit or ferrohaemoglobin or ferrohemoglobin or erythrocytes or eryhem or albumin or albumen or prealbumin or pre-albumin or total-protein or leptin or globulin or globulins or polyglobulin or polyglobulin or choline or bursine or fagine or vidine or thiamin or thiamine or anemi* or anaemi* or aneurin or riboflavin or riboflavine or "flavin mononucleotide" or "flavin-adenine dinucleotide" or niacin or niacinamide or enduramide or nicobion or nicotinamide or nicotinsauareamid or papulex or "pantothenic acid" or "calcium pantothenate" or dexol or "zinc pantothenate" or "pyridoxal phosphate" or "pyridoxal 5-phosphate" or "pyridoxal-P" or biotin or folate or "folic acid" or folacin or folvite or folvit or "pteroylglutamic acid" or cobalamin or cobalamins or cyanocobalamin or eritron or "B1" or "B2" or "B3" or "B5" or "B6" or "B7" or "B9" or "B12" or (B NEAR/1 ("1" or "2" or "3" or "5" or "6" or "7" or "9" or "12")) or "methylmalonic acid" or "methyl malonate" or "methyl malonic acid" or methylmalonate or retinol or carotene or "Aquasol A" or phytomenadione or menaquinone or menadione or calcium or chloride or magnesium or phosphorus or romag or potassium or kalium or sodium or chromium or copper or fluoride or iodine or iron or "Fe" or "Fe+++" or ferro or ferrum or manganese or molybdenum or selenium or zinc)<br>  Exact search |
| # 15 | TS=((laboratory NEAR/2 (marker or markers or values or test* or technique* or service or services or diagnos* or examin* or evaluat*)) or ("lab test" or "lab tests" or "lab result" or "lab results" or "lab value" or "lab values" or deficien*))<br>  Exact search                                                                                                                                                                                                                                                                                                                                                                                                                                                                                                                                                                                                                                                                                                                                                                                                                                                                                                                                                                                                                                                                                                                                                                                                                                                |
| # 14 | #13 OR #12<br>  Exact search                                                                                                                                                                                                                                                                                                                                                                                                                                                                                                                                                                                                                                                                                                                                                                                                                                                                                                                                                                                                                                                                                                                                                                                                                                                                                                                                                                                                                                                                                         |
| # 13 | TS=((chemo* or antineoplas* or anti-neoplas* or anticancer* or anti-cancer* or anticarcino* or anti-carcino* or antitumor or anti-tumor or antitumour or anti-tumour or carcinochemo* or carcinostatic or "tumor inhibitor" or "tumour inhibitor") NEAR/3 (neuropath* or neuralgia or neurotox* or mononeuropath* or mono-neuropath* or polyneuropath* or polyneuropath*))<br>  Exact search                                                                                                                                                                                                                                                                                                                                                                                                                                                                                                                                                                                                                                                                                                                                                                                                                                                                                                                                                                                                                                                                                                                         |
| # 12 | #11 AND #3<br>  Exact search                                                                                                                                                                                                                                                                                                                                                                                                                                                                                                                                                                                                                                                                                                                                                                                                                                                                                                                                                                                                                                                                                                                                                                                                                                                                                                                                                                                                                                                                                         |
| # 11 | #10 OR #9 OR #8 OR #7 OR #6 OR #5 OR #4<br>  Exact search                                                                                                                                                                                                                                                                                                                                                                                                                                                                                                                                                                                                                                                                                                                                                                                                                                                                                                                                                                                                                                                                                                                                                                                                                                                                                                                                                                                                                                                            |

|      |                                                                                                                                                                                                                                                                                                                                                                                                                                                                                                                                                                                                                                                                                                                                                                                                                                                                                                                                                                                                                                                                                                                                                                                                                                                                                                                                                                                                                                                                                                                                                                                                                                                                                                                                                                                |
|------|--------------------------------------------------------------------------------------------------------------------------------------------------------------------------------------------------------------------------------------------------------------------------------------------------------------------------------------------------------------------------------------------------------------------------------------------------------------------------------------------------------------------------------------------------------------------------------------------------------------------------------------------------------------------------------------------------------------------------------------------------------------------------------------------------------------------------------------------------------------------------------------------------------------------------------------------------------------------------------------------------------------------------------------------------------------------------------------------------------------------------------------------------------------------------------------------------------------------------------------------------------------------------------------------------------------------------------------------------------------------------------------------------------------------------------------------------------------------------------------------------------------------------------------------------------------------------------------------------------------------------------------------------------------------------------------------------------------------------------------------------------------------------------|
| # 10 | TS=(antineoplastic or chemotherap* or chemo-therap* or ((anticancer* or anti-cancer* or anticarcino* or anti-carcino* or antitumor or anti-tumor or antitumour* or anti-tumour* or carcinostatic) NEAR/2 (therap* or agent or agents or treatment* or management*)) or carcinochemo* or "tumor inhibitor" or "tumour inhibitor")<br>  Exact search                                                                                                                                                                                                                                                                                                                                                                                                                                                                                                                                                                                                                                                                                                                                                                                                                                                                                                                                                                                                                                                                                                                                                                                                                                                                                                                                                                                                                             |
| # 9  | TS=("thalidomide" or "beta thalidomide" or "contergan" or "distaval" or "isomin" or "k 17" or "kedavon" or "kevadon" or "neurosedine" or "neurosedine" or "nsc 66847" or "sedalis" or "shin naito" or "softenon" or "synovir" or "talimol" or "talizer" or "telagan" or "telargan" or "thado" or "thalidomid" or "thalidomide celgene" or "thalimodide" or "thalix" or "thalomid")<br>  Exact search                                                                                                                                                                                                                                                                                                                                                                                                                                                                                                                                                                                                                                                                                                                                                                                                                                                                                                                                                                                                                                                                                                                                                                                                                                                                                                                                                                           |
| # 8  | TS=("bortezomib" or "ldp 341" or "ldp341" or "mg 341" or "mg341" or "mln 341" or "mln341" or "ps 341" or "ps341" or "velcade" or "vincristine" or "l 37231" or "l37231" or "vin cristine" or "vincristin" or "vincrisul" or "vinblastine" or "le 29060" or "le29060" or "leukoblastin" or "rozevin" or "vin blastine" or "vinblastin" or "vincaleucoblastin" or "vincaleucoblastine" or "vincaleukoblastine" or "vincoblastin" or "vincoblastine" or "vincoleucoblastine" or "vincoleukoblastin" or "vinleucoblastine")<br>  Exact search                                                                                                                                                                                                                                                                                                                                                                                                                                                                                                                                                                                                                                                                                                                                                                                                                                                                                                                                                                                                                                                                                                                                                                                                                                      |
| # 7  | TS=("cisplatin" or "abiplatin" or "biocisplatinum" or "biocysplatinum" or "blastolem" or "briplatin" or "cddp ti" or "cis ddp" or "cis diamine dichloroplatinum" or "cis diaminechloroplatinum" or "cis diaminedichloroplatinum" or "cis diammine dichloroplatinum" or "cis diamminedichloroplatinum" or "cis dichlorodiammineplatinum" or "cis dichlorodiamine platinum" or "cis dichlorodiamine platinum" or "cis dichlorodiammineplatinum" or "cis platinum diamino dichloride" or "cis platinum" or "cis platinum diamine dichloride" or "cis platinum diaminedichloride" or "cis platinum diamino dichloride" or "cis platinum diaminochloride" or "cis platinum diaminodichloride" or "cis platinum diammine dichloride" or "cis platinum diamminedichloride" or "cisplatin liposomal" or "cisplatin therapeutic implant" or "cisplatin-ebewe" or "cisplatine" or "cisplatino" or "cisplatinum" or "cisplatyl" or "citoplatino" or "cytoplatin" or "cytosplat" or "diamine dichloroplatinum" or "diaminodichloroplatinum" or "diamminedichloroplatinum" or "dichlorodiamine platinum" or "dichlorodiammineplatinum" or "docistin" or "elvecis" or "kemoplat" or "lederplatin" or "lipoplatin" or "liposomal cisplatin" or "mpi 5010" or "mpi5010" or "neoplatin" or "niyaplat" or "nk 801" or "noveldexis" or "nsc 119875" or "platamine" or "platamine rtu" or "platiblastin" or "platidiam" or "platimine" or "platinex" or "platinil" or "platinol" or "platinol aq" or "platinoxan" or "platinum diamine dichloride" or "platinum diaminedichloride" or "platinum diaminodichloride" or "platinum diamminedichloride" or "platiran" or "platistil" or "platistin" or "platosin" or "randa" or "romcis" or "sicatem" or "spi 077" or "tecnoplatin")<br>  Exact search |
| # 6  | TS=("oxaliplatin" or "axiplatin" or "crisapla" or "croloxat" or "dacotin" or "dacplat" or "ebeoxal" or "elatofen" or "eloxatin" or "eloxatine" or "elplat" or "geneplatin" or "heloxatin" or "lipoxal" or "mbp 426" or "mbp426" or "medoxa" or "oplat" or "oxalatoplatinum" or "oxalatplatin" or "oxali" or "oxalip" or "oxaliplan" or "oxaliplatina" or "oxaliprol" or "oxaliquid" or "oxalisan" or "oxalisin" or "oxalizer" or "oxaltic" or "oxaltina" or "oxaplaml" or "oxaviatin" or "platox" or "plaxitin" or "rectoxal" or "riboxatin" or "rp 54780" or "rp54780" or "sinoxal" or "sr 96669" or "sr96669" or "transplastin" or "velminox" or "xaliplat" or "xoplan")<br>  Exact search                                                                                                                                                                                                                                                                                                                                                                                                                                                                                                                                                                                                                                                                                                                                                                                                                                                                                                                                                                                                                                                                                   |
| # 5  | TS=("docetaxel" or "daxotel" or "dexotel" or "docefrez" or "docetaxel accord" or "lit 976" or "lit976" or "n debenzoyl n tert butoxycarbonyl 10 deacetylaxol" or "n tert butoxycarbonyl 10 deacetyl n debenzoylaxol" or "nsc 628503" or "nsc628503" or "oncodocel" or "rp 56976" or "rp56976" or "taxespira" or "taxoter" or "taxotere" or "textot")<br>  Exact search                                                                                                                                                                                                                                                                                                                                                                                                                                                                                                                                                                                                                                                                                                                                                                                                                                                                                                                                                                                                                                                                                                                                                                                                                                                                                                                                                                                                         |
| # 4  | TS=("paclitaxel" or "abi 007" or "abi007" or "abraxane" or "albumin bound paclitaxel" or "anzatax" or "apealea" or "asotax" or "biotax" or "bms 181339" or "bms181339" or "bmy 45622" or "bmy45622" or "br                                                                                                                                                                                                                                                                                                                                                                                                                                                                                                                                                                                                                                                                                                                                                                                                                                                                                                                                                                                                                                                                                                                                                                                                                                                                                                                                                                                                                                                                                                                                                                     |

|   |                                                                                                                                                                                                                                                                                                                                                                                                                                                                                                                                                                                                                         |
|---|-------------------------------------------------------------------------------------------------------------------------------------------------------------------------------------------------------------------------------------------------------------------------------------------------------------------------------------------------------------------------------------------------------------------------------------------------------------------------------------------------------------------------------------------------------------------------------------------------------------------------|
|   | istaxol" or "britaxol" or "coroxane" or "dts 301" or "dts301" or "endotag-1" or "formoxol" or "genexol" or "genexol pm" or "hunxol" or "ifaxol" or "infinium" or "intaxe1" or "mbt 0206" or "mbt0206" or "medixel" or "mitotax" or "nab paclitaxel" or "nanoparticle al bumin bound paclitaxel" or "nsc 125973" or "nsc 673089" or "nsc125973" or "nsc673089" or "o as pac 100" or "oaspac100" or "oncogel" or "onxol" or "pacitaxel" or "paclitaxel nab" or "pacxel" or "padexol" or "parexel" or "paxceed" or "paxene" or "paxus" or "praxel" or "taxocris" or "taxol" or "taycovit" or "yewtaxan")<br>  Exact search |
| 3 | #2 OR #1<br>  Exact search                                                                                                                                                                                                                                                                                                                                                                                                                                                                                                                                                                                              |
| 2 | TS=(PNS NEAR/2 (disease* or disorder*))<br>  Exact search                                                                                                                                                                                                                                                                                                                                                                                                                                                                                                                                                               |
| 1 | TS=((peripheral NEAR/2 (nerve* or nervous) NEAR/2 (disease* or disorder*)) or "peripheral neuropath*")<br>  Exact search                                                                                                                                                                                                                                                                                                                                                                                                                                                                                                |

## 8. **EBSCOhost Research Databases - Cumulative Index to Nursing and Allied Health Literature (CINAHL with Full Text)** 1963 – searched June 04, 2020

Thursday, June 04, 2020 6:07:34 PM

| #   | Query                                                                              | Limiters/Expanders                                                     | Last Run Via                                                                                                    |
|-----|------------------------------------------------------------------------------------|------------------------------------------------------------------------|-----------------------------------------------------------------------------------------------------------------|
| S33 | S30 OR S32                                                                         | Expanders - Apply equivalent subjects<br>Search modes - Boolean/Phrase | Interface - EBSCOhost Research Databases<br>Search Screen - Advanced Search<br>Database - CINAHL with Full Text |
| S32 | S28 AND S31                                                                        | Expanders - Apply equivalent subjects<br>Search modes - Boolean/Phrase | Interface - EBSCOhost Research Databases<br>Search Screen - Advanced Search<br>Database - CINAHL with Full Text |
| S31 | TI (adult or adults or aged or elderly) or AB (adult or adults or aged or elderly) | Expanders - Apply equivalent subjects<br>Search modes - Boolean/Phrase | Interface - EBSCOhost Research Databases<br>Search Screen - Advanced Search<br>Database - CINAHL with Full Text |
| S30 | S28 NOT S29                                                                        | Expanders - Apply equivalent subjects<br>Search modes - Boolean/Phrase | Interface - EBSCOhost Research Databases<br>Search Screen - Advanced Search<br>Database - CINAHL with Full Text |
| S29 | TI (infan* OR newborn* OR new-born* OR                                             | Expanders - Apply                                                      | Interface - EBSCOhost                                                                                           |

|     |                                                                                                                                                                                                                                                                                                                                                                                                                                                                                                                                                                                                                                                                                                                                                                                                                                                                                 |                                                                              |                                                                                                                          |
|-----|---------------------------------------------------------------------------------------------------------------------------------------------------------------------------------------------------------------------------------------------------------------------------------------------------------------------------------------------------------------------------------------------------------------------------------------------------------------------------------------------------------------------------------------------------------------------------------------------------------------------------------------------------------------------------------------------------------------------------------------------------------------------------------------------------------------------------------------------------------------------------------|------------------------------------------------------------------------------|--------------------------------------------------------------------------------------------------------------------------|
|     | perinat* OR neonat* OR baby OR baby* OR babies OR toddler* OR minors OR minors* OR boy OR boys OR boyfriend OR boyhood OR girl* OR kid OR kids OR child OR child* OR children* OR schoolchild* OR schoolchild OR adolescen* OR juvenil* OR youth* OR teen* OR under*age* OR pubescen* OR pediatric* OR paediatric* OR peadiatric* OR prematur* OR preterm*OR school child OR "school child*" OR school OR school*) or AB (infan* OR newborn* OR new-born* OR perinat* OR neonat* OR baby OR baby* OR babies OR toddler* OR minors OR minors* OR boy OR boys OR boyfriend OR boyhood OR girl* OR kid OR kids OR child OR child* OR children* OR schoolchild* OR schoolchild OR adolescen* OR juvenil* OR youth* OR teen* OR under*age* OR pubescen* OR pediatric* OR paediatric* OR peadiatric* OR prematur* OR preterm*OR school child OR "school child*" OR school OR school*) | equivalent subjects<br>Search modes -<br>Boolean/Phrase                      | Research Databases<br>Search Screen - Advanced<br>Search<br>Database - CINAHL with Full<br>Text                          |
| S28 | S26 NOT S27                                                                                                                                                                                                                                                                                                                                                                                                                                                                                                                                                                                                                                                                                                                                                                                                                                                                     | Expanders - Apply<br>equivalent subjects<br>Search modes -<br>Boolean/Phrase | Interface - EBSCOhost<br>Research Databases<br>Search Screen - Advanced<br>Search<br>Database - CINAHL with Full<br>Text |
| S27 | TI (rat or rats or mouse or mice) or AB (rat or rats or mouse or mice)                                                                                                                                                                                                                                                                                                                                                                                                                                                                                                                                                                                                                                                                                                                                                                                                          | Expanders - Apply<br>equivalent subjects<br>Search modes -<br>Boolean/Phrase | Interface - EBSCOhost<br>Research Databases<br>Search Screen - Advanced<br>Search<br>Database - CINAHL with Full<br>Text |
| S26 | S24 NOT S25                                                                                                                                                                                                                                                                                                                                                                                                                                                                                                                                                                                                                                                                                                                                                                                                                                                                     | Expanders - Apply<br>equivalent subjects<br>Search modes -<br>Boolean/Phrase | Interface - EBSCOhost<br>Research Databases<br>Search Screen - Advanced<br>Search<br>Database - CINAHL with Full<br>Text |
| S25 | TI (case N1 (report* or series)) or AB (case N1 (report* or series))                                                                                                                                                                                                                                                                                                                                                                                                                                                                                                                                                                                                                                                                                                                                                                                                            | Expanders - Apply<br>equivalent subjects<br>Search modes -<br>Boolean/Phrase | Interface - EBSCOhost<br>Research Databases<br>Search Screen - Advanced<br>Search<br>Database - CINAHL with Full<br>Text |
| S24 | S11 AND S23                                                                                                                                                                                                                                                                                                                                                                                                                                                                                                                                                                                                                                                                                                                                                                                                                                                                     | Expanders - Apply<br>equivalent subjects<br>Search modes -<br>Boolean/Phrase | Interface - EBSCOhost<br>Research Databases<br>Search Screen - Advanced<br>Search<br>Database - CINAHL with Full<br>Text |

|     |                                                                                                                                                                                                                                                                                                                                                                                                                                                                                                                                                                                                                                                                                                                                                                                                                                                                                                                                                                                                                                                                                                                                                                                                                                                                                                                                                                                                                                                                                                                                                         |                                                                        |                                                                                                                    |
|-----|---------------------------------------------------------------------------------------------------------------------------------------------------------------------------------------------------------------------------------------------------------------------------------------------------------------------------------------------------------------------------------------------------------------------------------------------------------------------------------------------------------------------------------------------------------------------------------------------------------------------------------------------------------------------------------------------------------------------------------------------------------------------------------------------------------------------------------------------------------------------------------------------------------------------------------------------------------------------------------------------------------------------------------------------------------------------------------------------------------------------------------------------------------------------------------------------------------------------------------------------------------------------------------------------------------------------------------------------------------------------------------------------------------------------------------------------------------------------------------------------------------------------------------------------------------|------------------------------------------------------------------------|--------------------------------------------------------------------------------------------------------------------|
| S23 | S18 OR S19 OR S20 OR S21 OR S22                                                                                                                                                                                                                                                                                                                                                                                                                                                                                                                                                                                                                                                                                                                                                                                                                                                                                                                                                                                                                                                                                                                                                                                                                                                                                                                                                                                                                                                                                                                         | Expanders - Apply equivalent subjects<br>Search modes - Boolean/Phrase | Interface - EBSCOhost<br>Research Databases<br>Search Screen - Advanced Search<br>Database - CINAHL with Full Text |
| S22 | <p>TI (beriberi or pellagra or scurvy or rickets or osteomalacia or hypocalcem* or hypo-calcem* or hypercalcem* or hyper-calcem* or hypocalcaem* or hypo-calcaem* or hypercalcaem* or hyper-calcaem* or hypocalciur* or hypo-calciur* or hypercalciur* or hyper-calciur* or hypomagnesium* or hypo-magnesium* or hypermagnesium* or hyper-magnesium* or hypomagnesaem* or hypo-magnesaem* or hypermagnesaem* or hyper-magnesaem* or hypoalbuminem* or hypo-albuminem* or hyperalbuminem* or hyper-albuminem* or hypoalbuminaem* or hypo-albuminaem* or hyperalbuminaem* or hyper-albuminaem* or hypokalem* or hypo-kalem* or hyperkalem* or hyper-kalem* or hypokalaem* or hypo-kalaem* or hyperkalaem* or hyper-kalaem* or hyperhomocysteinemia or hyperhomocysteinemia) or AB (beriberi or pellagra or scurvy or rickets or osteomalacia or hypocalcem* or hypo-calcem* or hypercalcem* or hyper-calcem* or hypocalcaem* or hypo-calcaem* or hypercalcaem* or hyper-calcaem* or hypocalciur* or hypo-calciur* or hypercalciur* or hyper-calciur* or hypomagnesium* or hypo-magnesium* or hypermagnesium* or hyper-magnesium* or hypomagnesaem* or hypo-magnesaem* or hypermagnesaem* or hyper-magnesaem* or hypoalbuminem* or hypo-albuminem* or hyperalbuminem* or hyper-albuminem* or hypoalbuminaem* or hypo-albuminaem* or hyperalbuminaem* or hyper-albuminaem* or hypokalem* or hypo-kalem* or hyperkalem* or hyper-kalem* or hypokalaem* or hypo-kalaem* or hyperkalaem* or hyper-kalaem* or hyperhomocysteinemia or hyperhomocysteinemia)</p> | Expanders - Apply equivalent subjects<br>Search modes - Boolean/Phrase | Interface - EBSCOhost<br>Research Databases<br>Search Screen - Advanced Search<br>Database - CINAHL with Full Text |
| S21 | <p>TI (undernutrition* or malnutrition* or avitaminosis or ((nutrition* or mineral* or metabolic or nutrient* or micronutrient* or micro-nutrient*)) N2 (deficien* or diseases or disorder*)) or AB (undernutrition* or malnutrition* or avitaminosis or ((nutrition* or mineral* or metabolic or nutrient* or micronutrient* or micro-nutrient*)) N2 (deficien* or diseases or disorder*)) or AB</p>                                                                                                                                                                                                                                                                                                                                                                                                                                                                                                                                                                                                                                                                                                                                                                                                                                                                                                                                                                                                                                                                                                                                                   | Expanders - Apply equivalent subjects<br>Search modes - Boolean/Phrase | Interface - EBSCOhost<br>Research Databases<br>Search Screen - Advanced Search<br>Database - CINAHL with Full Text |

|     |                                                                                                                                                                                                                                                                                                                                                                                                                                                                                                                                                                                                                                                                                                                                             |                                                                              |                                                                                                                          |
|-----|---------------------------------------------------------------------------------------------------------------------------------------------------------------------------------------------------------------------------------------------------------------------------------------------------------------------------------------------------------------------------------------------------------------------------------------------------------------------------------------------------------------------------------------------------------------------------------------------------------------------------------------------------------------------------------------------------------------------------------------------|------------------------------------------------------------------------------|--------------------------------------------------------------------------------------------------------------------------|
|     | (undernutrition* or malnutrition* or avitaminosis or ((nutrition* or mineral* or metabolic or nutrient* or micronutrient* or micro-nutrient*) N2 (deficien* or diseases or disorder*)))                                                                                                                                                                                                                                                                                                                                                                                                                                                                                                                                                     |                                                                              |                                                                                                                          |
| S20 | (MH "Nutritional and Metabolic Diseases+")<br>NOT (MH "Obesity+")                                                                                                                                                                                                                                                                                                                                                                                                                                                                                                                                                                                                                                                                           | Expanders - Apply<br>equivalent subjects<br>Search modes -<br>Boolean/Phrase | Interface - EBSCOhost<br>Research Databases<br>Search Screen - Advanced<br>Search<br>Database - CINAHL with Full<br>Text |
| S19 | TI (((("complete blood" or "red blood cell" or erythrocyte or RBC or iron or reticulocyte) N1 (count or indices)) or "CBC" or "hemogram" or ((("coronary risk" or lipid or cholesterol or prothrombin or prothrombine or protrombin) N1 (panel or test)) or Thrombotest or "Fe Tests") or AB (((("complete blood" or "red blood cell" or erythrocyte or RBC or iron or reticulocyte) N1 (count or indices)) or "CBC" or "hemogram" or ((("coronary risk" or lipid or cholesterol or prothrombin or prothrombine or protrombin) N1 (panel or test)) or Thrombotest or "Fe Tests")                                                                                                                                                            | Expanders - Apply<br>equivalent subjects<br>Search modes -<br>Boolean/Phrase | Interface - EBSCOhost<br>Research Databases<br>Search Screen - Advanced<br>Search<br>Database - CINAHL with Full<br>Text |
| S18 | S14 AND S17                                                                                                                                                                                                                                                                                                                                                                                                                                                                                                                                                                                                                                                                                                                                 | Expanders - Apply<br>equivalent subjects<br>Search modes -<br>Boolean/Phrase | Interface - EBSCOhost<br>Research Databases<br>Search Screen - Advanced<br>Search<br>Database - CINAHL with Full<br>Text |
| S17 | S15 OR S16                                                                                                                                                                                                                                                                                                                                                                                                                                                                                                                                                                                                                                                                                                                                  | Expanders - Apply<br>equivalent subjects<br>Search modes -<br>Boolean/Phrase | Interface - EBSCOhost<br>Research Databases<br>Search Screen - Advanced<br>Search<br>Database - CINAHL with Full<br>Text |
| S16 | TI (hemoglobin or hemoglobins or haemoglobin or hemoglobine or haemoglobine or haemoglobins or hemoglobulin or hematocrit or ferrohaemoglobin or ferrohemoglobin or erythrocytes or eryhem or albumin or albumen or prealbumin or pre-albumin or total-protein or leptin or globulin or globulins or polyglobulin or poly-globulin or choline or bursine or fagine or vidine or thiamin or thiamine or anemi* or anaemi* or aneurin or riboflavin or riboflavine or "flavin mononucleotide" or "flavin-adenine dinucleotide" or niacin or niacinamide or enduramide or nicobion or nicotinamide or nicotinsaureamid or papulex or "pantothenic acid" or "calcium pantothenate" or dextol or "zinc pantothenate" or "pyridoxal phosphate" or | Expanders - Apply<br>equivalent subjects<br>Search modes -<br>Boolean/Phrase | Interface - EBSCOhost<br>Research Databases<br>Search Screen - Advanced<br>Search<br>Database - CINAHL with Full<br>Text |

|     |                                                                                                                                                                                                                                                                                                                                                                                                                                                                                                                                                                                                                                                                                                                                                                                                                                                                                                                                                                                                                                                                                                                                                                                                                                                                                                                                                                                                                                                                                                                                                                                                                                                                                                                                                                                                                                                                                                                                                                                                                                                                                                                                                                                                                                                            |                                                                                |                                                                                         |
|-----|------------------------------------------------------------------------------------------------------------------------------------------------------------------------------------------------------------------------------------------------------------------------------------------------------------------------------------------------------------------------------------------------------------------------------------------------------------------------------------------------------------------------------------------------------------------------------------------------------------------------------------------------------------------------------------------------------------------------------------------------------------------------------------------------------------------------------------------------------------------------------------------------------------------------------------------------------------------------------------------------------------------------------------------------------------------------------------------------------------------------------------------------------------------------------------------------------------------------------------------------------------------------------------------------------------------------------------------------------------------------------------------------------------------------------------------------------------------------------------------------------------------------------------------------------------------------------------------------------------------------------------------------------------------------------------------------------------------------------------------------------------------------------------------------------------------------------------------------------------------------------------------------------------------------------------------------------------------------------------------------------------------------------------------------------------------------------------------------------------------------------------------------------------------------------------------------------------------------------------------------------------|--------------------------------------------------------------------------------|-----------------------------------------------------------------------------------------|
|     | <p>"pyridoxal 5-phosphate" or "pyridoxal-P" or biotin or folate or "folic acid" or folacin or folvite or folvit or "pteroylglutamic acid" or cobalamin or cobalamins or cyanocobalamin or eritron or "B1" or "B2" or "B3" or "B5" or "B6" or "B7" or "B9" or "B12" or (B N ("1" or "2" or "3" or "5" or "6" or "7" or "9" or "12")) or "methylmalonic acid" or "methyl malonate" or "methyl malonic acid" or methylmalonate or retinol or carotene or "Aquasol A" or phytomenadione or menaquinone or menadione or calcium or chloride or magnesium or phosphorus or romag or potassium or kalium or sodium or chromium or copper or fluoride or iodine or iron or "Fe" or "Fe+++" or ferro or ferrum or manganese or molybdenum or selenium or zinc) or AB (hemoglobin or hemoglobins or haemoglobin or hemoglobine or haemoglobine or haemoglobins or hemoglobulin or hematocrit or ferrohaemoglobin or ferrohemoglobin or erythrocytes or eryhem or albumin or albumen or prealbumin or pre-albumin or total-protein or leptin or globulin or globulins or polyglobulin or poly-globulin or choline or bursine or fagine or vidine or thiamin or thiamine or anemi* or anaemi* or aneurin or riboflavin or riboflavine or "flavin mononucleotide" or "flavin-adenine dinucleotide" or niacin or niacinamide or enduramide or nicobion or nicotinamide or nicotinsaureamid or papulex or "pantothenic acid" or "calcium pantothenate" or dexol or "zinc pantothenate" or "pyridoxal phosphate" or "pyridoxal 5-phosphate" or "pyridoxal-P" or biotin or folate or "folic acid" or folacin or folvite or folvit or "pteroylglutamic acid" or cobalamin or cobalamins or cyanocobalamin or eritron or "B1" or "B2" or "B3" or "B5" or "B6" or "B7" or "B9" or "B12" or (B N ("1" or "2" or "3" or "5" or "6" or "7" or "9" or "12")) or "methylmalonic acid" or "methyl malonate" or "methyl malonic acid" or methylmalonate or retinol or carotene or "Aquasol A" or phytomenadione or menaquinone or menadione or calcium or chloride or magnesium or phosphorus or romag or potassium or kalium or sodium or chromium or copper or fluoride or iodine or iron or "Fe" or "Fe+++" or ferro or ferrum or manganese or molybdenum or selenium or zinc)</p> |                                                                                |                                                                                         |
| S15 | <p>(MH "Hemoglobins") or (MH "Anemia") or (MH "Homocysteine") or (MH "Nutrients+") or (MH "Minerals+") or (MH "Vitamin A+") or (MH "Riboflavin") or (MH "Niacin") or (MH</p>                                                                                                                                                                                                                                                                                                                                                                                                                                                                                                                                                                                                                                                                                                                                                                                                                                                                                                                                                                                                                                                                                                                                                                                                                                                                                                                                                                                                                                                                                                                                                                                                                                                                                                                                                                                                                                                                                                                                                                                                                                                                               | <p>Expanders - Apply equivalent subjects<br/>Search modes - Boolean/Phrase</p> | <p>Interface - EBSCOhost<br/>Research Databases<br/>Search Screen - Advanced Search</p> |

|     |                                                                                                                                                                                                                                                                                                                                                                                                                                                                                                                                                                                             |                                                                        |                                                                                                                    |
|-----|---------------------------------------------------------------------------------------------------------------------------------------------------------------------------------------------------------------------------------------------------------------------------------------------------------------------------------------------------------------------------------------------------------------------------------------------------------------------------------------------------------------------------------------------------------------------------------------------|------------------------------------------------------------------------|--------------------------------------------------------------------------------------------------------------------|
|     | "Vitamin B Complex+") or (MH "Ascorbic Acid") or (MH "Vitamin D") or (MH "Vitamin E") or (MH "Vitamin K") or (MH "Prothrombin Time") or (MH "Calcium") or (MH "Magnesium") or (MH "Potassium") or (MH "Sodium, Dietary+") or (MH "Sodium") or (MH "Chromium") or (MH "Fluorides") or (MH "Iodine") or (MH "Iron") or (MH "Manganese") or (MH "Molybdenum") or (MH "Selenium") or (MH "Zinc")                                                                                                                                                                                                |                                                                        | Database - CINAHL with Full Text                                                                                   |
| S14 | S12 OR S13                                                                                                                                                                                                                                                                                                                                                                                                                                                                                                                                                                                  | Expanders - Apply equivalent subjects<br>Search modes - Boolean/Phrase | Interface - EBSCOhost<br>Research Databases<br>Search Screen - Advanced Search<br>Database - CINAHL with Full Text |
| S13 | TI ((laboratory N2 (marker or markers or values or test* or technique* or service or services or diagnos* or examin* or evaluat*)) or ("lab test" or "lab tests" or "lab result" or "lab results" or "lab value" or "lab values" or deficien*)) or AB ((laboratory N2 (marker or markers or values or test* or technique* or service or services or diagnos* or examin* or evaluat*)) or ("lab test" or "lab tests" or "lab result" or "lab results" or "lab value" or "lab values" or deficien*))                                                                                          | Expanders - Apply equivalent subjects<br>Search modes - Boolean/Phrase | Interface - EBSCOhost<br>Research Databases<br>Search Screen - Advanced Search<br>Database - CINAHL with Full Text |
| S12 | (MH "Clinical Laboratories+")                                                                                                                                                                                                                                                                                                                                                                                                                                                                                                                                                               | Expanders - Apply equivalent subjects<br>Search modes - Boolean/Phrase | Interface - EBSCOhost<br>Research Databases<br>Search Screen - Advanced Search<br>Database - CINAHL with Full Text |
| S11 | S3 OR S9 OR S10                                                                                                                                                                                                                                                                                                                                                                                                                                                                                                                                                                             | Expanders - Apply equivalent subjects<br>Search modes - Boolean/Phrase | Interface - EBSCOhost<br>Research Databases<br>Search Screen - Advanced Search<br>Database - CINAHL with Full Text |
| S10 | TI ((chemo* or antineoplas* or anti-neoplas* or anticancer* or anti-cancer* or anticarcino* or anti-carcino* or antitumor or anti-tumor or antitumour or anti-tumour or carcinochemo* or carcinostatic or "tumor inhibitor" or "tumour inhibitor") N3 (neuropath* or neuralgia or neurotox* or mononeuropath* or mono-neuropath* or polyneuropath* or poly-neuropath*)) or AB ((chemo* or antineoplas* or anti-neoplas* or anticancer* or anti-cancer* or anticarcino* or anti-carcino* or antitumor or anti-tumor or antitumour or anti-tumour or carcinochemo* or carcinostatic or "tumor | Expanders - Apply equivalent subjects<br>Search modes - Boolean/Phrase | Interface - EBSCOhost<br>Research Databases<br>Search Screen - Advanced Search<br>Database - CINAHL with Full Text |



|    |                                                                                                                                                                                                                                                                                                                                                                                                                                                                                                                                                                                                                         |                                                                        |                                                                                                                    |
|----|-------------------------------------------------------------------------------------------------------------------------------------------------------------------------------------------------------------------------------------------------------------------------------------------------------------------------------------------------------------------------------------------------------------------------------------------------------------------------------------------------------------------------------------------------------------------------------------------------------------------------|------------------------------------------------------------------------|--------------------------------------------------------------------------------------------------------------------|
|    | inhibitor" or "tumour inhibitor") N3 (neuropath* or neuralgia or neurotox* or mononeuropath* or mono-neuropath* or polyneuropath* or poly-neuropath*))                                                                                                                                                                                                                                                                                                                                                                                                                                                                  |                                                                        |                                                                                                                    |
| S9 | S7 AND S8                                                                                                                                                                                                                                                                                                                                                                                                                                                                                                                                                                                                               | Expanders - Apply equivalent subjects<br>Search modes - Boolean/Phrase | Interface - EBSCOhost<br>Research Databases<br>Search Screen - Advanced Search<br>Database - CINAHL with Full Text |
| S8 | (MH "Antineoplastic Agents+") or (MH "Chemotherapy, Adjuvant+") or TI ((anticancer* or anti-cancer* or anticarcino* or anti-carcino* or antitumor or anti-tumor or antitumour* or anti-tumour* or carcinostatic) N2 (therap* or agent or agents or treatment* or management*)) or carcinochemo* or "tumor inhibitor" or "tumour inhibitor") or AB ((anticancer* or anti-cancer* or anticarcino* or anti-carcino* or antitumor or anti-tumor or antitumour* or anti-tumour* or carcinostatic) N2 (therap* or agent or agents or treatment* or management*)) or carcinochemo* or "tumor inhibitor" or "tumour inhibitor") | Expanders - Apply equivalent subjects<br>Search modes - Boolean/Phrase | Interface - EBSCOhost<br>Research Databases<br>Search Screen - Advanced Search<br>Database - CINAHL with Full Text |
| S7 | S4 OR S5 OR S6                                                                                                                                                                                                                                                                                                                                                                                                                                                                                                                                                                                                          | Expanders - Apply equivalent subjects<br>Search modes - Boolean/Phrase | Interface - EBSCOhost<br>Research Databases<br>Search Screen - Advanced Search<br>Database - CINAHL with Full Text |
| S6 | TI (PNS N2 (disease* or disorder*)) or AB (PNS N2 (disease* or disorder*))                                                                                                                                                                                                                                                                                                                                                                                                                                                                                                                                              | Expanders - Apply equivalent subjects<br>Search modes - Boolean/Phrase | Interface - EBSCOhost<br>Research Databases<br>Search Screen - Advanced Search<br>Database - CINAHL with Full Text |
| S5 | TI ((peripheral N2 (nerve* or nervous) N2 (disease* or disorder*)) or "peripheral neuropath*") or AB ((peripheral N2 (nerve* or nervous) N2 (disease* or disorder*)) or "peripheral neuropath*")                                                                                                                                                                                                                                                                                                                                                                                                                        | Expanders - Apply equivalent subjects<br>Search modes - Boolean/Phrase | Interface - EBSCOhost<br>Research Databases<br>Search Screen - Advanced Search<br>Database - CINAHL with Full Text |
| S4 | (MH "Peripheral Nervous System Diseases+")                                                                                                                                                                                                                                                                                                                                                                                                                                                                                                                                                                              | Expanders - Apply equivalent subjects<br>Search modes - Boolean/Phrase | Interface - EBSCOhost<br>Research Databases<br>Search Screen - Advanced Search<br>Database - CINAHL with Full Text |
| S3 | S1 OR S2                                                                                                                                                                                                                                                                                                                                                                                                                                                                                                                                                                                                                | Expanders - Apply                                                      | Interface - EBSCOhost                                                                                              |

|    |                                                  |                                                                              |                                                                                                                          |
|----|--------------------------------------------------|------------------------------------------------------------------------------|--------------------------------------------------------------------------------------------------------------------------|
|    |                                                  | equivalent subjects<br>Search modes -<br>Boolean/Phrase                      | Research Databases<br>Search Screen - Advanced<br>Search<br>Database - CINAHL with Full<br>Text                          |
| S2 | (MH "Neuralgia+/CI")                             | Expanders - Apply<br>equivalent subjects<br>Search modes -<br>Boolean/Phrase | Interface - EBSCOhost<br>Research Databases<br>Search Screen - Advanced<br>Search<br>Database - CINAHL with Full<br>Text |
| S1 | (MH "Peripheral Nervous System<br>Diseases+/CI") | Expanders - Apply<br>equivalent subjects<br>Search modes -<br>Boolean/Phrase | Interface - EBSCOhost<br>Research Databases<br>Search Screen - Advanced<br>Search<br>Database - CINAHL with Full<br>Text |

*Update: **EBSCOhost Research Databases - Cumulative Index to Nursing and Allied Health Literature (CINAHL with Full Text)** 1963 – searched December 08, 2021*

*Wednesday, December 08, 2021 10:56:20 PM*

| #   | Query                                                                                                                                                                                                                                                                                                                                                                    | Limiters/Expanders                                                                                                                  | Last Run Via                                                                                                             |
|-----|--------------------------------------------------------------------------------------------------------------------------------------------------------------------------------------------------------------------------------------------------------------------------------------------------------------------------------------------------------------------------|-------------------------------------------------------------------------------------------------------------------------------------|--------------------------------------------------------------------------------------------------------------------------|
| S25 | S11 AND S23                                                                                                                                                                                                                                                                                                                                                              | Limiters - Published<br>Date: 20200101-<br>20301231<br>Expanders - Apply<br>equivalent subjects<br>Search modes -<br>Boolean/Phrase | Interface - EBSCOhost<br>Research Databases<br>Search Screen - Basic Search<br>Database - CINAHL with Full<br>Text       |
| S24 | S11 AND S23                                                                                                                                                                                                                                                                                                                                                              | Expanders - Apply<br>equivalent subjects<br>Search modes -<br>Boolean/Phrase                                                        | Interface - EBSCOhost<br>Research Databases<br>Search Screen - Advanced<br>Search<br>Database - CINAHL with Full<br>Text |
| S23 | S18 OR S19 OR S20 OR S21 OR S22                                                                                                                                                                                                                                                                                                                                          | Expanders - Apply<br>equivalent subjects<br>Search modes -<br>Boolean/Phrase                                                        | Interface - EBSCOhost<br>Research Databases<br>Search Screen - Advanced<br>Search<br>Database - CINAHL with Full<br>Text |
| S22 | TI (beriberi or pellagra or scurvy or rickets or osteomalacia or hypocalcem* or hypo-calcem* or hypercalcem* or hyper-calcem* or hypocalcaem* or hypo-calcaem* or hypercalcaem* or hyper-calcaem* or hypocalciur* or hypo-calciur* or hypercalciur* or hyper-calciur* or hypomagnesem* or hypo-magnesem* or hypermagnesem* or hyper-magnesem* or hypomagnesaem* or hypo- | Expanders - Apply<br>equivalent subjects<br>Search modes -<br>Boolean/Phrase                                                        | Interface - EBSCOhost<br>Research Databases<br>Search Screen - Advanced<br>Search<br>Database - CINAHL with Full<br>Text |

|     |                                                                                                                                                                                                                                                                                                                                                                                                                                                                                                                                                                                                                                                                                                                                                                                                                                                                                                                                                                                                                                                                                                                                                            |                                                                                |                                                                                                                              |
|-----|------------------------------------------------------------------------------------------------------------------------------------------------------------------------------------------------------------------------------------------------------------------------------------------------------------------------------------------------------------------------------------------------------------------------------------------------------------------------------------------------------------------------------------------------------------------------------------------------------------------------------------------------------------------------------------------------------------------------------------------------------------------------------------------------------------------------------------------------------------------------------------------------------------------------------------------------------------------------------------------------------------------------------------------------------------------------------------------------------------------------------------------------------------|--------------------------------------------------------------------------------|------------------------------------------------------------------------------------------------------------------------------|
|     | <p>magnesaem* or hypermagnesaem* or hypermagnesaem* or hypoalbuminem* or hypoalbuminem* or hyperalbuminem* or hyperalbuminem* or hypoalbuminaem* or hypoalbuminaem* or hyperalbuminaem* or hyperalbuminaem* or hypokalem* or hypo-kalem* or hyperkalem* or hyper-kalem* or hypokalaem* or hypo-kalaem* or hyperkalaem* or hyper-kalaem* or hyperhomocysteinemia or hyperhomocysteinemia) or AB (beriberi or pellagra or scurvy or rickets or osteomalacia or hypocalcem* or hypo-calcem* or hypercalcem* or hyper-calcem* or hypocalcaem* or hypo-calcaem* or hypercalcaem* or hyper-calcaem* or hypocalciur* or hypo-calciur* or hypercalciur* or hyper-calciur* or hypomagnesem* or hypomagnesem* or hypermagnesem* or hypermagnesem* or hypomagnesaem* or hypomagnesaem* or hypermagnesaem* or hypermagnesaem* or hypoalbuminem* or hypoalbuminem* or hyperalbuminem* or hyperalbuminem* or hypoalbuminaem* or hypoalbuminaem* or hyperalbuminaem* or hyperalbuminaem* or hypokalem* or hypo-kalem* or hyperkalem* or hyper-kalem* or hypokalaem* or hypo-kalaem* or hyperkalaem* or hyper-kalaem* or hyperhomocysteinemia or hyperhomocysteinemia)</p> |                                                                                |                                                                                                                              |
| S21 | <p>TI (undernutrition* or malnutrition* or avitaminosis or ((nutrition* or mineral* or metabolic or nutrient* or micronutrient* or micro-nutrient*)) N2 (deficien* or diseases or disorder*)) or AB (undernutrition* or malnutrition* or avitaminosis or ((nutrition* or mineral* or metabolic or nutrient* or micronutrient* or micro-nutrient*)) N2 (deficien* or diseases or disorder*)) or AB (undernutrition* or malnutrition* or avitaminosis or ((nutrition* or mineral* or metabolic or nutrient* or micronutrient* or micro-nutrient*)) N2 (deficien* or diseases or disorder*))</p>                                                                                                                                                                                                                                                                                                                                                                                                                                                                                                                                                              | <p>Expanders - Apply equivalent subjects<br/>Search modes - Boolean/Phrase</p> | <p>Interface - EBSCOhost<br/>Research Databases<br/>Search Screen - Advanced Search<br/>Database - CINAHL with Full Text</p> |
| S20 | <p>(MH "Nutritional and Metabolic Diseases+")<br/>NOT (MH "Obesity+")</p>                                                                                                                                                                                                                                                                                                                                                                                                                                                                                                                                                                                                                                                                                                                                                                                                                                                                                                                                                                                                                                                                                  | <p>Expanders - Apply equivalent subjects<br/>Search modes - Boolean/Phrase</p> | <p>Interface - EBSCOhost<br/>Research Databases<br/>Search Screen - Advanced Search<br/>Database - CINAHL with Full Text</p> |
| S19 | <p>TI (((("complete blood" or "red blood cell" or erythrocyte or RBC or iron or reticulocyte) N1 (count or indices)) or "CBC" or "hemogram" or ("coronary risk" or lipid or cholesterol or prothrombin or prothrombine or protrombin)</p>                                                                                                                                                                                                                                                                                                                                                                                                                                                                                                                                                                                                                                                                                                                                                                                                                                                                                                                  | <p>Expanders - Apply equivalent subjects<br/>Search modes - Boolean/Phrase</p> | <p>Interface - EBSCOhost<br/>Research Databases<br/>Search Screen - Advanced Search<br/>Database - CINAHL with Full</p>      |

|     |                                                                                                                                                                                                                                                                                                                                                                                                                                                                                                                                                                                                                                                                                                                                                                                                                                                                                                                                                                                                                                                                                                                                                                                                                                                                                                                                                                                                                                                                                                                                                                                                                               |                                                                        |                                                                                                                    |
|-----|-------------------------------------------------------------------------------------------------------------------------------------------------------------------------------------------------------------------------------------------------------------------------------------------------------------------------------------------------------------------------------------------------------------------------------------------------------------------------------------------------------------------------------------------------------------------------------------------------------------------------------------------------------------------------------------------------------------------------------------------------------------------------------------------------------------------------------------------------------------------------------------------------------------------------------------------------------------------------------------------------------------------------------------------------------------------------------------------------------------------------------------------------------------------------------------------------------------------------------------------------------------------------------------------------------------------------------------------------------------------------------------------------------------------------------------------------------------------------------------------------------------------------------------------------------------------------------------------------------------------------------|------------------------------------------------------------------------|--------------------------------------------------------------------------------------------------------------------|
|     | N1 (panel or test)) or Thrombotest or "Fe Tests") or AB (((("complete blood" or "red blood cell" or erythrocyte or RBC or iron or reticulocyte) N1 (count or indices)) or "CBC" or "hemogram" or ((("coronary risk" or lipid or cholesterol or prothrombin or prothrombine or protrombin) N1 (panel or test)) or Thrombotest or "Fe Tests"))                                                                                                                                                                                                                                                                                                                                                                                                                                                                                                                                                                                                                                                                                                                                                                                                                                                                                                                                                                                                                                                                                                                                                                                                                                                                                  |                                                                        | Text                                                                                                               |
| S18 | S14 AND S17                                                                                                                                                                                                                                                                                                                                                                                                                                                                                                                                                                                                                                                                                                                                                                                                                                                                                                                                                                                                                                                                                                                                                                                                                                                                                                                                                                                                                                                                                                                                                                                                                   | Expanders - Apply equivalent subjects<br>Search modes - Boolean/Phrase | Interface - EBSCOhost<br>Research Databases<br>Search Screen - Advanced Search<br>Database - CINAHL with Full Text |
| S17 | S15 OR S16                                                                                                                                                                                                                                                                                                                                                                                                                                                                                                                                                                                                                                                                                                                                                                                                                                                                                                                                                                                                                                                                                                                                                                                                                                                                                                                                                                                                                                                                                                                                                                                                                    | Expanders - Apply equivalent subjects<br>Search modes - Boolean/Phrase | Interface - EBSCOhost<br>Research Databases<br>Search Screen - Advanced Search<br>Database - CINAHL with Full Text |
| S16 | TI (hemoglobin or hemoglobins or haemoglobin or hemoglobine or haemoglobine or haemoglobins or hemoglobulin or hematocrit or ferrohaemoglobin or ferrohemoglobin or erythrocytes or eryhem or albumin or albumen or prealbumin or pre-albumin or total-protein or leptin or globulin or globulins or polyglobulin or poly-globulin or choline or bursine or fagine or vidine or thiamin or thiamine or anemi* or anaemi* or aneurin or riboflavin or riboflavine or "flavin mononucleotide" or "flavin-adenine dinucleotide" or niacin or niacinamide or enduramide or nicobion or nicotinamide or nicotinsaureamid or papulex or "pantothenic acid" or "calcium pantothenate" or dexol or "zinc pantothenate" or "pyridoxal phosphate" or "pyridoxal 5-phosphate" or "pyridoxal-P" or biotin or folate or "folic acid" or folacin or folvite or folvit or "pteroylglutamic acid" or cobalamin or cobalamins or cyanocobalamin or eritron or "B1" or "B2" or "B3" or "B5" or "B6" or "B7" or "B9" or "B12" or (B N ("1" or "2" or "3" or "5" or "6" or "7" or "9" or "12")) or "methylmalonic acid" or "methyl malonate" or "methyl malonic acid" or methylmalonate or retinol or carotene or "Aquasol A" or phytomenadione or menaquinone or menadione or calcium or chloride or magnesium or phosphorus or romag or potassium or kalium or sodium or chromium or copper or fluoride or iodine or iron or "Fe" or "Fe+++" or ferro or ferrum or manganese or molybdenum or selenium or zinc) or AB (hemoglobin or hemoglobins or haemoglobin or hemoglobine or haemoglobine or haemoglobins or hemoglobulin or hematocrit or | Expanders - Apply equivalent subjects<br>Search modes - Boolean/Phrase | Interface - EBSCOhost<br>Research Databases<br>Search Screen - Advanced Search<br>Database - CINAHL with Full Text |

|     |                                                                                                                                                                                                                                                                                                                                                                                                                                                                                                                                                                                                                                                                                                                                                                                                                                                                                                                                                                                                                                                                                                                                                                                                                                                                                                                                                                  |                                                                        |                                                                                                                    |
|-----|------------------------------------------------------------------------------------------------------------------------------------------------------------------------------------------------------------------------------------------------------------------------------------------------------------------------------------------------------------------------------------------------------------------------------------------------------------------------------------------------------------------------------------------------------------------------------------------------------------------------------------------------------------------------------------------------------------------------------------------------------------------------------------------------------------------------------------------------------------------------------------------------------------------------------------------------------------------------------------------------------------------------------------------------------------------------------------------------------------------------------------------------------------------------------------------------------------------------------------------------------------------------------------------------------------------------------------------------------------------|------------------------------------------------------------------------|--------------------------------------------------------------------------------------------------------------------|
|     | ferrohaemoglobin or ferrohemoglobin or erythrocytes or eryhem or albumin or albumen or prealbumin or pre-albumin or total-protein or leptin or globulin or globulins or polyglobulin or poly-globulin or choline or bursine or fagine or vidine or thiamin or thiamine or anemi* or anaemi* or aneurin or riboflavin or riboflavine or "flavin mononucleotide" or "flavin-adenine dinucleotide" or niacin or niacinamide or enduramide or nicobion or nicotinamide or nicotinsaureamid or papulex or "pantothenic acid" or "calcium pantothenate" or dexol or "zinc pantothenate" or "pyridoxal phosphate" or "pyridoxal 5-phosphate" or "pyridoxal-P" or biotin or folate or "folic acid" or folacin or folvite or folvit or "pteroylglutamic acid" or cobalamin or cobalamins or cyanocobalamin or eritron or "B1" or "B2" or "B3" or "B5" or "B6" or "B7" or "B9" or "B12" or (B N ("1" or "2" or "3" or "5" or "6" or "7" or "9" or "12")) or "methylmalonic acid" or "methyl malonate" or "methyl malonic acid" or methylmalonate or retinol or carotene or "Aquasol A" or phytomenadione or menaquinone or menadione or calcium or chloride or magnesium or phosphorus or romag or potassium or kalium or sodium or chromium or copper or fluoride or iodine or iron or "Fe" or "Fe+++" or ferro or ferrum or manganese or molybdenum or selenium or zinc) |                                                                        |                                                                                                                    |
| S15 | (MH "Hemoglobins") or (MH "Anemia") or (MH "Homocysteine") or (MH "Nutrients+") or (MH "Minerals+") or (MH "Vitamin A+") or (MH "Riboflavin") or (MH "Niacin") or (MH "Vitamin B Complex+") or (MH "Ascorbic Acid") or (MH "Vitamin D") or (MH "Vitamin E") or (MH "Vitamin K") or (MH "Prothrombin Time") or (MH "Calcium") or (MH "Magnesium") or (MH "Potassium") or (MH "Sodium, Dietary+") or (MH "Sodium") or (MH "Chromium") or (MH "Fluorides") or (MH "Iodine") or (MH "Iron") or (MH "Manganese") or (MH "Molybdenum") or (MH "Selenium") or (MH "Zinc")                                                                                                                                                                                                                                                                                                                                                                                                                                                                                                                                                                                                                                                                                                                                                                                               | Expanders - Apply equivalent subjects<br>Search modes - Boolean/Phrase | Interface - EBSCOhost<br>Research Databases<br>Search Screen - Advanced Search<br>Database - CINAHL with Full Text |
| S14 | S12 OR S13                                                                                                                                                                                                                                                                                                                                                                                                                                                                                                                                                                                                                                                                                                                                                                                                                                                                                                                                                                                                                                                                                                                                                                                                                                                                                                                                                       | Expanders - Apply equivalent subjects<br>Search modes - Boolean/Phrase | Interface - EBSCOhost<br>Research Databases<br>Search Screen - Advanced Search<br>Database - CINAHL with Full Text |
| S13 | TI ((laboratory N2 (marker or markers or values or test* or technique* or service or services or diagnos* or examin* or evaluat*)) or ("lab test" or "lab tests" or "lab result" or "lab results" or "lab value" or "lab values" or deficien*)) or AB ((laboratory N2 (marker or                                                                                                                                                                                                                                                                                                                                                                                                                                                                                                                                                                                                                                                                                                                                                                                                                                                                                                                                                                                                                                                                                 | Expanders - Apply equivalent subjects<br>Search modes - Boolean/Phrase | Interface - EBSCOhost<br>Research Databases<br>Search Screen - Advanced Search<br>Database - CINAHL with Full Text |

|     |                                                                                                                                                                                                                                                                                                                                                                                                                                                                                                                                                                                                                                                                                                                                                    |                                                                        |                                                                                                                    |
|-----|----------------------------------------------------------------------------------------------------------------------------------------------------------------------------------------------------------------------------------------------------------------------------------------------------------------------------------------------------------------------------------------------------------------------------------------------------------------------------------------------------------------------------------------------------------------------------------------------------------------------------------------------------------------------------------------------------------------------------------------------------|------------------------------------------------------------------------|--------------------------------------------------------------------------------------------------------------------|
|     | markers or values or test* or technique* or service or services or diagnos* or examin* or evaluat*) or ("lab test" or "lab tests" or "lab result" or "lab results" or "lab value" or "lab values" or deficien*))                                                                                                                                                                                                                                                                                                                                                                                                                                                                                                                                   |                                                                        |                                                                                                                    |
| S12 | (MH "Clinical Laboratories+")                                                                                                                                                                                                                                                                                                                                                                                                                                                                                                                                                                                                                                                                                                                      | Expanders - Apply equivalent subjects<br>Search modes - Boolean/Phrase | Interface - EBSCOhost<br>Research Databases<br>Search Screen - Advanced Search<br>Database - CINAHL with Full Text |
| S11 | S3 OR S9 OR S10                                                                                                                                                                                                                                                                                                                                                                                                                                                                                                                                                                                                                                                                                                                                    | Expanders - Apply equivalent subjects<br>Search modes - Boolean/Phrase | Interface - EBSCOhost<br>Research Databases<br>Search Screen - Advanced Search<br>Database - CINAHL with Full Text |
| S10 | TI ((chemo* or antineoplas* or anti-neoplas* or anticancer* or anti-cancer* or anticarcino* or anti-carcino* or antitumor or anti-tumor or antitumour or anti-tumour or carcinochemo* or carcinostatic or "tumor inhibitor" or "tumour inhibitor") N3 (neuropath* or neuralgia or neurotox* or mononeuropath* or mono-neuropath* or polyneuropath* or poly-neuropath*)) or AB ((chemo* or antineoplas* or anti-neoplas* or anticancer* or anti-cancer* or anticarcino* or anti-carcino* or antitumor or anti-tumor or antitumour or anti-tumour or carcinochemo* or carcinostatic or "tumor inhibitor" or "tumour inhibitor") N3 (neuropath* or neuralgia or neurotox* or mononeuropath* or mono-neuropath* or polyneuropath* or poly-neuropath*)) | Expanders - Apply equivalent subjects<br>Search modes - Boolean/Phrase | Interface - EBSCOhost<br>Research Databases<br>Search Screen - Advanced Search<br>Database - CINAHL with Full Text |
| S9  | S7 AND S8                                                                                                                                                                                                                                                                                                                                                                                                                                                                                                                                                                                                                                                                                                                                          | Expanders - Apply equivalent subjects<br>Search modes - Boolean/Phrase | Interface - EBSCOhost<br>Research Databases<br>Search Screen - Advanced Search<br>Database - CINAHL with Full Text |
| S8  | (MH "Antineoplastic Agents+") or (MH "Chemotherapy, Adjuvant+") or TI ((anticancer* or anti-cancer* or anticarcino* or anti-carcino* or antitumor or anti-tumor or antitumour* or anti-tumour* or carcinostatic) N2 (therap* or agent or agents or treatment* or management*)) or carcinochemo* or "tumor inhibitor" or "tumour inhibitor") or AB ((anticancer* or anti-cancer* or anticarcino* or anti-carcino* or antitumor or anti-tumor or antitumour* or anti-tumour* or carcinostatic) N2 (therap* or agent or agents or treatment* or management*)) or carcinochemo* or "tumor inhibitor" or "tumour inhibitor")                                                                                                                            | Expanders - Apply equivalent subjects<br>Search modes - Boolean/Phrase | Interface - EBSCOhost<br>Research Databases<br>Search Screen - Advanced Search<br>Database - CINAHL with Full Text |
| S7  | S4 OR S5 OR S6                                                                                                                                                                                                                                                                                                                                                                                                                                                                                                                                                                                                                                                                                                                                     | Expanders - Apply equivalent subjects                                  | Interface - EBSCOhost<br>Research Databases                                                                        |

|    |                                                                                                                                                                                                  |                                                                        |                                                                                                                 |
|----|--------------------------------------------------------------------------------------------------------------------------------------------------------------------------------------------------|------------------------------------------------------------------------|-----------------------------------------------------------------------------------------------------------------|
|    |                                                                                                                                                                                                  | Search modes - Boolean/Phrase                                          | Search Screen - Advanced Search<br>Database - CINAHL with Full Text                                             |
| S6 | TI (PNS N2 (disease* or disorder*)) or AB (PNS N2 (disease* or disorder*))                                                                                                                       | Expanders - Apply equivalent subjects<br>Search modes - Boolean/Phrase | Interface - EBSCOhost Research Databases<br>Search Screen - Advanced Search<br>Database - CINAHL with Full Text |
| S5 | TI ((peripheral N2 (nerve* or nervous) N2 (disease* or disorder*)) or "peripheral neuropath*") or AB ((peripheral N2 (nerve* or nervous) N2 (disease* or disorder*)) or "peripheral neuropath*") | Expanders - Apply equivalent subjects<br>Search modes - Boolean/Phrase | Interface - EBSCOhost Research Databases<br>Search Screen - Advanced Search<br>Database - CINAHL with Full Text |
| S4 | (MH "Peripheral Nervous System Diseases+")                                                                                                                                                       | Expanders - Apply equivalent subjects<br>Search modes - Boolean/Phrase | Interface - EBSCOhost Research Databases<br>Search Screen - Advanced Search<br>Database - CINAHL with Full Text |
| S3 | S1 OR S2                                                                                                                                                                                         | Expanders - Apply equivalent subjects<br>Search modes - Boolean/Phrase | Interface - EBSCOhost Research Databases<br>Search Screen - Advanced Search<br>Database - CINAHL with Full Text |
| S2 | (MH "Neuralgia+/CI")                                                                                                                                                                             | Expanders - Apply equivalent subjects<br>Search modes - Boolean/Phrase | Interface - EBSCOhost Research Databases<br>Search Screen - Advanced Search<br>Database - CINAHL with Full Text |
| S1 | (MH "Peripheral Nervous System Diseases+/CI")                                                                                                                                                    | Expanders - Apply equivalent subjects<br>Search modes - Boolean/Phrase | Interface - EBSCOhost Research Databases<br>Search Screen - Advanced Search<br>Database - CINAHL with Full Text |

## 9. Epistemonikos

Cochrane Database of Systematic Reviews (CDSR) Last searched: Jun 3, 2020

Pubmed Last searched: Jun 3, 2020

EMBASE Last searched: May 29, 2020

CINAHL (The Cumulative Index to Nursing and Allied Health Literature) Last searched: May 29, 2020

PsycINFO Last searched: May 29, 2020

LILACS (Literatura Latinoamericana y del Caribe en Ciencias de la Salud) Last searched: May 29, 2020

Database of Abstracts of Reviews of Effects (DARE) Last searched: Aug 24, 2017 - No new records have been added to DARE after 2015

The Campbell Collaboration online library Last searched: May 30, 2020

JBIC Database of Systematic Reviews and Implementation Reports Last searched: Jun 1, 2020

EPPI-Centre Evidence Library Last searched: Mar 9, 2020

#### Databases regularly updated:

Cochrane Database of Systematic Reviews (CDSR) Last searched: Dec 8, 2021

Pubmed Last searched: Dec 8, 2021

EMBASE Last searched: Dec 7, 2021

CINAHL (The Cumulative Index to Nursing and Allied Health Literature) Last searched: Dec 7, 2021

PsycINFO Last searched: Dec 7, 2021

LILACS (Literatura Latinoamericana y del Caribe en Ciencias de la Salud) Last searched: Dec 7, 2021

Database of Abstracts of Reviews of Effects (DARE) Last searched: Aug 24, 2017 - No new records have been added to DARE after 2015

The Campbell Collaboration online library Last searched: Nov 23, 2020

JBIC Database of Systematic Reviews and Implementation Reports Last searched: May 1, 2021

EPPI-Centre Evidence Library Last searched: Mar 9, 2020

#### Other search sources

All of the systematic reviews being summarized in structured summaries, broad syntheses, and methodological studies (which is an exclusion criteria from Epistemonikos) are also included in the database.

#### Search #1

(title:(Peripheral Neuropathy) OR abstract:(Peripheral Neuropathy)) AND (title:(hemoglobin OR hemoglobins OR haemoglobin OR hemoglobine OR haemoglobine OR haemoglobins OR hemoglobulin OR hematocrit OR ferrohaemoglobin OR ferrohemoglobin OR erythrocytes OR eryhem OR albumin OR albumen OR prealbumin OR pre-albumin OR total-protein OR leptin OR globulin OR globulins OR polyglobulin OR poly-globulin OR choline OR bursine OR fagine OR vidine OR thiamin OR thiamine OR anemi\* OR anaemi\* OR aneurin OR riboflavin OR riboflavine OR "flavin mononucleotide" OR "flavin-adenine dinucleotide" OR niacin OR niacinamide OR enduramide OR nicobion OR nicotinamide OR nicotinsaureamid OR papulex OR "pantothenic acid" OR "calcium pantothenate" OR dexol OR "zinc pantothenate" OR "pyridoxal phosphate" OR "pyridoxal 5-phosphate" OR "pyridoxal-P" OR biotin OR folate OR "folic acid" OR folacin OR folvite OR folvit OR "pteroylglutamic acid" OR cobalamin OR cobalamins OR cyanocobalamin OR eritron OR "B1" OR "B2" OR "B3" OR "B5" OR "B6" OR "B7" OR "B9" OR "B12" OR "methylmalonic acid" OR "methyl malonate" OR "methyl malonic acid" OR methylmalonate OR retinol OR carotene OR "Aquasol A" OR phytomenadione OR menaquinone OR menadione OR calcium OR chloride OR magnesium OR phosphorus OR romag OR potassium OR kalium OR sodium OR chromium OR copper OR fluoride OR iodine OR iron OR "Fe" OR "Fe+++" OR ferro OR ferrum OR manganese OR molybdenum OR selenium OR zinc) OR abstract:(hemoglobin OR hemoglobins OR haemoglobin OR hemoglobine OR haemoglobine OR haemoglobins OR hemoglobulin OR hematocrit OR ferrohaemoglobin OR ferrohemoglobin OR erythrocytes OR eryhem OR albumin OR albumen OR prealbumin OR pre-albumin OR total-protein OR leptin OR globulin OR globulins OR polyglobulin OR poly-globulin OR choline OR bursine OR fagine OR vidine OR thiamin OR thiamine OR anemi\* OR anaemi\* OR aneurin OR riboflavin OR riboflavine OR "flavin mononucleotide" OR "flavin-adenine dinucleotide" OR niacin OR niacinamide OR enduramide OR nicobion OR nicotinamide OR nicotinsaureamid OR papulex OR "pantothenic acid" OR "calcium pantothenate" OR dexol OR "zinc pantothenate" OR "pyridoxal phosphate" OR "pyridoxal 5-phosphate" OR "pyridoxal-P" OR biotin OR



folate OR "folic acid" OR folacin OR folvite OR folvit OR "pteroylglutamic acid" OR cobalamin OR cobalamins OR cyanocobalamin OR eritron OR "B1" OR "B2" OR "B3" OR "B5" OR "B6" OR "B7" OR "B9" OR "B12" OR "methylmalonic acid" OR "methyl malonate" OR "methyl malonic acid" OR methylmalonate OR retinol OR carotene OR "Aquasol A" OR phytomenadione OR menaquinone OR menadione OR calcium OR chloride OR magnesium OR phosphorus OR romag OR potassium OR kalium OR sodium OR chromium OR copper OR fluoride OR iodine OR iron OR "Fe" OR "Fe+++" OR ferro OR ferrum OR manganese OR molybdenum OR selenium OR zinc)) AND (title:(Chemotherapy-Induced OR "Chemotherapy Induced" OR "chemically induced") OR abstract:(Chemotherapy-Induced OR "Chemotherapy Induced" OR "chemically induced"))

Results: 6

Results: 8

## Search #2

(title:(((title:(nutrition\* OR nutrient\* OR vitamin\* OR mineral\* OR anemi\*) OR abstract:(nutrition\* OR nutrient\* OR vitamin\* OR mineral\* OR anemi\*)) AND (title:(Chemotherapy-Induced Peripheral Neuropathy) OR abstract:(Chemotherapy-Induced Peripheral Neuropathy))) OR abstract:(((title:(nutrition\* OR nutrient\* OR vitamin\* OR mineral\* OR anemi\*) OR abstract:(nutrition\* OR nutrient\* OR vitamin\* OR mineral\* OR anemi\*)) AND (title:(Chemotherapy-Induced Peripheral Neuropathy) OR abstract:(Chemotherapy-Induced Peripheral Neuropathy))))

Results: 16

Unique results: 11

Total unique results from Epistemonikos: 17

Results: 21

Unique results: 16

Total unique results from Epistemonikos in updated search: 24

**Grey Literature** – all resources searched June 05, 2020. All updated searches were completed on December 08, 2021.

10. ClinicalTrials.gov <http://www.clinicaltrials.gov/>

| Searched<br>June 05,<br>2020 | Search terms                                                                                         | # total results | # relevant/ non-duplicate<br>results |
|------------------------------|------------------------------------------------------------------------------------------------------|-----------------|--------------------------------------|
|                              | Condition or disease: Chemotherapy-induced Peripheral Neuropathy<br>Other terms: laboratory or tests | 65              | 1                                    |
|                              | Condition or disease: Chemotherapy-induced Peripheral Neuropathy<br>Other terms: nutrition           | 2               | 0                                    |
|                              | Condition or disease: Chemotherapy-induced Peripheral Neuropathy<br>Other terms: nutrient            | 8               | 8                                    |

|       |                                                                                                |   |    |
|-------|------------------------------------------------------------------------------------------------|---|----|
|       | Condition or disease: Chemotherapy-induced Peripheral Neuropathy<br>Other terms: vitamin       | 9 | 1  |
|       | Condition or disease: Chemotherapy-induced Peripheral Neuropathy<br>Other terms: mineral       | 0 | 0  |
|       | Condition or disease: Chemotherapy-induced Peripheral Neuropathy<br>Other terms: micronutrient | 8 | 0  |
| Total |                                                                                                |   | 10 |

|                                  |                                                                                                      |                        |                                              |
|----------------------------------|------------------------------------------------------------------------------------------------------|------------------------|----------------------------------------------|
| Searched<br>December<br>08, 2021 | <b>Search terms</b>                                                                                  | <b># total results</b> | <b># relevant/ non-duplicate<br/>results</b> |
|                                  | Condition or disease: Chemotherapy-induced Peripheral Neuropathy<br>Other terms: laboratory or tests | 5                      | 5                                            |
|                                  | Condition or disease: Chemotherapy-induced Peripheral Neuropathy<br>Other terms: nutrition           | 3                      | 1                                            |
|                                  | Condition or disease: Chemotherapy-induced Peripheral Neuropathy<br>Other terms: nutrient            | 1                      | 0                                            |
|                                  | Condition or disease: Chemotherapy-induced Peripheral Neuropathy<br>Other terms: vitamin             | 9                      | 0                                            |
|                                  | Condition or disease: Chemotherapy-induced Peripheral Neuropathy<br>Other terms: mineral             | 0                      | 0                                            |
|                                  | Condition or disease: Chemotherapy-induced Peripheral Neuropathy<br>Other terms: micronutrient       | 8                      | 0                                            |
| Total                            |                                                                                                      |                        | 6                                            |

**11.** medRxiv <https://www.medrxiv.org/>

|                              |                                            |                        |                                              |
|------------------------------|--------------------------------------------|------------------------|----------------------------------------------|
| Searched<br>June 05,<br>2020 | <b>Search terms</b>                        | <b># total results</b> | <b># relevant/ non-duplicate<br/>results</b> |
|                              | Chemotherapy-induced Peripheral Neuropathy | 3                      | 0                                            |
|                              | Peripheral Neuropathy and nutrition        | 17                     | 0                                            |
|                              | Peripheral Neuropathy and vitamin          | 14                     | 0                                            |

|       |                                    |   |   |
|-------|------------------------------------|---|---|
|       | Peripheral Neuropathy and mineral  | 5 | 0 |
|       | Peripheral Neuropathy and nutrient | 7 | 0 |
| Total |                                    |   | 0 |

|                                  |                                            |                        |                                              |
|----------------------------------|--------------------------------------------|------------------------|----------------------------------------------|
| Searched<br>December<br>08, 2021 | <b>Search terms</b>                        | <b># total results</b> | <b># relevant/ non-duplicate<br/>results</b> |
|                                  | Chemotherapy-induced Peripheral Neuropathy | 15                     | 2                                            |
|                                  | Peripheral Neuropathy and nutrition        | 77                     | 0                                            |
|                                  | Peripheral Neuropathy and vitamin          | 46                     | 0                                            |
|                                  | Peripheral Neuropathy and mineral          | 19                     | 0                                            |
|                                  | Peripheral Neuropathy and nutrient         | 25                     | 0                                            |
| Total                            |                                            |                        | 2                                            |

## 12. NICE Evidence <https://www.evidence.nhs.uk/>

|                              |                                                      |                        |                                              |
|------------------------------|------------------------------------------------------|------------------------|----------------------------------------------|
| Searched<br>June 05,<br>2020 | <b>Search terms</b>                                  | <b># total results</b> | <b># relevant/ non-duplicate<br/>results</b> |
|                              | Chemotherapy-induced Peripheral Neuropathy nutrition | 93                     | 0                                            |
|                              | Chemotherapy-induced Peripheral Neuropathy nutrient  | 15                     | 0                                            |
|                              | Chemotherapy-induced Peripheral Neuropathy vitamin   | 69                     | 3                                            |
|                              | Chemotherapy-induced Peripheral Neuropathy mineral   | 31                     | 0                                            |
| Total                        |                                                      |                        | 3                                            |

|                                  |                                                                                                                                            |                        |                                              |
|----------------------------------|--------------------------------------------------------------------------------------------------------------------------------------------|------------------------|----------------------------------------------|
| Searched<br>December<br>08, 2021 | <b>Search terms</b>                                                                                                                        | <b># total results</b> | <b># relevant/ non-duplicate<br/>results</b> |
|                                  | Chemotherapy-induced Peripheral Neuropathy nutrition<br><i>Date filter</i><br>From: 01/01/2020 [MM/DD/YYYY]<br>To: 12/08/2021 [MM/DD/YYYY] | 6                      | 0                                            |
|                                  | Chemotherapy-induced Peripheral Neuropathy nutrient<br><i>Date filter</i>                                                                  | 1                      | 0                                            |

|       |                                                                                                                                          |   |   |
|-------|------------------------------------------------------------------------------------------------------------------------------------------|---|---|
|       | From: 01/01/2020 [MM/DD/YYYY]<br>To: 12/08/2021 [MM/DD/YYYY]                                                                             |   |   |
|       | Chemotherapy-induced Peripheral Neuropathy vitamin<br><i>Date filter</i><br>From: 01/01/2020 [MM/DD/YYYY]<br>To: 12/08/2021 [MM/DD/YYYY] | 5 | 1 |
|       | Chemotherapy-induced Peripheral Neuropathy mineral<br><i>Date filter</i><br>From: 01/01/2020 [MM/DD/YYYY]<br>To: 12/08/2021 [MM/DD/YYYY] | 4 | 0 |
| Total |                                                                                                                                          |   | 1 |

### 13. OpenGrey <http://www.opengrey.eu/>

|                              |                                            |                        |                                          |
|------------------------------|--------------------------------------------|------------------------|------------------------------------------|
| Searched<br>June 05,<br>2020 | <b>Search terms</b>                        | <b># total results</b> | <b># relevant/ non-duplicate results</b> |
|                              | Chemotherapy-induced Peripheral Neuropathy | 1                      | 0                                        |
|                              | Peripheral Neuropathy nutrition            | 0                      | 0                                        |
|                              | Peripheral Neuropathy nutrient             | 0                      | 0                                        |
|                              | Peripheral Neuropathy vitamin              | 1                      | 0                                        |
|                              | Peripheral Neuropathy mineral              | 1                      | 0                                        |
| Total                        |                                            |                        | 0                                        |

OpenGrey is now archived at DANS EASY Archive <https://doi.org/10.17026/dans-xtf-47w5>.

|                                  |                                            |                        |                                          |
|----------------------------------|--------------------------------------------|------------------------|------------------------------------------|
| Searched<br>December<br>08, 2021 | <b>Search terms</b>                        | <b># total results</b> | <b># relevant/ non-duplicate results</b> |
|                                  | Chemotherapy-induced Peripheral Neuropathy | 2                      | 0                                        |
|                                  | Peripheral Neuropathy nutrition            | 0                      | 0                                        |
|                                  | Peripheral Neuropathy nutrient             | 0                      | 0                                        |
|                                  | Peripheral Neuropathy vitamin              | 0                      | 0                                        |
|                                  | Peripheral Neuropathy mineral              | 0                      | 0                                        |
| Total                            |                                            |                        | 0                                        |

### 14. PROSPERO <https://www.crd.york.ac.uk/prospERO/>

| Searched<br>June 05,<br>2020 | Search terms                               | # total results | # relevant/ non-duplicate<br>results |
|------------------------------|--------------------------------------------|-----------------|--------------------------------------|
|                              | Chemotherapy-induced Peripheral Neuropathy | 26              | 0                                    |
|                              | Peripheral Neuropathy laboratory           | 0               | 0                                    |
|                              | Peripheral Neuropathy "lab tests"          | 0               | 0                                    |
|                              | Peripheral Neuropathy "lab values"         | 0               | 0                                    |
| Total                        |                                            |                 | 0                                    |

| Searched<br>December<br>08, 2021 | Search terms                                                                                                    | # total results | # relevant/ non-duplicate<br>results |
|----------------------------------|-----------------------------------------------------------------------------------------------------------------|-----------------|--------------------------------------|
|                                  | Chemotherapy-induced Peripheral Neuropathy<br><i>Only considered records registered after January 01, 2020.</i> | 55              | 1                                    |
|                                  | Peripheral Neuropathy laboratory<br><i>Only considered records registered after January 01, 2020.</i>           | 0               | 0                                    |
|                                  | Peripheral Neuropathy "lab tests"<br><i>Only considered records registered after January 01, 2020.</i>          | 0               | 0                                    |
|                                  | Peripheral Neuropathy "lab values"<br><i>Only considered records registered after January 01, 2020.</i>         | 0               | 0                                    |
| Total                            |                                                                                                                 |                 | 1                                    |
